# Supplementary material for: Signature construction and molecular subtype identification based on immune-related genes for better prediction of prognosis in hepatocellular carcinoma
Source: BMC Med Genomics. 2023 Jun 14;16:130. doi: 10.1186/s12920-023-01558-z (PMC10265900; doi:10.1186/s12920-023-01558-z)
Supplement: Supplementary file 1 — Additional file 1: Table S1. Difference analysis between normal and tumor groups of LIHC. [file 12920_2023_1558_MOESM1_ESM.xlsx]

## Sheet: Sheet1
Table S1 Difference analysis between normal and tumor groups of LIHC
gene	gene_id	gene_type	logFC	pValue	fdr
CLEC4M	ENSG00000104938	protein_coding	-5.58995	6.96784e-27	2.86046e-25
CLEC4G	ENSG00000182566	protein_coding	-5.39826	4.29441e-45	6.93585e-43
CLEC1B	ENSG00000165682	protein_coding	-5.21646	2.04195e-30	1.17673e-28
BMP10	ENSG00000163217	protein_coding	-4.9803	4.95091e-14	5.44053e-13
FCN2	ENSG00000160339	protein_coding	-4.88939	5.97238e-40	6.98181e-38
STAB2	ENSG00000136011	protein_coding	-4.86006	5.48002e-62	2.01796e-59
MARCO	ENSG00000019169	protein_coding	-4.85442	4.01944e-41	5.1934e-39
GDF2	ENSG00000263761	protein_coding	-4.76886	2.64313e-13	2.66805e-12
BMPER	ENSG00000164619	protein_coding	-4.51527	2.35368e-50	4.98114e-48
CRHBP	ENSG00000145708	protein_coding	-4.47693	5.26682e-44	7.85204e-42
KRT16P1	ENSG00000214856	transcribed_unprocessed_pseudogene	-4.40373	1.55347e-07	7.40232e-07
NDST3	ENSG00000164100	protein_coding	-4.36003	8.92289e-36	7.73121e-34
RFPL4AP6	ENSG00000278292	unprocessed_pseudogene	-4.33896	1.03728e-22	2.8569e-21
PZP	ENSG00000126838	protein_coding	-4.33721	5.77103e-33	4.09465e-31
AC107396.1	ENSG00000251049	lncRNA	-4.3291	1.60492e-10	1.14279e-09
RD3L	ENSG00000227729	protein_coding	-4.26873	6.07163e-10	4.02342e-09
INS-IGF2	ENSG00000129965	protein_coding	-4.1599	9.13005e-12	7.65319e-11
FCN3	ENSG00000142748	protein_coding	-4.09693	3.08379e-41	4.01263e-39
RFPL1	ENSG00000128250	protein_coding	-4.02931	1.02759e-22	2.83658e-21
COLEC10	ENSG00000184374	protein_coding	-3.95336	1.96106e-38	2.08711e-36
AC093725.2	ENSG00000250333	lncRNA	-3.92031	6.10976e-12	5.23101e-11
AC006960.2	ENSG00000237400	lncRNA	-3.91381	3.10939e-08	1.63222e-07
CYP26A1	ENSG00000095596	protein_coding	-3.86041	5.02546e-27	2.09816e-25
TEX26	ENSG00000175664	protein_coding	-3.81354	4.16579e-16	5.79747e-15
CHRM2	ENSG00000181072	protein_coding	-3.79046	1.89343e-15	2.45161e-14
AC010776.2	ENSG00000267774	lncRNA	-3.7368	3.35041e-16	4.718e-15
CYP2C19	ENSG00000165841	protein_coding	-3.73139	4.53568e-28	2.07223e-26
PVALB	ENSG00000100362	protein_coding	-3.67126	3.29021e-30	1.86398e-28
PRPF38AP1	ENSG00000225053	processed_pseudogene	-3.62142	1.28647e-11	1.05767e-10
HAMP	ENSG00000105697	protein_coding	-3.60596	6.21504e-18	1.05467e-16
FGF23	ENSG00000118972	protein_coding	-3.59693	5.31506e-08	2.70558e-07
CXCL14	ENSG00000145824	protein_coding	-3.56676	9.60416e-20	1.97577e-18
CCBE1	ENSG00000183287	protein_coding	-3.52209	5.23001e-29	2.6898e-27
NTF3	ENSG00000185652	protein_coding	-3.50734	7.60598e-44	1.12783e-41
VIPR1	ENSG00000114812	protein_coding	-3.48472	2.63841e-45	4.29898e-43
TIMD4	ENSG00000145850	protein_coding	-3.47208	3.06292e-27	1.30543e-25
MT1P3	ENSG00000229230	processed_pseudogene	-3.46811	5.57266e-12	4.78897e-11
KCNN2	ENSG00000080709	protein_coding	-3.46344	6.01217e-30	3.3093e-28
FAM183DP	ENSG00000205716	processed_pseudogene	-3.45925	1.84242e-24	5.88423e-23
ASS1P2	ENSG00000223922	processed_pseudogene	-3.44819	4.65944e-21	1.10482e-19
CFP	ENSG00000126759	protein_coding	-3.40588	2.00206e-56	5.71502e-54
LINC01093	ENSG00000249173	lncRNA	-3.39648	2.81075e-21	6.76933e-20
GPR182	ENSG00000166856	protein_coding	-3.3931	5.09389e-32	3.38588e-30
IL1RL1	ENSG00000115602	protein_coding	-3.37379	8.45293e-27	3.44707e-25
COL6A6	ENSG00000206384	protein_coding	-3.37007	1.40717e-36	1.29544e-34
SMUG1P1	ENSG00000267444	processed_pseudogene	-3.34398	1.07239e-11	8.87611e-11
HHIP	ENSG00000164161	protein_coding	-3.3265	9.64875e-16	1.28874e-14
AC096577.1	ENSG00000248373	lncRNA	-3.32118	4.77554e-05	0.000154829
AP004782.1	ENSG00000279711	TEC	-3.31657	2.56185e-25	8.94195e-24
CNDP1	ENSG00000150656	protein_coding	-3.28551	6.44052e-18	1.08842e-16
CYP1A2	ENSG00000140505	protein_coding	-3.27353	5.23059e-12	4.51503e-11
OIT3	ENSG00000138315	protein_coding	-3.27282	2.29852e-70	1.45932e-67
KRT16P2	ENSG00000227300	transcribed_unprocessed_pseudogene	-3.25681	2.31671e-06	9.28095e-06
PTH1R	ENSG00000160801	protein_coding	-3.25274	2.14433e-46	3.65569e-44
MT2P1	ENSG00000162840	processed_pseudogene	-3.25227	4.07583e-25	1.38511e-23
KRT16P3	ENSG00000214822	transcribed_unprocessed_pseudogene	-3.2505	2.06204e-05	7.09122e-05
LINC01920	ENSG00000236049	lncRNA	-3.24753	8.8128e-10	5.73665e-09
SYT10	ENSG00000110975	protein_coding	-3.23936	2.52939e-08	1.34677e-07
FOSB	ENSG00000125740	protein_coding	-3.23532	2.3916e-27	1.03488e-25
DBH	ENSG00000123454	protein_coding	-3.218	4.96309e-41	6.3021e-39
IGFALS	ENSG00000099769	protein_coding	-3.19551	3.73767e-23	1.07193e-21
COX6B1P4	ENSG00000253813	processed_pseudogene	-3.17481	1.8541e-31	1.18123e-29
DEFA3	ENSG00000239839	protein_coding	-3.15658	4.10279e-13	4.04393e-12
GPM6A	ENSG00000150625	protein_coding	-3.15235	1.82019e-26	7.19171e-25
LINC01612	ENSG00000250266	lncRNA	-3.14308	6.07742e-07	2.64439e-06
ADRA1A	ENSG00000120907	protein_coding	-3.13854	1.36016e-24	4.38969e-23
BCO2	ENSG00000197580	protein_coding	-3.12983	6.32115e-31	3.84109e-29
MT1XP1	ENSG00000233929	processed_pseudogene	-3.12417	1.09382e-23	3.26673e-22
DHRS7C	ENSG00000184544	protein_coding	-3.12366	2.55723e-06	1.01737e-05
FOS	ENSG00000170345	protein_coding	-3.10402	1.15256e-37	1.15331e-35
PCDH9-AS2	ENSG00000228842	lncRNA	-3.07702	3.27778e-06	1.28351e-05
ECM1	ENSG00000143369	protein_coding	-3.07524	2.89303e-57	8.80437e-55
AC015468.1	ENSG00000253147	lncRNA	-3.04069	1.08276e-10	7.88907e-10
CD5L	ENSG00000073754	protein_coding	-3.03446	2.21991e-18	3.96826e-17
AL121892.1	ENSG00000236985	lncRNA	-3.0296	3.72828e-16	5.22414e-15
AC026461.2	ENSG00000259923	lncRNA	-3.02834	2.03715e-12	1.84768e-11
LYVE1	ENSG00000133800	protein_coding	-2.9886	7.09641e-33	4.97749e-31
ANGPTL6	ENSG00000130812	protein_coding	-2.987	7.58132e-57	2.21567e-54
AMHR2	ENSG00000135409	protein_coding	-2.98592	1.16719e-14	1.38603e-13
S100A12	ENSG00000163221	protein_coding	-2.98541	4.78877e-30	2.65575e-28
AC015468.3	ENSG00000254260	lncRNA	-2.98487	2.18865e-09	1.34776e-08
NUDT10	ENSG00000122824	protein_coding	-2.97711	2.52143e-16	3.59045e-15
KCTD9P4	ENSG00000214264	processed_pseudogene	-2.97499	8.06065e-20	1.67509e-18
CCL23	ENSG00000274736	protein_coding	-2.96751	2.86785e-61	1.03535e-58
NAT2	ENSG00000156006	protein_coding	-2.95811	1.41663e-20	3.17504e-19
NXF3	ENSG00000147206	protein_coding	-2.95334	4.26465e-22	1.10983e-20
MT1H	ENSG00000205358	protein_coding	-2.93883	4.96965e-10	3.33581e-09
MAG	ENSG00000105695	protein_coding	-2.93768	2.03708e-14	2.34711e-13
PHACTR3	ENSG00000087495	protein_coding	-2.92886	4.91962e-30	2.72421e-28
MT1F	ENSG00000198417	protein_coding	-2.92843	1.38873e-15	1.82442e-14
PROK2	ENSG00000163421	protein_coding	-2.92306	4.05193e-22	1.05897e-20
RSPO3	ENSG00000146374	protein_coding	-2.92152	1.19574e-15	1.5816e-14
LRAT	ENSG00000121207	protein_coding	-2.92035	8.41756e-45	1.31342e-42
DNASE1L3	ENSG00000163687	protein_coding	-2.91208	4.70387e-35	3.93671e-33
LINC00907	ENSG00000267586	lncRNA	-2.90548	2.19399e-20	4.84652e-19
CSF3	ENSG00000108342	protein_coding	-2.90481	2.0336e-13	2.09001e-12
PCSK2	ENSG00000125851	protein_coding	-2.90449	1.69951e-08	9.24005e-08
AC016999.1	ENSG00000229915	lncRNA	-2.88056	7.72028e-28	3.45433e-26
AP000439.2	ENSG00000255980	lncRNA	-2.87661	1.14845e-21	2.88673e-20
APOF	ENSG00000175336	protein_coding	-2.87436	1.1831e-23	3.52479e-22
AC092155.1	ENSG00000226622	lncRNA	-2.8706	1.50869e-12	1.39029e-11
DIRAS3	ENSG00000162595	protein_coding	-2.85135	1.21533e-23	3.60913e-22
HMGCLL1	ENSG00000146151	protein_coding	-2.84722	1.51494e-22	4.09891e-21
SLITRK6	ENSG00000184564	protein_coding	-2.84097	1.64412e-10	1.16991e-09
ADAMTS13	ENSG00000160323	protein_coding	-2.83358	1.56688e-83	2.83892e-80
LIFR	ENSG00000113594	protein_coding	-2.83329	1.4198e-41	1.88747e-39
CWH43	ENSG00000109182	protein_coding	-2.82483	3.54145e-10	2.42128e-09
C14orf180	ENSG00000184601	protein_coding	-2.82125	1.50331e-08	8.2341e-08
AADAT	ENSG00000109576	protein_coding	-2.8101	8.93087e-40	1.02772e-37
CETP	ENSG00000087237	protein_coding	-2.80696	2.40184e-40	2.89037e-38
C21orf62	ENSG00000205929	protein_coding	-2.80682	3.52767e-28	1.63812e-26
FENDRR	ENSG00000268388	lncRNA	-2.78989	5.64563e-21	1.3267e-19
FPR2	ENSG00000171049	protein_coding	-2.78949	4.06551e-23	1.16324e-21
TBX20	ENSG00000164532	protein_coding	-2.78869	6.53895e-15	7.97319e-14
ASS1P11	ENSG00000225308	processed_pseudogene	-2.78723	6.2538e-17	9.53581e-16
TTC36	ENSG00000172425	protein_coding	-2.78376	9.46023e-16	1.26402e-14
LRRC55	ENSG00000183908	protein_coding	-2.77554	3.26262e-25	1.12178e-23
MT1HL1	ENSG00000244020	protein_coding	-2.74245	2.2288e-06	8.95606e-06
CYP2C8	ENSG00000138115	protein_coding	-2.6952	1.56146e-22	4.22169e-21
SLITRK3	ENSG00000121871	protein_coding	-2.6931	5.24322e-07	2.30732e-06
SPSB4	ENSG00000175093	protein_coding	-2.68648	4.52755e-16	6.26541e-15
CXCL12	ENSG00000107562	protein_coding	-2.68523	7.46684e-33	5.22736e-31
ADGRG7	ENSG00000144820	protein_coding	-2.68511	1.62658e-25	5.79278e-24
CALN1	ENSG00000183166	protein_coding	-2.67642	5.77315e-09	3.34788e-08
AC023158.1	ENSG00000259937	lncRNA	-2.67529	1.49845e-07	7.15956e-07
MIR4686	ENSG00000265258	miRNA	-2.66684	0.00109594	0.00277615
SLC25A47	ENSG00000140107	protein_coding	-2.66612	2.11087e-14	2.42454e-13
ITLN1	ENSG00000179914	protein_coding	-2.66395	1.51314e-12	1.39404e-11
CCDC26	ENSG00000229140	lncRNA	-2.66022	1.57643e-22	4.25901e-21
COL25A1	ENSG00000188517	protein_coding	-2.64929	1.18939e-18	2.1987e-17
AMD1P4	ENSG00000215124	processed_pseudogene	-2.6484	1.0374e-13	1.09585e-12
AC091729.2	ENSG00000226291	lncRNA	-2.6405	7.63469e-08	3.80845e-07
AC026369.3	ENSG00000256948	lncRNA	-2.64022	1.06147e-18	1.96914e-17
CYP2B6	ENSG00000197408	protein_coding	-2.63557	8.15695e-20	1.69319e-18
LINC02319	ENSG00000258694	lncRNA	-2.63338	2.8969e-05	9.72783e-05
DACH1	ENSG00000276644	protein_coding	-2.6295	3.51165e-34	2.72812e-32
AC090227.3	ENSG00000267674	lncRNA	-2.61637	4.7879e-10	3.21909e-09
C9	ENSG00000113600	protein_coding	-2.61422	4.60652e-12	4.00829e-11
AC087477.4	ENSG00000259534	lncRNA	-2.61104	3.81811e-06	1.47842e-05
EGR1	ENSG00000120738	protein_coding	-2.60372	6.46294e-34	4.8669e-32
UBTFL10	ENSG00000255385	processed_pseudogene	-2.60324	8.42372e-09	4.78253e-08
LRRN3	ENSG00000173114	protein_coding	-2.60275	2.99255e-24	9.32298e-23
LINC01818	ENSG00000230645	lncRNA	-2.59971	9.648e-13	9.12373e-12
BHLHA9	ENSG00000205899	protein_coding	-2.59501	2.01781e-05	6.95272e-05
AC010280.2	ENSG00000248884	lncRNA	-2.59394	1.45217e-16	2.12624e-15
MT1E	ENSG00000169715	protein_coding	-2.59317	6.3786e-14	6.90029e-13
AC093001.1	ENSG00000244468	lncRNA	-2.57974	0.000195774	0.000571567
LCAT	ENSG00000213398	protein_coding	-2.57648	1.4332e-31	9.19443e-30
PPBP	ENSG00000163736	protein_coding	-2.57361	2.52828e-13	2.55984e-12
MT1X	ENSG00000187193	protein_coding	-2.55364	2.20317e-15	2.83967e-14
LINC02153	ENSG00000253199	lncRNA	-2.55357	4.56084e-06	1.74582e-05
EGR2	ENSG00000122877	protein_coding	-2.55119	5.88538e-30	3.24436e-28
AC245123.1	ENSG00000277526	lncRNA	-2.54232	2.64311e-11	2.08415e-10
PITPNM3	ENSG00000091622	protein_coding	-2.52731	1.91649e-19	3.84594e-18
LGI1	ENSG00000108231	protein_coding	-2.52646	1.09331e-09	7.02373e-09
AC007906.2	ENSG00000277639	protein_coding	-2.52187	1.06882e-26	4.30146e-25
AL603840.1	ENSG00000234810	lncRNA	-2.50791	5.14276e-20	1.08588e-18
RND3	ENSG00000115963	protein_coding	-2.50725	4.85324e-51	1.09642e-48
MT1G	ENSG00000125144	protein_coding	-2.50127	1.23262e-08	6.82558e-08
BMP5	ENSG00000112175	protein_coding	-2.49465	1.02696e-11	8.52114e-11
ESR1	ENSG00000091831	protein_coding	-2.49447	7.81981e-19	1.47443e-17
AVPR1A	ENSG00000166148	protein_coding	-2.48625	1.64623e-11	1.33109e-10
GHR	ENSG00000112964	protein_coding	-2.48262	5.35703e-31	3.27143e-29
FAM180A	ENSG00000189320	protein_coding	-2.48211	3.33086e-13	3.31323e-12
ZPBP	ENSG00000042813	protein_coding	-2.47996	4.4985e-06	1.72409e-05
MT1CP	ENSG00000205360	transcribed_unprocessed_pseudogene	-2.47833	4.16617e-10	2.82169e-09
AC087392.1	ENSG00000262003	lncRNA	-2.47475	2.13486e-11	1.70418e-10
PHLDA1	ENSG00000139289	protein_coding	-2.47321	6.17714e-38	6.30103e-36
CLTRN	ENSG00000147003	protein_coding	-2.46971	3.24223e-20	7.01068e-19
INMT	ENSG00000241644	protein_coding	-2.46656	1.49945e-22	4.05998e-21
MT2A	ENSG00000125148	protein_coding	-2.46148	6.96284e-18	1.16864e-16
AF165147.1	ENSG00000232855	lncRNA	-2.46135	3.52665e-24	1.08856e-22
CYP39A1	ENSG00000146233	protein_coding	-2.46074	5.83285e-17	8.93836e-16
ST8SIA6	ENSG00000148488	protein_coding	-2.45089	5.69488e-18	9.70422e-17
RIPOR3	ENSG00000042062	protein_coding	-2.44682	1.66946e-25	5.93973e-24
PTGS2	ENSG00000073756	protein_coding	-2.44302	3.53203e-21	8.43473e-20
SLC17A8	ENSG00000179520	protein_coding	-2.43471	5.97559e-11	4.49622e-10
P2RY12	ENSG00000169313	protein_coding	-2.42911	3.62827e-22	9.49592e-21
KDM8	ENSG00000155666	protein_coding	-2.42802	2.5026e-28	1.18011e-26
LINC01507	ENSG00000230945	lncRNA	-2.42408	0.000327128	0.000916406
SFRP1	ENSG00000104332	protein_coding	-2.42104	4.67724e-15	5.8011e-14
MRPS36P4	ENSG00000255231	processed_pseudogene	-2.41609	3.28717e-09	1.97466e-08
KIF19	ENSG00000196169	protein_coding	-2.41459	6.92505e-28	3.11746e-26
RCAN1	ENSG00000159200	protein_coding	-2.41111	4.23157e-53	1.08967e-50
LINC02005	ENSG00000242741	lncRNA	-2.41015	0.000135871	0.000408066
AL161782.1	ENSG00000280366	lncRNA	-2.40907	0.00204081	0.00489422
AC099508.2	ENSG00000261058	lncRNA	-2.40681	3.61991e-13	3.58621e-12
AC004540.2	ENSG00000225792	lncRNA	-2.40301	3.33393e-12	2.94621e-11
SLC22A1	ENSG00000175003	protein_coding	-2.39485	1.30071e-12	1.2129e-11
ADH4	ENSG00000198099	protein_coding	-2.39312	4.87986e-14	5.37047e-13
NPY1R	ENSG00000164128	protein_coding	-2.38525	1.37446e-20	3.08994e-19
AC009063.3	ENSG00000261103	lncRNA	-2.38446	3.2438e-08	1.69745e-07
LINC01863	ENSG00000253959	lncRNA	-2.37782	4.26153e-10	2.88256e-09
HAO2	ENSG00000116882	protein_coding	-2.37145	1.06179e-12	1.00075e-11
KBTBD11	ENSG00000176595	protein_coding	-2.36105	1.53839e-18	2.7989e-17
TSLP	ENSG00000145777	protein_coding	-2.35779	3.67988e-17	5.73943e-16
SIGLEC11	ENSG00000161640	protein_coding	-2.35323	7.15772e-29	3.59095e-27
AC004160.1	ENSG00000230333	lncRNA	-2.35173	6.56578e-13	6.3359e-12
AC104809.1	ENSG00000223991	lncRNA	-2.35005	1.60337e-06	6.57634e-06
MRO	ENSG00000134042	protein_coding	-2.34806	1.42062e-30	8.25126e-29
HTR2A-AS1	ENSG00000224517	lncRNA	-2.34702	1.69989e-16	2.46444e-15
SYT9	ENSG00000170743	protein_coding	-2.34531	6.58429e-06	2.45703e-05
LPA	ENSG00000198670	protein_coding	-2.34465	2.75993e-20	5.99951e-19
HAND2-AS1	ENSG00000237125	lncRNA	-2.34067	6.80587e-11	5.08872e-10
AL355612.1	ENSG00000271945	lncRNA	-2.33934	0.000677314	0.0017851
B3GALT5-AS1	ENSG00000184809	lncRNA	-2.33398	7.19876e-06	2.66768e-05
FP671120.6	ENSG00000280800	lncRNA	-2.33379	0.00029221	0.000825179
SOCS3	ENSG00000184557	protein_coding	-2.3293	1.35982e-25	4.91346e-24
AC138356.1	ENSG00000183154	lncRNA	-2.32466	1.29693e-23	3.83908e-22
FAM163B	ENSG00000196990	protein_coding	-2.32277	1.36197e-09	8.63222e-09
DCN	ENSG00000011465	protein_coding	-2.32137	6.02113e-15	7.38089e-14
SLC22A10	ENSG00000184999	protein_coding	-2.32126	1.62245e-17	2.62963e-16
NATP	ENSG00000253937	unprocessed_pseudogene	-2.31974	0.000201394	0.000585745
UROC1	ENSG00000159650	protein_coding	-2.31104	1.4917e-11	1.21582e-10
AC004053.1	ENSG00000248242	lncRNA	-2.30978	0.000324902	0.000911003
AC092384.2	ENSG00000259881	lncRNA	-2.30768	3.74831e-10	2.55323e-09
BEND3P2	ENSG00000224809	processed_pseudogene	-2.30159	1.35474e-09	8.59085e-09
GRIN2B	ENSG00000273079	protein_coding	-2.30021	9.77527e-12	8.14584e-11
SAA2	ENSG00000134339	protein_coding	-2.29972	9.35151e-08	4.59821e-07
LINC02512	ENSG00000251061	lncRNA	-2.29848	0.00238021	0.00563911
PLAC8	ENSG00000145287	protein_coding	-2.2896	2.07361e-17	3.31561e-16
SCGB2A2	ENSG00000110484	protein_coding	-2.28833	0.0024156	0.00571267
GLP2R	ENSG00000065325	protein_coding	-2.28773	2.17857e-11	1.73606e-10
GBA3	ENSG00000249948	polymorphic_pseudogene	-2.28498	1.21459e-15	1.60424e-14
PDZRN4	ENSG00000165966	protein_coding	-2.28419	1.60219e-10	1.14118e-09
CPEB3	ENSG00000107864	protein_coding	-2.28161	2.17789e-42	3.01499e-40
FREM2	ENSG00000150893	protein_coding	-2.28098	1.43541e-06	5.9231e-06
RETREG1	ENSG00000154153	protein_coding	-2.2801	7.09147e-15	8.6269e-14
MFSD2A	ENSG00000168389	protein_coding	-2.27959	2.20434e-11	1.75509e-10
SAA2-SAA4	ENSG00000255071	protein_coding	-2.27917	4.29953e-08	2.21064e-07
CXCR2	ENSG00000180871	protein_coding	-2.27177	1.26975e-18	2.33669e-17
RANBP3L	ENSG00000164188	protein_coding	-2.27129	3.76556e-14	4.19429e-13
TCIM	ENSG00000176907	protein_coding	-2.26763	9.58013e-33	6.64367e-31
MT1M	ENSG00000205364	protein_coding	-2.26687	1.64789e-07	7.81272e-07
CXCR1	ENSG00000163464	protein_coding	-2.26388	1.16128e-17	1.91076e-16
CSRNP1	ENSG00000144655	protein_coding	-2.25741	3.75994e-60	1.29398e-57
PLGLA	ENSG00000240935	transcribed_unprocessed_pseudogene	-2.25582	6.94217e-14	7.48576e-13
AC003988.1	ENSG00000234223	lncRNA	-2.255	4.02165e-07	1.80514e-06
GNAO1	ENSG00000087258	protein_coding	-2.25435	6.05684e-15	7.41727e-14
NCOA7-AS1	ENSG00000232131	lncRNA	-2.25392	1.01783e-09	6.57205e-09
CYP4A11	ENSG00000187048	protein_coding	-2.25319	6.60962e-21	1.54437e-19
PADI4	ENSG00000159339	protein_coding	-2.25215	1.51106e-16	2.20544e-15
ANKRD55	ENSG00000164512	protein_coding	-2.24881	2.40804e-22	6.40243e-21
MOGAT2	ENSG00000166391	protein_coding	-2.24634	7.61971e-13	7.30128e-12
ADRA2B	ENSG00000274286	protein_coding	-2.24404	3.25689e-40	3.89389e-38
RET	ENSG00000165731	protein_coding	-2.24111	9.37783e-11	6.89005e-10
KRTAP1-1	ENSG00000188581	protein_coding	-2.23966	5.40791e-05	0.00017374
NNMT	ENSG00000166741	protein_coding	-2.2388	2.59077e-13	2.61808e-12
NRXN1	ENSG00000179915	protein_coding	-2.23808	1.61273e-06	6.6096e-06
GCNT1P3	ENSG00000231047	processed_pseudogene	-2.23792	1.38409e-11	1.13514e-10
AC005077.2	ENSG00000224273	transcribed_unprocessed_pseudogene	-2.23289	7.42461e-09	4.24408e-08
AC008080.1	ENSG00000173862	lncRNA	-2.23235	9.774e-21	2.24248e-19
HSD17B13	ENSG00000170509	protein_coding	-2.22902	7.99744e-09	4.55738e-08
AMPD1	ENSG00000116748	protein_coding	-2.22278	2.25179e-08	1.20313e-07
ATP13A4	ENSG00000127249	protein_coding	-2.22219	2.59364e-12	2.3221e-11
SERPINE1	ENSG00000106366	protein_coding	-2.22196	1.09286e-20	2.49187e-19
PCK1	ENSG00000124253	protein_coding	-2.21946	2.17652e-14	2.4945e-13
NR4A3	ENSG00000119508	protein_coding	-2.21786	1.38286e-20	3.10313e-19
CTNNA3	ENSG00000183230	protein_coding	-2.21471	2.02622e-11	1.62274e-10
AC105384.1	ENSG00000249706	lncRNA	-2.2145	7.18057e-16	9.74271e-15
LRRC19	ENSG00000184434	protein_coding	-2.21361	4.07211e-11	3.13443e-10
SLC5A7	ENSG00000115665	protein_coding	-2.21146	0.000196029	0.000572087
TMEM26	ENSG00000196932	protein_coding	-2.20534	2.6148e-35	2.22373e-33
SCGB3A1	ENSG00000161055	protein_coding	-2.19715	2.42641e-20	5.31213e-19
AC010280.1	ENSG00000248359	lncRNA	-2.19586	1.30156e-09	8.27213e-09
SPATA22	ENSG00000141255	protein_coding	-2.19532	3.0282e-07	1.38145e-06
SOCS2	ENSG00000120833	protein_coding	-2.19394	2.36525e-26	9.23628e-25
GYS2	ENSG00000111713	protein_coding	-2.18991	2.50228e-14	2.84307e-13
CYP4A22	ENSG00000162365	protein_coding	-2.1878	2.91346e-18	5.12591e-17
MS4A3	ENSG00000149516	protein_coding	-2.18207	0.000155177	0.000461644
GXYLT1P4	ENSG00000275026	transcribed_processed_pseudogene	-2.18118	5.82769e-06	2.19157e-05
ZFP36	ENSG00000128016	protein_coding	-2.17185	2.76235e-47	5.08605e-45
AC079061.1	ENSG00000248050	lncRNA	-2.16894	5.18226e-11	3.929e-10
PAMR1	ENSG00000149090	protein_coding	-2.16792	2.55694e-29	1.35089e-27
LHX2	ENSG00000106689	protein_coding	-2.16657	2.25253e-21	5.49682e-20
AL358613.2	ENSG00000279607	lncRNA	-2.16559	6.57334e-09	3.78332e-08
EHD3	ENSG00000013016	protein_coding	-2.16428	2.19694e-41	2.879e-39
LILRA5	ENSG00000187116	protein_coding	-2.16049	1.60022e-28	7.67249e-27
NR4A1	ENSG00000123358	protein_coding	-2.15882	6.33876e-23	1.78318e-21
IL1RN	ENSG00000136689	protein_coding	-2.15835	6.85669e-27	2.82428e-25
EFNB3	ENSG00000108947	protein_coding	-2.15204	9.82301e-22	2.47586e-20
LINC00683	ENSG00000266256	lncRNA	-2.151	8.97203e-08	4.42758e-07
TPPP2	ENSG00000179636	protein_coding	-2.14648	6.51048e-18	1.09923e-16
BX842568.4	ENSG00000235510	unprocessed_pseudogene	-2.14032	5.61196e-12	4.81937e-11
ST6GAL2	ENSG00000144057	protein_coding	-2.13882	3.20116e-11	2.5001e-10
HAO2-IT1	ENSG00000230921	lncRNA	-2.13725	4.93683e-09	2.88791e-08
AL021328.1	ENSG00000269985	lncRNA	-2.13447	9.39063e-07	3.97335e-06
EGR3	ENSG00000179388	protein_coding	-2.13285	4.42402e-22	1.14968e-20
ASS1P4	ENSG00000213487	processed_pseudogene	-2.13227	2.05937e-10	1.44971e-09
ST6GAL2-IT1	ENSG00000238250	lncRNA	-2.13125	2.38912e-05	8.12766e-05
KBTBD11-OT1	ENSG00000253696	lncRNA	-2.12397	1.01492e-09	6.55446e-09
IGKV6D-21	ENSG00000225523	IG_V_gene	-2.1216	5.47372e-06	2.06732e-05
AL357033.2	ENSG00000223669	lncRNA	-2.11525	3.47195e-06	1.35407e-05
DPPA2P4	ENSG00000261429	processed_pseudogene	-2.11372	1.14354e-05	4.10186e-05
ERVFRD-1	ENSG00000244476	protein_coding	-2.11323	1.72393e-11	1.39062e-10
AC005357.2	ENSG00000267623	transcribed_unprocessed_pseudogene	-2.11174	0.00345133	0.00790076
TCTEX1D1	ENSG00000152760	protein_coding	-2.1113	4.21826e-13	4.15329e-12
PGLYRP1	ENSG00000008438	protein_coding	-2.10628	1.06729e-20	2.43657e-19
EPHA2	ENSG00000142627	protein_coding	-2.10413	5.20068e-36	4.58158e-34
DSCAM	ENSG00000171587	protein_coding	-2.09792	1.30138e-11	1.06897e-10
AL358216.1	ENSG00000225140	lncRNA	-2.09498	8.28234e-09	4.71025e-08
HBB	ENSG00000244734	protein_coding	-2.08712	6.66795e-16	9.07393e-15
HHIP-AS1	ENSG00000248890	lncRNA	-2.08655	2.52879e-11	1.99828e-10
AOC1	ENSG00000002726	protein_coding	-2.08484	1.39206e-08	7.65093e-08
AC010970.1	ENSG00000225840	processed_pseudogene	-2.08434	2.08221e-05	7.15588e-05
IL1RAPL2	ENSG00000189108	protein_coding	-2.07902	4.523e-11	3.45263e-10
MYOM2	ENSG00000036448	protein_coding	-2.07879	2.83386e-17	4.46544e-16
FOLH1B	ENSG00000134612	transcribed_unprocessed_pseudogene	-2.07852	4.68457e-09	2.75127e-08
PLPP4	ENSG00000203805	protein_coding	-2.07824	1.10665e-08	6.16977e-08
FITM1	ENSG00000139914	protein_coding	-2.07659	1.74296e-20	3.86875e-19
LINC02027	ENSG00000243694	lncRNA	-2.07502	2.3522e-06	9.40673e-06
LINC02275	ENSG00000248319	lncRNA	-2.07261	1.26021e-07	6.08841e-07
GLYATL1	ENSG00000166840	protein_coding	-2.07177	5.82319e-18	9.90454e-17
CR1	ENSG00000203710	protein_coding	-2.07126	1.00067e-15	1.33413e-14
ASPG	ENSG00000166183	protein_coding	-2.07075	1.24642e-09	7.9381e-09
HGF	ENSG00000019991	protein_coding	-2.06991	5.72549e-14	6.2322e-13
AC023490.4	ENSG00000278044	lncRNA	-2.06522	0.0044743	0.00999645
ADGRE1	ENSG00000174837	protein_coding	-2.06233	7.06895e-17	1.07432e-15
FCAR	ENSG00000186431	protein_coding	-2.0618	1.13298e-13	1.19339e-12
EPHB1	ENSG00000154928	protein_coding	-2.06038	3.41865e-22	8.97921e-21
MTUS2	ENSG00000132938	protein_coding	-2.05924	9.76181e-08	4.78909e-07
ACSM3	ENSG00000005187	protein_coding	-2.0574	8.39592e-23	2.34221e-21
AGBL4	ENSG00000186094	protein_coding	-2.05724	1.66514e-08	9.06251e-08
AC010547.2	ENSG00000260015	lncRNA	-2.05627	0.000427381	0.00116906
C7	ENSG00000112936	protein_coding	-2.05556	4.25157e-10	2.87635e-09
MIR514B	ENSG00000252583	miRNA	-2.05466	2.39208e-05	8.13578e-05
SLCO1B3	ENSG00000111700	protein_coding	-2.05216	1.45519e-06	5.99729e-06
IL1RAP	ENSG00000196083	protein_coding	-2.05215	1.56683e-34	1.24615e-32
SIGLEC7	ENSG00000168995	protein_coding	-2.05111	1.57524e-29	8.46813e-28
NOL4	ENSG00000101746	protein_coding	-2.04891	2.4899e-06	9.91865e-06
AC080100.1	ENSG00000279675	TEC	-2.0489	3.50809e-11	2.72536e-10
SAA1	ENSG00000173432	protein_coding	-2.04799	5.61267e-07	2.45756e-06
AC004160.2	ENSG00000230435	lncRNA	-2.03986	3.84917e-07	1.73109e-06
CDH19	ENSG00000071991	protein_coding	-2.03971	3.58348e-08	1.86434e-07
GTSCR1	ENSG00000263417	lncRNA	-2.03896	7.28935e-08	3.64705e-07
GSTZ1	ENSG00000100577	protein_coding	-2.03819	5.37978e-29	2.75912e-27
FBP1	ENSG00000165140	protein_coding	-2.03804	2.7443e-19	5.41275e-18
RDH16	ENSG00000139547	protein_coding	-2.03624	1.42996e-13	1.49296e-12
AC104024.1	ENSG00000230709	lncRNA	-2.03425	4.96609e-14	5.45233e-13
CPED1	ENSG00000106034	protein_coding	-2.03213	3.16391e-21	7.57036e-20
HP	ENSG00000257017	protein_coding	-2.0317	8.52957e-15	1.02846e-13
NGFR	ENSG00000064300	protein_coding	-2.03023	5.39578e-16	7.40291e-15
ADGRG4	ENSG00000156920	protein_coding	-2.02237	0.000494909	0.00133631
SLC27A6	ENSG00000113396	protein_coding	-2.02046	0.000242865	0.00069554
CCDC196	ENSG00000196553	protein_coding	-2.01969	1.49075e-07	7.12741e-07
SRPX	ENSG00000101955	protein_coding	-2.01855	2.75478e-13	2.77088e-12
AC008556.1	ENSG00000277013	lncRNA	-2.01791	2.0783e-30	1.19474e-28
AC245128.3	ENSG00000268734	lncRNA	-2.01791	2.20628e-11	1.75625e-10
MT1JP	ENSG00000255986	transcribed_unprocessed_pseudogene	-2.01316	0.000227059	0.000654498
TFPI2	ENSG00000105825	protein_coding	-2.01315	2.64196e-14	2.99254e-13
SRD5A2	ENSG00000277893	protein_coding	-2.01277	7.88477e-11	5.83498e-10
LY6E	ENSG00000160932	protein_coding	-2.01122	7.7864e-15	9.4349e-14
TMEM26-AS1	ENSG00000237233	lncRNA	-2.00865	5.8228e-20	1.22315e-18
DPT	ENSG00000143196	protein_coding	-2.00797	8.90245e-09	5.03183e-08
TRIB1	ENSG00000173334	protein_coding	-2.00755	5.43927e-45	8.67081e-43
AC087477.1	ENSG00000242295	processed_pseudogene	-2.00751	1.69588e-06	6.93033e-06
TH	ENSG00000180176	protein_coding	-2.00735	2.67044e-06	1.05886e-05
CCN1	ENSG00000142871	protein_coding	-2.00417	2.4035e-27	1.03881e-25
IGHA1	ENSG00000211895	IG_C_gene	-2.00394	1.8502e-09	1.15107e-08
AL157832.2	ENSG00000237224	lncRNA	-2.00341	1.86508e-11	1.49989e-10
RCVRN	ENSG00000109047	protein_coding	-2.00237	6.42901e-15	7.84433e-14
AL392089.1	ENSG00000226403	lncRNA	-2.00191	1.75395e-12	1.60108e-11
MUCL1	ENSG00000172551	protein_coding	2.00096	0.000563246	0.00150603
H2AC12	ENSG00000274997	protein_coding	2.00135	3.27576e-07	1.48977e-06
LINC01556	ENSG00000204709	lncRNA	2.00147	2.72362e-06	1.07867e-05
AC126407.1	ENSG00000260978	lncRNA	2.00178	9.60762e-05	0.000296382
PHYHIPL	ENSG00000165443	protein_coding	2.00204	1.15207e-14	1.36984e-13
LINC02809	ENSG00000276255	lncRNA	2.00226	2.55207e-07	1.17825e-06
TGM4	ENSG00000163810	protein_coding	2.00252	5.65254e-08	2.87023e-07
ASCL5	ENSG00000232237	protein_coding	2.00258	4.29667e-07	1.91573e-06
HNRNPA1P27	ENSG00000233680	processed_pseudogene	2.00267	1.73152e-07	8.18295e-07
GRID2	ENSG00000152208	protein_coding	2.00348	0.00394868	0.00892774
FOLR1	ENSG00000110195	protein_coding	2.00485	1.47697e-07	7.07162e-07
CORIN	ENSG00000145244	protein_coding	2.00543	9.21571e-12	7.71622e-11
AL024498.1	ENSG00000272097	lncRNA	2.00563	1.25473e-16	1.8541e-15
CNFN	ENSG00000105427	protein_coding	2.00571	6.45699e-12	5.50271e-11
GPSM1	ENSG00000160360	protein_coding	2.00683	2.08859e-22	5.59753e-21
AC005696.4	ENSG00000277200	lncRNA	2.00739	3.10692e-05	0.00010381
PROK1	ENSG00000143125	protein_coding	2.00741	1.21894e-06	5.07784e-06
RPS6KL1	ENSG00000198208	protein_coding	2.00756	1.74146e-29	9.30731e-28
TFAP2A	ENSG00000137203	protein_coding	2.00757	1.75e-10	1.24118e-09
KIF1A	ENSG00000130294	protein_coding	2.00792	3.67168e-07	1.65734e-06
AL139220.2	ENSG00000230615	lncRNA	2.00813	6.75916e-14	7.29268e-13
AC112206.3	ENSG00000249721	processed_pseudogene	2.01057	1.28789e-06	5.34671e-06
AL138960.1	ENSG00000277831	lncRNA	2.01163	2.91839e-05	9.79466e-05
TPTE2P2	ENSG00000272281	transcribed_unprocessed_pseudogene	2.01259	0.000422496	0.00115681
DDX12P	ENSG00000214826	unprocessed_pseudogene	2.01273	7.1124e-39	7.77188e-37
FOXE3	ENSG00000186790	protein_coding	2.01355	6.01459e-07	2.62046e-06
CAPN8	ENSG00000203697	protein_coding	2.0136	7.28364e-14	7.82417e-13
AC018712.1	ENSG00000230104	processed_pseudogene	2.01385	9.08317e-05	0.000281477
KRT85	ENSG00000135443	protein_coding	2.01415	5.8162e-06	2.18779e-05
AP005264.3	ENSG00000267247	lncRNA	2.01442	0.00433058	0.00970599
CA8	ENSG00000178538	protein_coding	2.01555	8.38012e-12	7.06155e-11
H2AC7	ENSG00000196866	protein_coding	2.01626	1.96614e-14	2.27106e-13
AC092162.3	ENSG00000279205	TEC	2.01633	4.26817e-06	1.64265e-05
GJB6	ENSG00000121742	protein_coding	2.01678	2.39478e-05	8.14421e-05
GDF5	ENSG00000125965	protein_coding	2.01985	5.79281e-06	2.18002e-05
H4C14	ENSG00000270882	protein_coding	2.02017	6.68737e-19	1.2674e-17
LINC00189	ENSG00000215533	lncRNA	2.02121	7.1553e-09	4.09905e-08
SOAT2	ENSG00000167780	protein_coding	2.02183	8.75234e-09	4.95764e-08
AL139246.4	ENSG00000229393	lncRNA	2.02184	7.1211e-05	0.000224395
GNAL	ENSG00000141404	protein_coding	2.02192	3.60519e-22	9.44222e-21
AC007998.2	ENSG00000267140	protein_coding	2.02208	2.43697e-07	1.12695e-06
LINC02043	ENSG00000232233	lncRNA	2.02236	3.81955e-09	2.26784e-08
AC006277.1	ENSG00000279452	TEC	2.02291	1.32636e-28	6.42654e-27
CACNA1G	ENSG00000006283	protein_coding	2.02305	3.77541e-07	1.70041e-06
AC138466.1	ENSG00000256312	lncRNA	2.0231	0.000808258	0.00210015
MAMSTR	ENSG00000176909	protein_coding	2.02313	2.81744e-25	9.76006e-24
CAPN14	ENSG00000214711	protein_coding	2.02352	3.13805e-08	1.64586e-07
LINC01208	ENSG00000223715	lncRNA	2.02563	5.71278e-05	0.000182849
GLULP4	ENSG00000178723	processed_pseudogene	2.02723	1.31974e-07	6.35269e-07
AL139286.1	ENSG00000271914	lncRNA	2.02872	1.67546e-12	1.53247e-11
GLUL	ENSG00000135821	protein_coding	2.02904	1.15983e-12	1.08897e-11
RPS20P15	ENSG00000227523	processed_pseudogene	2.02923	3.51876e-05	0.000116503
TMCO1-AS1	ENSG00000224358	lncRNA	2.02924	4.07213e-25	1.38511e-23
AC006252.1	ENSG00000243224	lncRNA	2.0293	1.48904e-17	2.42514e-16
PSORS1C1	ENSG00000204540	protein_coding	2.03019	2.18672e-12	1.97411e-11
AL021392.1	ENSG00000234869	lncRNA	2.03035	3.04269e-13	3.04633e-12
H2BC18	ENSG00000203814	protein_coding	2.03042	5.82669e-18	9.9059e-17
AP002847.1	ENSG00000279138	TEC	2.03113	2.04704e-10	1.44158e-09
DPY19L2P2	ENSG00000170629	transcribed_unprocessed_pseudogene	2.03172	4.74466e-17	7.34106e-16
ADGRB2	ENSG00000121753	protein_coding	2.03172	2.3489e-13	2.3861e-12
TMEM72	ENSG00000187783	protein_coding	2.03222	1.17961e-07	5.7208e-07
AC126696.3	ENSG00000260498	lncRNA	2.03247	4.24682e-07	1.89627e-06
CELF2-AS1	ENSG00000181800	lncRNA	2.03309	0.000115688	0.000352072
OVOL1	ENSG00000172818	protein_coding	2.03336	2.31755e-06	9.28332e-06
UPK2	ENSG00000110375	protein_coding	2.03339	6.02874e-08	3.0499e-07
AC110285.6	ENSG00000279692	TEC	2.03456	1.68924e-23	4.95258e-22
AP003559.1	ENSG00000256443	lncRNA	2.03472	3.67092e-09	2.18593e-08
CD24	ENSG00000272398	protein_coding	2.03507	9.77403e-13	9.23579e-12
C1orf194	ENSG00000179902	protein_coding	2.03527	1.57493e-07	7.49681e-07
DLX3	ENSG00000064195	protein_coding	2.03537	0.000169433	0.000500738
MRPS17P1	ENSG00000268949	processed_pseudogene	2.03602	2.15792e-07	1.00472e-06
AC026523.1	ENSG00000259582	lncRNA	2.03655	0.00341353	0.00782495
AC100803.4	ENSG00000271959	lncRNA	2.0368	2.353e-15	3.02116e-14
CT66	ENSG00000234215	lncRNA	2.03708	6.7514e-07	2.91869e-06
AP006621.2	ENSG00000255142	lncRNA	2.03797	4.25449e-18	7.33461e-17
DISP3	ENSG00000204624	protein_coding	2.03837	2.15449e-08	1.15399e-07
SCN1A	ENSG00000144285	protein_coding	2.04017	0.000122626	0.000371621
AC068987.2	ENSG00000260473	lncRNA	2.04024	2.24827e-07	1.04454e-06
AP003064.2	ENSG00000255446	lncRNA	2.04178	4.70807e-06	1.79751e-05
IGSF1	ENSG00000147255	protein_coding	2.04197	4.6766e-11	3.56525e-10
LIN28A	ENSG00000131914	protein_coding	2.04231	0.000387185	0.00106815
AL355102.4	ENSG00000258793	lncRNA	2.04336	1.41136e-10	1.01251e-09
AC022092.1	ENSG00000249639	lncRNA	2.04353	3.31124e-05	0.000110098
MMP9	ENSG00000100985	protein_coding	2.04372	2.55044e-12	2.28621e-11
ALPK3	ENSG00000136383	protein_coding	2.04511	1.58704e-19	3.21813e-18
AC073114.1	ENSG00000226965	lncRNA	2.04589	1.10337e-05	3.96666e-05
DNAJC5G	ENSG00000163793	protein_coding	2.04607	6.83822e-07	2.95241e-06
NOTCH3	ENSG00000074181	protein_coding	2.04771	4.73696e-33	3.38706e-31
TMEM266	ENSG00000169758	protein_coding	2.04781	1.02248e-20	2.34007e-19
WDR38	ENSG00000136918	protein_coding	2.04828	6.03845e-07	2.62955e-06
RTL9	ENSG00000243978	protein_coding	2.04885	9.573e-10	6.20955e-09
NANOGP1	ENSG00000176654	transcribed_unprocessed_pseudogene	2.04946	5.994e-07	2.6118e-06
AXIN2	ENSG00000168646	protein_coding	2.04982	4.26894e-11	3.27363e-10
AC102953.2	ENSG00000273230	lncRNA	2.05028	7.92128e-36	6.87956e-34
DMKN	ENSG00000161249	protein_coding	2.05112	1.38811e-07	6.66523e-07
LINC02421	ENSG00000255970	lncRNA	2.05156	4.53308e-07	2.01431e-06
PADI1	ENSG00000142623	protein_coding	2.05174	5.43461e-05	0.000174552
AC004816.1	ENSG00000259153	lncRNA	2.05179	3.03783e-26	1.17014e-24
MIMT1	ENSG00000268654	lncRNA	2.05181	0.000104536	0.000320626
USP21P1	ENSG00000224826	processed_pseudogene	2.05197	0.000150462	0.000448924
AL021997.1	ENSG00000270326	processed_pseudogene	2.05356	6.09649e-07	2.65175e-06
AC233280.2	ENSG00000271662	processed_pseudogene	2.05387	9.6967e-11	7.11014e-10
CDC7	ENSG00000097046	protein_coding	2.05549	3.10051e-37	2.99667e-35
AC007224.2	ENSG00000279357	TEC	2.05641	8.23301e-12	6.94235e-11
AC022148.1	ENSG00000180458	lncRNA	2.05649	8.74603e-06	3.19762e-05
H2AC14	ENSG00000276368	protein_coding	2.05707	6.82167e-07	2.94595e-06
THEM7P	ENSG00000227160	transcribed_unitary_pseudogene	2.05728	1.56318e-05	5.49157e-05
MMP3	ENSG00000149968	protein_coding	2.05745	0.000131035	0.000394959
IMPDH1P6	ENSG00000254294	processed_pseudogene	2.05778	3.24158e-14	3.63927e-13
AL117344.1	ENSG00000218631	processed_pseudogene	2.05795	5.88559e-10	3.90366e-09
ZNF541	ENSG00000118156	protein_coding	2.05912	8.29513e-13	7.89914e-12
KRT17	ENSG00000128422	protein_coding	2.05997	2.16737e-10	1.52224e-09
AC126323.3	ENSG00000259878	lncRNA	2.06029	0.00123528	0.00309652
ACSBG2	ENSG00000130377	protein_coding	2.06094	1.59129e-09	9.99787e-09
PTGFR	ENSG00000122420	protein_coding	2.06177	5.20776e-09	3.03819e-08
PODXL2	ENSG00000114631	protein_coding	2.06187	4.17809e-09	2.46877e-08
AL139125.1	ENSG00000278982	TEC	2.06193	1.09273e-10	7.95076e-10
TMEM163	ENSG00000152128	protein_coding	2.06236	3.44984e-09	2.06564e-08
AL078612.2	ENSG00000255375	lncRNA	2.06433	0.000778511	0.00202973
LCNL1	ENSG00000214402	protein_coding	2.06433	8.27759e-07	3.53039e-06
AC080129.2	ENSG00000232874	lncRNA	2.06454	1.47482e-17	2.40518e-16
LINC01085	ENSG00000248698	transcribed_processed_pseudogene	2.06516	0.000196197	0.000572484
CAGE1	ENSG00000164304	protein_coding	2.06518	3.44878e-07	1.56267e-06
AC018648.1	ENSG00000272905	lncRNA	2.06683	1.83117e-11	1.47454e-10
DSCC1	ENSG00000136982	protein_coding	2.06739	9.11098e-51	2.0211e-48
AC026368.1	ENSG00000277840	lncRNA	2.06762	3.96829e-09	2.35235e-08
CKB	ENSG00000166165	protein_coding	2.06873	1.89145e-13	1.95264e-12
PROKR1	ENSG00000169618	protein_coding	2.06927	1.24594e-06	5.18247e-06
VSIG10L	ENSG00000186806	protein_coding	2.06939	1.63254e-17	2.64365e-16
ZNF556	ENSG00000172000	protein_coding	2.07012	1.32755e-08	7.31494e-08
SERPINI2	ENSG00000114204	protein_coding	2.07021	0.000146949	0.000439225
AC080080.1	ENSG00000279048	TEC	2.07033	3.88578e-24	1.1954e-22
ZNF300	ENSG00000145908	protein_coding	2.0706	1.32662e-20	2.98785e-19
AC211485.1	ENSG00000225005	processed_pseudogene	2.07126	4.338e-05	0.000141578
AC105219.3	ENSG00000254973	lncRNA	2.07136	9.80089e-07	4.1398e-06
ASB16	ENSG00000161664	protein_coding	2.07169	7.34289e-32	4.84578e-30
HCG20	ENSG00000228022	lncRNA	2.07216	1.06775e-10	7.78748e-10
AC048337.1	ENSG00000258435	lncRNA	2.0722	2.0619e-07	9.61959e-07
AC139100.2	ENSG00000278000	lncRNA	2.07257	4.65419e-25	1.57669e-23
CPA5	ENSG00000158525	protein_coding	2.07286	1.09435e-08	6.10489e-08
INPP5J	ENSG00000185133	protein_coding	2.07368	8.3195e-17	1.25659e-15
MUC2	ENSG00000198788	protein_coding	2.0742	0.000235168	0.000675442
LPGAT1-AS1	ENSG00000229258	lncRNA	2.07449	6.31063e-08	3.18245e-07
AC017002.1	ENSG00000225744	lncRNA	2.07498	1.33307e-06	5.51995e-06
LPL	ENSG00000175445	protein_coding	2.07498	5.71045e-27	2.37338e-25
CTXN1	ENSG00000178531	protein_coding	2.07542	2.58492e-13	2.61288e-12
FZD9	ENSG00000188763	protein_coding	2.07753	3.97016e-08	2.05189e-07
AL033381.1	ENSG00000176515	lncRNA	2.07768	0.000197761	0.0005765
DGCR5	ENSG00000273032	lncRNA	2.07801	2.39509e-13	2.42967e-12
RNU6-8	ENSG00000202337	snRNA	2.07898	1.0924e-17	1.80388e-16
PLPP2	ENSG00000141934	protein_coding	2.07952	1.74383e-09	1.08912e-08
AC109322.1	ENSG00000255224	lncRNA	2.07954	2.30906e-30	1.31624e-28
MIR589	ENSG00000207973	miRNA	2.08059	3.81133e-09	2.26369e-08
CD34	ENSG00000174059	protein_coding	2.08192	6.82109e-64	2.76022e-61
KLK15	ENSG00000174562	protein_coding	2.08198	0.00211873	0.00506526
TMEM52B	ENSG00000165685	protein_coding	2.0822	1.14687e-07	5.57229e-07
AC009121.4	ENSG00000263080	lncRNA	2.0832	2.45701e-11	1.94574e-10
FAM81A	ENSG00000157470	protein_coding	2.08325	9.59861e-19	1.78695e-17
MRPL23-AS1	ENSG00000226416	lncRNA	2.08414	5.81887e-06	2.18848e-05
TRPC6	ENSG00000137672	protein_coding	2.08509	6.36175e-35	5.17142e-33
AC139491.2	ENSG00000248596	lncRNA	2.08525	4.09548e-13	4.03888e-12
CELA3B	ENSG00000219073	protein_coding	2.08557	0.000190898	0.00055837
AC013400.1	ENSG00000271991	lncRNA	2.0869	9.01266e-10	5.86157e-09
AC084782.2	ENSG00000261823	lncRNA	2.08845	8.26869e-05	0.000258197
CIB3	ENSG00000141977	protein_coding	2.08848	2.42588e-06	9.68249e-06
AL109976.1	ENSG00000277287	lncRNA	2.09004	3.00618e-12	2.67649e-11
OR2I1P	ENSG00000237988	protein_coding	2.09037	8.90497e-16	1.19329e-14
FOXD2	ENSG00000186564	protein_coding	2.09089	1.62977e-28	7.79411e-27
CAPN11	ENSG00000137225	protein_coding	2.09168	5.76809e-35	4.75177e-33
CSMD3	ENSG00000164796	protein_coding	2.0918	0.000380079	0.00105052
AL122003.1	ENSG00000232175	processed_pseudogene	2.09192	0.000868581	0.00224438
HPSE2	ENSG00000172987	protein_coding	2.09223	1.67219e-07	7.92188e-07
LINC01267	ENSG00000251576	lncRNA	2.09267	9.63774e-05	0.000297261
SOCAR	ENSG00000240350	lncRNA	2.09291	2.49555e-11	1.97414e-10
RPSAP69	ENSG00000233487	transcribed_processed_pseudogene	2.09346	4.12234e-07	1.84606e-06
LINC02445	ENSG00000257750	lncRNA	2.09374	0.00208453	0.00498964
AC025154.2	ENSG00000257588	lncRNA	2.09389	0.000541472	0.00145297
AC138701.1	ENSG00000215567	unprocessed_pseudogene	2.09404	0.00175496	0.00426592
KCNQ3	ENSG00000184156	protein_coding	2.09423	1.30553e-16	1.92299e-15
SCAT2	ENSG00000257596	lncRNA	2.09426	7.69004e-21	1.78436e-19
AC007750.1	ENSG00000236841	lncRNA	2.09471	3.81275e-08	1.97581e-07
AC023908.3	ENSG00000261136	lncRNA	2.0951	1.05952e-20	2.42183e-19
CCNE2	ENSG00000175305	protein_coding	2.09582	1.08573e-28	5.32371e-27
GPC2	ENSG00000213420	protein_coding	2.09585	1.97422e-18	3.54141e-17
NKPD1	ENSG00000179846	protein_coding	2.09652	5.68991e-10	3.78546e-09
TSPAN5	ENSG00000168785	protein_coding	2.09694	5.9349e-14	6.44111e-13
AC126118.1	ENSG00000271993	lncRNA	2.09763	3.53569e-16	4.9713e-15
OR51B5	ENSG00000167355	protein_coding	2.09786	3.93255e-05	0.000129193
TEX45	ENSG00000198723	protein_coding	2.09822	4.86479e-13	4.76313e-12
AL845331.2	ENSG00000261522	transcribed_unprocessed_pseudogene	2.09852	5.33476e-06	2.01898e-05
AC008825.1	ENSG00000250453	lncRNA	2.09873	0.00304277	0.00705142
SLC6A9	ENSG00000196517	protein_coding	2.09946	5.58059e-21	1.31394e-19
AL357146.1	ENSG00000236013	lncRNA	2.0998	9.64165e-05	0.000297332
AC024587.1	ENSG00000248827	processed_pseudogene	2.1002	0.000189849	0.000555636
TPX2	ENSG00000088325	protein_coding	2.10044	1.15148e-33	8.58343e-32
AC073655.1	ENSG00000258172	lncRNA	2.10056	2.48447e-06	9.89919e-06
HBE1	ENSG00000213931	protein_coding	2.10145	0.000377683	0.00104452
AL356417.2	ENSG00000233682	lncRNA	2.10164	2.24327e-06	9.00832e-06
AC106820.5	ENSG00000260874	lncRNA	2.10167	4.20874e-14	4.65973e-13
CLCN1	ENSG00000188037	protein_coding	2.1019	1.75629e-10	1.24516e-09
GLULP3	ENSG00000254572	processed_pseudogene	2.10207	5.15958e-05	0.000166474
FOXD2-AS1	ENSG00000237424	lncRNA	2.10301	4.6479e-29	2.40385e-27
STMN1	ENSG00000117632	protein_coding	2.10331	5.02737e-47	8.94337e-45
FAM171A2	ENSG00000161682	protein_coding	2.10413	9.75153e-21	2.24011e-19
LINC00460	ENSG00000233532	lncRNA	2.10484	0.00315697	0.00729175
AC010201.2	ENSG00000271327	lncRNA	2.105	8.36531e-25	2.75778e-23
TRIM31-AS1	ENSG00000231226	lncRNA	2.1051	1.33666e-07	6.42743e-07
AL353572.1	ENSG00000225385	processed_pseudogene	2.10564	3.51197e-08	1.82947e-07
EFNA3	ENSG00000143590	protein_coding	2.10577	9.39679e-27	3.80668e-25
C4orf54	ENSG00000248713	protein_coding	2.10682	2.03541e-06	8.23016e-06
CSPG4	ENSG00000173546	protein_coding	2.10712	1.0879e-40	1.34433e-38
RASGEF1A	ENSG00000198915	protein_coding	2.10712	9.80061e-11	7.18347e-10
AL161752.1	ENSG00000259126	lncRNA	2.10769	8.56204e-05	0.000266696
AC078883.3	ENSG00000278924	TEC	2.10776	2.62073e-07	1.20723e-06
AC023355.1	ENSG00000259488	lncRNA	2.10803	6.39595e-19	1.21342e-17
AC026495.1	ENSG00000258654	lncRNA	2.10807	2.93953e-07	1.34316e-06
AP003174.1	ENSG00000255689	lncRNA	2.10807	9.57862e-12	7.99644e-11
TACC3	ENSG00000013810	protein_coding	2.1091	2.90393e-42	4.00503e-40
AC019183.1	ENSG00000266450	lncRNA	2.10952	1.27674e-05	4.54249e-05
COLEC12	ENSG00000158270	protein_coding	2.11004	4.41446e-14	4.88016e-13
AL355376.2	ENSG00000271220	transcribed_processed_pseudogene	2.11015	0.00393407	0.00889799
FLJ31104	ENSG00000227908	lncRNA	2.11025	1.1667e-20	2.65202e-19
MIR4664	ENSG00000265660	miRNA	2.11136	8.10699e-17	1.22651e-15
OR8A1	ENSG00000196119	protein_coding	2.11234	0.00369077	0.00839878
AC103770.1	ENSG00000254251	lncRNA	2.11269	0.00077623	0.0020245
LGR5	ENSG00000139292	protein_coding	2.1134	7.61672e-07	3.26479e-06
FAM182B	ENSG00000175170	lncRNA	2.1137	8.95708e-15	1.07754e-13
AP005328.1	ENSG00000272461	lncRNA	2.11372	0.000872849	0.00225462
AC004253.2	ENSG00000265046	lncRNA	2.11488	1.10645e-06	4.6363e-06
AC110285.2	ENSG00000262877	lncRNA	2.11541	1.12066e-23	3.34147e-22
AC021146.11	ENSG00000251529	unprocessed_pseudogene	2.11594	0.000562137	0.0015035
COX6CP2	ENSG00000231715	processed_pseudogene	2.11605	1.12191e-07	5.45603e-07
AL627309.1	ENSG00000238009	lncRNA	2.11694	1.27013e-05	4.52114e-05
AC091057.1	ENSG00000187951	lncRNA	2.117	6.75843e-34	5.07903e-32
HSF2BP	ENSG00000160207	protein_coding	2.11758	7.1967e-27	2.94457e-25
AL031665.1	ENSG00000274269	lncRNA	2.11777	8.07838e-07	3.44862e-06
AL645608.8	ENSG00000273443	lncRNA	2.11848	6.40415e-10	4.23767e-09
MAEL	ENSG00000143194	protein_coding	2.11889	3.34821e-10	2.29684e-09
H2BC20P	ENSG00000261716	transcribed_unprocessed_pseudogene	2.12065	2.06716e-45	3.39827e-43
AL162726.4	ENSG00000232749	lncRNA	2.12077	0.00183557	0.00444135
SLC9A3-AS1	ENSG00000225138	lncRNA	2.12099	2.09631e-18	3.75095e-17
SNX25P1	ENSG00000236809	unprocessed_pseudogene	2.12178	5.29042e-24	1.61672e-22
AC025580.1	ENSG00000259342	lncRNA	2.12193	6.46312e-06	2.41573e-05
DCAF4L1	ENSG00000182308	protein_coding	2.12209	1.23534e-18	2.27678e-17
CRIP3	ENSG00000146215	protein_coding	2.12258	1.47825e-27	6.47266e-26
AC007842.1	ENSG00000269069	processed_pseudogene	2.12263	5.56318e-26	2.08401e-24
AC068506.1	ENSG00000278464	lncRNA	2.12394	1.91407e-08	1.03288e-07
AC241584.1	ENSG00000230832	processed_pseudogene	2.12504	8.61911e-13	8.19494e-12
SCN4A	ENSG00000007314	protein_coding	2.12556	1.26503e-27	5.57218e-26
FRMPD2	ENSG00000170324	protein_coding	2.12598	2.3276e-05	7.93553e-05
LINC02367	ENSG00000260423	lncRNA	2.12601	5.56591e-17	8.54352e-16
AC097374.1	ENSG00000259848	transcribed_unprocessed_pseudogene	2.12602	0.00117022	0.00294668
AC006557.1	ENSG00000267150	lncRNA	2.12652	2.91995e-08	1.53914e-07
AL033384.1	ENSG00000236740	lncRNA	2.1276	2.21555e-08	1.18412e-07
H2AC11	ENSG00000196787	protein_coding	2.13034	3.34701e-13	3.32839e-12
SPHK1	ENSG00000176170	protein_coding	2.13047	1.99125e-12	1.80694e-11
LINC00173	ENSG00000196668	lncRNA	2.13072	5.82096e-12	4.99188e-11
PRELID3BP4	ENSG00000251163	processed_pseudogene	2.13075	3.29243e-06	1.2887e-05
PLK4	ENSG00000142731	protein_coding	2.13133	4.82146e-38	4.97326e-36
AC093821.1	ENSG00000249125	lncRNA	2.13142	0.00137776	0.00342247
FAM183A	ENSG00000186973	protein_coding	2.13147	2.29445e-06	9.20077e-06
AL133367.1	ENSG00000260285	lncRNA	2.13214	2.47973e-32	1.68787e-30
GUCY2D	ENSG00000132518	protein_coding	2.13235	4.49947e-12	3.91884e-11
AL592211.1	ENSG00000267834	lncRNA	2.13309	6.6765e-11	5.00011e-10
ZNF681	ENSG00000196172	protein_coding	2.13431	4.58675e-19	8.85697e-18
AC105137.2	ENSG00000276744	lncRNA	2.13466	5.56561e-21	1.31125e-19
KPNA7	ENSG00000185467	protein_coding	2.13544	2.92376e-18	5.14156e-17
LINC02805	ENSG00000232265	lncRNA	2.13608	1.05634e-06	4.43845e-06
LINC00896	ENSG00000236499	lncRNA	2.13622	5.66133e-15	6.96535e-14
AC099791.2	ENSG00000271200	lncRNA	2.13626	6.20702e-08	3.1332e-07
OCA2	ENSG00000104044	protein_coding	2.13669	1.53201e-07	7.30762e-07
ATP6V1FNB	ENSG00000272899	protein_coding	2.13684	4.69019e-24	1.43687e-22
LINC02257	ENSG00000238042	lncRNA	2.13704	0.000114611	0.0003492
AL121772.1	ENSG00000274414	lncRNA	2.13741	4.3505e-16	6.03855e-15
CDC25A	ENSG00000164045	protein_coding	2.13832	1.04381e-28	5.13865e-27
CALCA	ENSG00000110680	protein_coding	2.13851	1.20318e-07	5.83124e-07
AC010528.1	ENSG00000260983	lncRNA	2.14048	0.00142354	0.00352614
FXYD3	ENSG00000089356	protein_coding	2.14053	9.49539e-09	5.34237e-08
HOXA7	ENSG00000122592	protein_coding	2.14212	1.10729e-05	3.97918e-05
RNVU1-21	ENSG00000202408	snRNA	2.14307	1.16922e-07	5.67415e-07
FHAD1	ENSG00000142621	protein_coding	2.14436	5.78964e-18	9.85657e-17
FMO7P	ENSG00000230231	unprocessed_pseudogene	2.14482	1.62649e-05	5.6955e-05
AC007687.1	ENSG00000270178	lncRNA	2.14521	3.18123e-08	1.66755e-07
LINC00685	ENSG00000226179	lncRNA	2.14529	3.15376e-24	9.80033e-23
BTNL10	ENSG00000215811	transcribed_unitary_pseudogene	2.14593	2.15394e-10	1.51348e-09
UNC5A	ENSG00000113763	protein_coding	2.14606	9.92686e-15	1.18916e-13
RNU6-850P	ENSG00000252743	snRNA	2.14644	1.35288e-12	1.25868e-11
SLC26A3	ENSG00000091138	protein_coding	2.14704	2.67893e-09	1.62895e-08
KLHDC8A	ENSG00000162873	protein_coding	2.14833	7.20319e-10	4.73492e-09
STAC2	ENSG00000141750	protein_coding	2.14916	9.70378e-06	3.52086e-05
TMIGD1	ENSG00000182271	protein_coding	2.14928	0.000125181	0.000378961
LINC02384	ENSG00000251301	lncRNA	2.15021	3.54839e-09	2.11914e-08
ZNF252P-AS1	ENSG00000255559	lncRNA	2.1503	8.39347e-28	3.72836e-26
SPTA1	ENSG00000163554	protein_coding	2.15055	1.43628e-07	6.88664e-07
AL359851.1	ENSG00000260585	lncRNA	2.1517	2.72076e-07	1.24955e-06
SCGN	ENSG00000079689	protein_coding	2.15176	1.64927e-11	1.33303e-10
GDAP1L1	ENSG00000124194	protein_coding	2.15318	1.28958e-07	6.2181e-07
ACSL4	ENSG00000068366	protein_coding	2.15357	1.88334e-15	2.43941e-14
VN1R87P	ENSG00000268789	unprocessed_pseudogene	2.15471	0.000840695	0.00217706
PLCH2	ENSG00000149527	protein_coding	2.15506	1.44328e-11	1.17895e-10
AC068299.1	ENSG00000239093	snoRNA	2.15552	8.15374e-05	0.000254862
AC016737.1	ENSG00000271151	lncRNA	2.15565	1.19596e-18	2.20862e-17
AC138965.2	ENSG00000250820	lncRNA	2.15578	0.00140507	0.00348538
C12orf75	ENSG00000235162	protein_coding	2.15578	2.09853e-16	3.01389e-15
TEX22	ENSG00000226174	protein_coding	2.15595	3.80379e-24	1.17186e-22
SNAP91	ENSG00000065609	protein_coding	2.15639	0.000559894	0.00149793
TREML4	ENSG00000188056	protein_coding	2.15709	8.38011e-05	0.000261317
SRGAP3-AS2	ENSG00000228723	lncRNA	2.15717	0.00120627	0.00302875
PACSIN1	ENSG00000124507	protein_coding	2.15778	1.43779e-12	1.32961e-11
TMC7	ENSG00000170537	protein_coding	2.15894	2.98163e-32	2.01091e-30
CYP4F32P	ENSG00000223564	unprocessed_pseudogene	2.15939	0.00356437	0.00813628
AL513320.1	ENSG00000238260	lncRNA	2.15988	4.47197e-21	1.06105e-19
VEGFD	ENSG00000165197	protein_coding	2.16029	1.18787e-12	1.11388e-11
AL121970.1	ENSG00000236389	lncRNA	2.16044	0.00126118	0.00315545
AP003419.3	ENSG00000275484	lncRNA	2.16052	8.45572e-16	1.13723e-14
AC093730.1	ENSG00000250775	lncRNA	2.16061	0.00299351	0.00694628
AC124944.2	ENSG00000260261	transcribed_unprocessed_pseudogene	2.16137	4.92997e-32	3.28879e-30
AL138760.1	ENSG00000235939	lncRNA	2.16259	0.000157915	0.000469147
AC114786.1	ENSG00000249763	processed_pseudogene	2.16299	3.36535e-06	1.31556e-05
H2BC19P	ENSG00000220323	transcribed_unprocessed_pseudogene	2.16362	3.36539e-12	2.97258e-11
CIP2A	ENSG00000163507	protein_coding	2.16394	2.51371e-32	1.70469e-30
TIGD3	ENSG00000173825	protein_coding	2.16455	1.5436e-23	4.53644e-22
MAD2L1	ENSG00000164109	protein_coding	2.16528	1.0153e-42	1.43797e-40
GRM5	ENSG00000168959	protein_coding	2.16551	0.00087816	0.00226722
ADM2	ENSG00000128165	protein_coding	2.16554	1.05453e-25	3.84475e-24
AC005829.1	ENSG00000261575	transcribed_unprocessed_pseudogene	2.1665	9.10027e-19	1.70192e-17
GAREM2	ENSG00000157833	protein_coding	2.16666	1.95949e-21	4.80082e-20
NMB	ENSG00000197696	protein_coding	2.16784	1.18867e-29	6.42752e-28
DDX59-AS1	ENSG00000260088	lncRNA	2.16823	7.48981e-10	4.91368e-09
TPSP2	ENSG00000260284	unprocessed_pseudogene	2.16841	2.11074e-17	3.37353e-16
AC006460.1	ENSG00000228509	lncRNA	2.16886	4.13746e-08	2.13237e-07
TNNT2	ENSG00000118194	protein_coding	2.16906	7.01696e-11	5.23168e-10
MYLK-AS1	ENSG00000239523	lncRNA	2.16914	3.88288e-34	3.00385e-32
FMN2	ENSG00000155816	protein_coding	2.16982	4.70664e-05	0.000152756
SRRM4	ENSG00000139767	protein_coding	2.16986	1.20295e-05	4.29947e-05
AL356310.1	ENSG00000228792	lncRNA	2.17001	6.54429e-07	2.83481e-06
TSPO2	ENSG00000112212	protein_coding	2.17027	6.25346e-19	1.187e-17
AKR1C7P	ENSG00000215267	transcribed_unprocessed_pseudogene	2.17105	1.45759e-16	2.13331e-15
AC011933.3	ENSG00000265342	lncRNA	2.17119	1.6045e-09	1.00757e-08
DPF1	ENSG00000011332	protein_coding	2.17155	1.97482e-14	2.28028e-13
AC106820.2	ENSG00000259895	lncRNA	2.17223	1.31037e-10	9.43921e-10
LINC01311	ENSG00000260924	lncRNA	2.17238	3.17997e-34	2.47567e-32
NACAP5	ENSG00000249488	processed_pseudogene	2.1733	7.37521e-05	0.000231708
CHCHD2P7	ENSG00000249973	processed_pseudogene	2.17335	1.8289e-05	6.34454e-05
FAM242C	ENSG00000250432	lncRNA	2.17378	6.38007e-07	2.7679e-06
C2orf27AP1	ENSG00000273693	processed_pseudogene	2.17424	0.000162215	0.000481029
TSPEAR-AS1	ENSG00000235890	lncRNA	2.17577	3.21219e-15	4.0634e-14
AC010247.2	ENSG00000259436	lncRNA	2.17601	1.69303e-10	1.20262e-09
PDE1C	ENSG00000154678	protein_coding	2.17626	2.81588e-18	4.96848e-17
LYZ	ENSG00000090382	protein_coding	2.17709	2.50601e-13	2.53799e-12
AC078860.2	ENSG00000257761	lncRNA	2.17864	1.4692e-05	5.18516e-05
SRGAP3-AS4	ENSG00000235830	lncRNA	2.17899	0.00191881	0.00462424
AL121835.2	ENSG00000279565	TEC	2.17907	0.00050368	0.0013579
AC093916.1	ENSG00000251598	lncRNA	2.17923	3.66541e-06	1.42379e-05
CCNF	ENSG00000162063	protein_coding	2.17944	2.84456e-50	5.9856e-48
PPP1R14BP2	ENSG00000213082	processed_pseudogene	2.17957	6.7794e-10	4.46991e-09
ZNF296	ENSG00000170684	protein_coding	2.17963	1.62609e-22	4.38997e-21
MAPK12	ENSG00000188130	protein_coding	2.1797	2.33618e-23	6.78451e-22
AL033380.1	ENSG00000226454	lncRNA	2.18003	6.83788e-06	2.54547e-05
U73166.1	ENSG00000230454	lncRNA	2.18237	5.81661e-27	2.40959e-25
AC107959.3	ENSG00000253616	lncRNA	2.18294	1.33688e-14	1.57635e-13
AC092757.3	ENSG00000277144	lncRNA	2.18297	1.9103e-11	1.53458e-10
SNORD60	ENSG00000206630	snoRNA	2.18411	1.83198e-13	1.8955e-12
AC008892.1	ENSG00000249236	lncRNA	2.18422	2.00596e-06	8.12087e-06
CDH24	ENSG00000139880	protein_coding	2.18442	5.58854e-41	7.04769e-39
AC010201.1	ENSG00000271259	lncRNA	2.18444	4.27535e-12	3.73246e-11
MIR3150BHG	ENSG00000245080	lncRNA	2.18459	6.37391e-08	3.2126e-07
CENPU	ENSG00000151725	protein_coding	2.18467	2.06425e-40	2.50046e-38
DGKI	ENSG00000157680	protein_coding	2.18468	2.01131e-26	7.90442e-25
GMNN	ENSG00000112312	protein_coding	2.18475	2.59442e-51	6.04665e-49
TNFRSF19	ENSG00000127863	protein_coding	2.18537	2.17301e-11	1.73276e-10
DNAH8	ENSG00000124721	protein_coding	2.18624	1.54806e-11	1.25785e-10
CEACAM5	ENSG00000105388	protein_coding	2.1869	0.000823575	0.00213723
DDN	ENSG00000181418	protein_coding	2.18713	4.27404e-09	2.52183e-08
AC126603.1	ENSG00000258628	unprocessed_pseudogene	2.18728	3.10043e-08	1.62798e-07
MIR548AA1	ENSG00000207704	miRNA	2.18799	6.61102e-08	3.32847e-07
H2BC8	ENSG00000273802	protein_coding	2.19003	5.90428e-19	1.12594e-17
FLVCR1	ENSG00000162769	protein_coding	2.19059	3.6687e-59	1.18506e-56
AP001099.1	ENSG00000265728	lncRNA	2.19082	1.77652e-05	6.17622e-05
FMO1	ENSG00000010932	protein_coding	2.19399	1.85699e-10	1.31377e-09
AL136162.1	ENSG00000271888	lncRNA	2.19414	7.00598e-27	2.87292e-25
SYT5	ENSG00000129990	protein_coding	2.19481	8.11327e-11	5.99926e-10
AC112484.3	ENSG00000261159	lncRNA	2.19485	5.62868e-22	1.4454e-20
LRP4-AS1	ENSG00000247675	lncRNA	2.1954	4.46674e-11	3.41252e-10
SLC25A24P1	ENSG00000241361	transcribed_unprocessed_pseudogene	2.19588	0.000794809	0.00206829
KIF11	ENSG00000138160	protein_coding	2.19654	3.57997e-42	4.9007e-40
AC009005.1	ENSG00000267751	lncRNA	2.19688	5.00732e-25	1.68392e-23
DCST1	ENSG00000163357	protein_coding	2.19998	5.68439e-23	1.604e-21
DIPK2B	ENSG00000147113	protein_coding	2.20041	1.41027e-74	1.08191e-71
KRTAP5-7	ENSG00000244411	protein_coding	2.20049	1.02475e-06	4.31609e-06
AL137159.1	ENSG00000229635	processed_pseudogene	2.20103	9.08014e-14	9.65541e-13
VENTXP5	ENSG00000253569	processed_pseudogene	2.20134	0.00389885	0.008827
TMEM155	ENSG00000164112	protein_coding	2.20188	7.57715e-08	3.78179e-07
AP000842.3	ENSG00000260209	lncRNA	2.2026	2.36074e-07	1.09389e-06
AC011352.3	ENSG00000251320	lncRNA	2.20292	2.35577e-06	9.41897e-06
ANKRD34B	ENSG00000189127	protein_coding	2.20308	7.49457e-05	0.000235337
FANCD2	ENSG00000144554	protein_coding	2.20367	2.50968e-43	3.65282e-41
PTK7	ENSG00000112655	protein_coding	2.20412	3.69401e-17	5.75903e-16
AC139783.1	ENSG00000250767	processed_pseudogene	2.20502	1.07357e-05	3.86668e-05
AL033381.2	ENSG00000270937	lncRNA	2.20523	0.000152092	0.000453382
LINC01559	ENSG00000180861	lncRNA	2.20563	7.56113e-05	0.000237346
AC009065.1	ENSG00000259780	lncRNA	2.20589	5.85198e-07	2.55475e-06
INKA2-AS1	ENSG00000227811	lncRNA	2.20834	3.83144e-10	2.60889e-09
LINC01572	ENSG00000261008	lncRNA	2.20854	8.40015e-16	1.13017e-14
PLEKHS1	ENSG00000148735	protein_coding	2.21004	6.17526e-09	3.56926e-08
AL359075.1	ENSG00000276563	processed_pseudogene	2.21071	5.09042e-11	3.86414e-10
AP003390.1	ENSG00000254854	lncRNA	2.21123	1.47347e-11	1.20228e-10
EMC3-AS1	ENSG00000180385	transcribed_unprocessed_pseudogene	2.21262	5.74242e-33	4.08222e-31
PIP	ENSG00000159763	protein_coding	2.21431	0.000200358	0.000583103
CDC37P2	ENSG00000261089	processed_pseudogene	2.2151	5.40949e-10	3.60672e-09
GPR1	ENSG00000183671	protein_coding	2.21597	9.81124e-09	5.50914e-08
TMEM150B	ENSG00000180061	protein_coding	2.21628	1.03331e-21	2.60264e-20
VN1R85P	ENSG00000269345	unprocessed_pseudogene	2.21691	5.65243e-05	0.000181072
RASL12	ENSG00000103710	protein_coding	2.21706	7.82351e-45	1.22593e-42
AP005264.5	ENSG00000267733	transcribed_processed_pseudogene	2.21777	7.67581e-07	3.28782e-06
AL031777.1	ENSG00000217275	processed_pseudogene	2.21833	6.30181e-15	7.70189e-14
RPL12P35	ENSG00000243007	processed_pseudogene	2.21934	6.35326e-12	5.41933e-11
AC100791.2	ENSG00000262768	lncRNA	2.21941	1.90973e-05	6.60256e-05
U47924.3	ENSG00000275703	lncRNA	2.21955	4.31644e-12	3.76566e-11
RNA5SP79	ENSG00000202063	rRNA_pseudogene	2.21979	1.50922e-05	5.31672e-05
AC099518.2	ENSG00000261357	lncRNA	2.21993	5.21131e-10	3.48722e-09
ZNF534	ENSG00000198633	protein_coding	2.22038	1.80307e-06	7.34226e-06
AC024941.2	ENSG00000281333	lncRNA	2.2205	1.22149e-08	6.76799e-08
LINC01424	ENSG00000236519	lncRNA	2.22072	4.91094e-13	4.8032e-12
DEFB132	ENSG00000186458	protein_coding	2.221	7.58314e-08	3.78427e-07
RNY3P8	ENSG00000223298	misc_RNA	2.2213	6.25919e-10	4.14473e-09
AL445524.1	ENSG00000233461	lncRNA	2.22205	3.96847e-27	1.67394e-25
RCOR2	ENSG00000167771	protein_coding	2.22379	1.44858e-12	1.33824e-11
WDR76	ENSG00000092470	protein_coding	2.22382	1.52069e-39	1.73907e-37
AL161729.4	ENSG00000271659	lncRNA	2.2247	1.19654e-09	7.64031e-09
NHLH2	ENSG00000177551	protein_coding	2.22506	0.00441835	0.00988465
NAT8L	ENSG00000185818	protein_coding	2.226	3.26386e-12	2.89053e-11
AC024361.1	ENSG00000262410	lncRNA	2.22627	1.71705e-27	7.50043e-26
DCAF12L2	ENSG00000198354	protein_coding	2.22698	0.00167523	0.00409211
AL355987.4	ENSG00000273066	lncRNA	2.22827	8.70688e-18	1.44947e-16
VSX1	ENSG00000100987	protein_coding	2.22833	2.32655e-11	1.846e-10
CACNA1B	ENSG00000148408	protein_coding	2.22868	1.89965e-05	6.57019e-05
MSH5	ENSG00000204410	protein_coding	2.23001	1.85085e-35	1.59242e-33
PLEKHG4	ENSG00000196155	protein_coding	2.23116	7.85957e-16	1.0621e-14
ADRA1D	ENSG00000171873	protein_coding	2.23233	8.49356e-09	4.8207e-08
FERMT1	ENSG00000101311	protein_coding	2.23276	2.1007e-13	2.15357e-12
ZNF648	ENSG00000179930	protein_coding	2.2328	2.49161e-11	1.97144e-10
TAGLN3	ENSG00000144834	protein_coding	2.23334	8.98638e-06	3.27995e-05
AC024940.1	ENSG00000177359	transcribed_unprocessed_pseudogene	2.23337	2.89598e-08	1.52803e-07
H3C4	ENSG00000197409	protein_coding	2.235	1.08654e-19	2.22528e-18
LINC01807	ENSG00000232023	lncRNA	2.23609	6.66925e-06	2.48773e-05
AC004263.1	ENSG00000275936	lncRNA	2.23683	2.60576e-16	3.70624e-15
LINC01151	ENSG00000253819	lncRNA	2.23783	1.24694e-12	1.16571e-11
AC009097.2	ENSG00000260593	lncRNA	2.23797	4.54334e-07	2.01838e-06
LINC02242	ENSG00000249736	lncRNA	2.2381	5.19432e-05	0.000167507
KLK13	ENSG00000167759	protein_coding	2.23812	0.000341698	0.00095345
LY6K	ENSG00000160886	protein_coding	2.24027	2.41166e-09	1.47471e-08
OIP5	ENSG00000104147	protein_coding	2.2403	2.19326e-37	2.15372e-35
OPRPN	ENSG00000171199	protein_coding	2.24031	3.03829e-07	1.38571e-06
AC005393.1	ENSG00000276445	lncRNA	2.24122	4.76338e-16	6.57201e-15
EDARADD	ENSG00000186197	protein_coding	2.24257	5.45214e-14	5.95225e-13
LINC02636	ENSG00000224222	lncRNA	2.24259	1.94191e-05	6.70436e-05
SCGB1A1	ENSG00000149021	protein_coding	2.24302	0.000387921	0.00106994
TRAPPC13P1	ENSG00000235447	processed_pseudogene	2.24368	1.1019e-08	6.14607e-08
AC080037.2	ENSG00000263893	lncRNA	2.24388	0.000123243	0.000373462
PLK5	ENSG00000185988	protein_coding	2.24406	1.72137e-11	1.38887e-10
NAV3	ENSG00000067798	protein_coding	2.24437	8.48797e-14	9.06237e-13
CA9	ENSG00000107159	protein_coding	2.24479	3.51884e-07	1.59284e-06
AL121832.3	ENSG00000275437	lncRNA	2.24654	3.0252e-23	8.70993e-22
AC124067.2	ENSG00000253414	lncRNA	2.24697	3.1239e-10	2.15259e-09
AC141557.2	ENSG00000278635	unprocessed_pseudogene	2.24815	5.55964e-11	4.19697e-10
AC009148.1	ENSG00000260495	lncRNA	2.24833	4.66386e-18	8.00288e-17
AC010643.1	ENSG00000268686	lncRNA	2.24843	1.33133e-12	1.23957e-11
Z82246.1	ENSG00000236054	lncRNA	2.24869	2.68021e-10	1.86043e-09
DNTT	ENSG00000107447	protein_coding	2.24891	0.000446498	0.00121746
CA10	ENSG00000154975	protein_coding	2.25056	3.17256e-06	1.24575e-05
LINC01012	ENSG00000281706	lncRNA	2.25103	4.47622e-07	1.99121e-06
AC011944.1	ENSG00000177699	lncRNA	2.25229	2.9837e-08	1.57094e-07
STXBP5L	ENSG00000145087	protein_coding	2.25231	0.000155689	0.000463019
NUSAP1	ENSG00000137804	protein_coding	2.25242	1.86564e-46	3.21029e-44
LINC01480	ENSG00000270164	lncRNA	2.25286	9.85106e-13	9.30142e-12
NOTUM	ENSG00000185269	protein_coding	2.25352	1.50856e-08	8.26163e-08
HOXA9	ENSG00000078399	protein_coding	2.25407	8.08276e-10	5.28104e-09
NETO1	ENSG00000166342	protein_coding	2.25499	4.62042e-06	1.76661e-05
BICDL1	ENSG00000135127	protein_coding	2.25506	4.26666e-28	1.95905e-26
AL354984.1	ENSG00000203971	lncRNA	2.25577	1.36698e-05	4.84343e-05
SMPD4P1	ENSG00000223553	transcribed_unprocessed_pseudogene	2.2562	6.09361e-05	0.000194076
AC129492.2	ENSG00000263427	lncRNA	2.25667	0.00149174	0.00367731
EBF3	ENSG00000108001	protein_coding	2.25761	3.49237e-25	1.19742e-23
PSAPL1	ENSG00000178597	protein_coding	2.25769	0.000118457	0.000359907
FANCB	ENSG00000181544	protein_coding	2.25774	1.22824e-27	5.41659e-26
KRT86	ENSG00000170442	protein_coding	2.25782	3.56953e-12	3.1446e-11
AC011773.4	ENSG00000260493	lncRNA	2.25792	1.09912e-09	7.05491e-09
CAP2	ENSG00000112186	protein_coding	2.25816	4.91609e-44	7.35895e-42
FAM72B	ENSG00000188610	protein_coding	2.26022	7.74521e-24	2.3397e-22
VCX3B	ENSG00000205642	protein_coding	2.2604	9.58155e-05	0.000295652
LINC01605	ENSG00000253161	lncRNA	2.26101	1.7579e-07	8.30015e-07
FANCI	ENSG00000140525	protein_coding	2.26148	1.08739e-50	2.39774e-48
PTPRN	ENSG00000054356	protein_coding	2.26205	2.40013e-09	1.46839e-08
LPAR4	ENSG00000147145	protein_coding	2.26317	5.38283e-10	3.59155e-09
AC008554.1	ENSG00000269043	lncRNA	2.26318	5.51699e-06	2.0826e-05
AC093702.1	ENSG00000231156	lncRNA	2.26342	0.00232029	0.00550566
TSSK5P	ENSG00000227473	unitary_pseudogene	2.26348	1.35532e-18	2.48547e-17
IBA57-DT	ENSG00000203684	lncRNA	2.26381	5.4432e-15	6.71042e-14
AC010255.1	ENSG00000247311	lncRNA	2.26394	0.000728503	0.00190949
CDK5R2	ENSG00000171450	protein_coding	2.26467	0.000394402	0.0010866
MIR137HG	ENSG00000225206	lncRNA	2.2652	0.00394743	0.00892547
AC087627.1	ENSG00000253983	lncRNA	2.26559	4.34618e-09	2.56275e-08
RAD51AP1	ENSG00000111247	protein_coding	2.26739	5.00092e-38	5.14396e-36
WASIR2	ENSG00000231439	lncRNA	2.26801	1.94412e-07	9.10005e-07
LENEP	ENSG00000163352	protein_coding	2.26962	4.74286e-10	3.19114e-09
AC009690.1	ENSG00000260729	protein_coding	2.27117	2.48909e-14	2.82983e-13
CHST5	ENSG00000135702	protein_coding	2.27121	0.000108189	0.000331058
KCNH4	ENSG00000089558	protein_coding	2.2716	1.58227e-18	2.87446e-17
AC104986.1	ENSG00000253180	processed_pseudogene	2.27169	1.4015e-10	1.00622e-09
AC011676.1	ENSG00000253307	lncRNA	2.27179	1.61151e-07	7.65409e-07
NETO2	ENSG00000171208	protein_coding	2.272	1.11067e-28	5.42432e-27
SLC9A3P3	ENSG00000226631	processed_pseudogene	2.27219	5.48732e-05	0.000176138
AC111000.2	ENSG00000248763	unprocessed_pseudogene	2.27225	1.87281e-05	6.48527e-05
C21orf58	ENSG00000160298	protein_coding	2.27227	4.40896e-49	8.82366e-47
ANKRD30A	ENSG00000148513	protein_coding	2.27244	4.00216e-05	0.000131292
TRIM45	ENSG00000134253	protein_coding	2.27328	4.46719e-41	5.7118e-39
CDC37P1	ENSG00000259982	processed_pseudogene	2.27341	3.5105e-07	1.58947e-06
IGF2BP2	ENSG00000073792	protein_coding	2.27389	1.51315e-16	2.20762e-15
AC004221.1	ENSG00000267778	lncRNA	2.27407	1.28096e-06	5.32032e-06
DOCK3	ENSG00000088538	protein_coding	2.27409	3.08079e-21	7.38586e-20
AL513327.2	ENSG00000270115	lncRNA	2.27432	4.67178e-11	3.56251e-10
FGF17	ENSG00000158815	protein_coding	2.27451	1.29361e-12	1.2075e-11
SORCS3	ENSG00000156395	protein_coding	2.27536	0.00423339	0.00950609
CFAP61	ENSG00000089101	protein_coding	2.27542	1.86715e-09	1.16103e-08
DUOX1	ENSG00000137857	protein_coding	2.27602	1.07581e-22	2.9564e-21
PANX3	ENSG00000154143	protein_coding	2.27723	0.00025908	0.000738134
MSH4	ENSG00000057468	protein_coding	2.27805	1.47036e-11	1.20001e-10
AL357153.1	ENSG00000245466	lncRNA	2.27848	7.4902e-06	2.76871e-05
RIMS2	ENSG00000176406	protein_coding	2.27958	1.08772e-08	6.07068e-08
LAMA3	ENSG00000053747	protein_coding	2.2801	7.64735e-19	1.44413e-17
ILDR2	ENSG00000143195	protein_coding	2.28014	1.05327e-14	1.25804e-13
PKD1L2	ENSG00000166473	polymorphic_pseudogene	2.28027	1.99197e-13	2.04837e-12
KDM3AP1	ENSG00000233996	processed_pseudogene	2.2805	1.47713e-08	8.10154e-08
ZIM2-AS1	ENSG00000269793	lncRNA	2.28131	4.1288e-08	2.1288e-07
SBK3	ENSG00000231274	protein_coding	2.28329	1.64794e-09	1.03309e-08
CR381653.2	ENSG00000279208	unprocessed_pseudogene	2.2846	4.35195e-09	2.56574e-08
PRRX1	ENSG00000116132	protein_coding	2.28572	3.05392e-22	8.0557e-21
C15orf48	ENSG00000166920	protein_coding	2.28683	7.24583e-14	7.79038e-13
ANKRD30BP2	ENSG00000224309	transcribed_unprocessed_pseudogene	2.28707	0.00300218	0.00696436
PTHLH	ENSG00000087494	protein_coding	2.28708	1.55687e-11	1.26417e-10
AC004080.1	ENSG00000253308	lncRNA	2.28739	0.00310202	0.00717563
MYEF2	ENSG00000104177	protein_coding	2.28741	7.68937e-14	8.24079e-13
AL353747.3	ENSG00000231720	lncRNA	2.28743	3.87594e-05	0.000127538
MIR4653	ENSG00000264425	miRNA	2.28744	2.32168e-11	1.84253e-10
STAM-AS1	ENSG00000260589	lncRNA	2.28759	9.97642e-21	2.2875e-19
ADAM11	ENSG00000073670	protein_coding	2.28968	1.01991e-18	1.89395e-17
LHFPL3-AS1	ENSG00000226869	lncRNA	2.28969	0.000560954	0.00150055
AC245100.1	ENSG00000224481	lncRNA	2.2903	2.73431e-09	1.65988e-08
H2BC9	ENSG00000275713	protein_coding	2.29148	1.61375e-08	8.80367e-08
KIAA1614-AS1	ENSG00000232586	lncRNA	2.29173	9.31998e-13	8.83395e-12
AC007128.2	ENSG00000272328	lncRNA	2.29226	0.00110438	0.00279479
OR2B6	ENSG00000124657	protein_coding	2.29309	8.72495e-16	1.17045e-14
SEMA5B	ENSG00000082684	protein_coding	2.29347	4.59418e-44	6.90515e-42
COL6A4P1	ENSG00000230524	transcribed_unprocessed_pseudogene	2.29407	4.25973e-08	2.1914e-07
CDKN2C	ENSG00000123080	protein_coding	2.2942	4.45269e-46	7.55603e-44
BEST4	ENSG00000142959	protein_coding	2.29633	2.33416e-20	5.1254e-19
ENTPD3	ENSG00000168032	protein_coding	2.29772	5.88863e-09	3.41109e-08
ENPP6	ENSG00000164303	protein_coding	2.29799	6.51368e-10	4.30473e-09
HPDL	ENSG00000186603	protein_coding	2.29803	4.126e-15	5.14514e-14
SNHG25	ENSG00000266402	lncRNA	2.29835	6.33506e-25	2.10924e-23
AC092667.1	ENSG00000230393	lncRNA	2.29867	1.40545e-14	1.65138e-13
NKAIN2	ENSG00000188580	protein_coding	2.29938	3.49451e-09	2.08899e-08
TESMIN	ENSG00000132749	protein_coding	2.30015	7.97906e-31	4.77758e-29
DCX	ENSG00000077279	protein_coding	2.30024	3.69746e-09	2.20102e-08
LRFN2	ENSG00000156564	protein_coding	2.3004	3.12978e-08	1.64175e-07
AC114757.1	ENSG00000250863	lncRNA	2.30231	5.17622e-08	2.63929e-07
F2RL3	ENSG00000127533	protein_coding	2.30248	2.5452e-21	6.17827e-20
FER1L5	ENSG00000249715	protein_coding	2.30252	7.26171e-15	8.82526e-14
RN7SL521P	ENSG00000240877	misc_RNA	2.30273	3.35554e-15	4.23455e-14
AC073842.2	ENSG00000242798	lncRNA	2.30291	1.79781e-18	3.24522e-17
AC016590.1	ENSG00000267605	lncRNA	2.30472	1.42754e-09	9.01216e-09
AC037487.3	ENSG00000272006	processed_pseudogene	2.30549	4.83311e-12	4.18862e-11
DRC1	ENSG00000157856	protein_coding	2.30592	3.4721e-14	3.88503e-13
PPEF1	ENSG00000086717	protein_coding	2.30632	9.51413e-14	1.01023e-12
DAPL1	ENSG00000163331	protein_coding	2.30677	0.000170691	0.000504093
EFHC2	ENSG00000183690	protein_coding	2.30756	1.03033e-07	5.03864e-07
PRAMEF11	ENSG00000239810	protein_coding	2.30759	0.000508609	0.00136998
FIGNL2-DT	ENSG00000259887	lncRNA	2.30797	4.85212e-17	7.48846e-16
PPP1R14C	ENSG00000198729	protein_coding	2.30805	6.10718e-08	3.08577e-07
AC141002.1	ENSG00000271973	lncRNA	2.30918	3.75474e-14	4.18477e-13
AL121899.1	ENSG00000226644	lncRNA	2.30924	6.92989e-26	2.56211e-24
TAC3	ENSG00000166863	protein_coding	2.30987	7.67453e-09	4.38286e-08
TRIM31	ENSG00000204616	protein_coding	2.31128	4.91355e-15	6.0819e-14
ANKRD20A17P	ENSG00000251056	unprocessed_pseudogene	2.31133	0.000106659	0.000326715
BTNL3	ENSG00000168903	protein_coding	2.31174	0.000144775	0.000433077
LINC01509	ENSG00000226825	lncRNA	2.31175	1.02876e-05	3.71547e-05
AC106754.1	ENSG00000260761	lncRNA	2.3127	0.00227041	0.0053981
AC226118.1	ENSG00000249574	lncRNA	2.3133	3.70956e-06	1.43957e-05
TCF15	ENSG00000125878	protein_coding	2.31363	1.4286e-29	7.69103e-28
BNIP3P30	ENSG00000268079	processed_pseudogene	2.3141	3.90523e-05	0.000128364
CAPN13	ENSG00000162949	protein_coding	2.31496	1.32197e-06	5.47768e-06
AOX3P	ENSG00000244301	transcribed_unprocessed_pseudogene	2.31569	1.47941e-13	1.54197e-12
LPAR3	ENSG00000171517	protein_coding	2.31641	6.606e-06	2.46488e-05
CCDC78	ENSG00000162004	protein_coding	2.31689	5.21007e-21	1.23301e-19
LRRC1	ENSG00000137269	protein_coding	2.31736	2.94796e-26	1.1379e-24
FAM96AP2	ENSG00000224566	processed_pseudogene	2.3194	1.77188e-12	1.61624e-11
AL589765.6	ENSG00000269489	lncRNA	2.31999	5.74683e-12	4.93175e-11
AC013470.2	ENSG00000226690	protein_coding	2.32003	1.45772e-05	5.1471e-05
LINC01589	ENSG00000238120	lncRNA	2.3201	6.94857e-07	2.99654e-06
DMC1	ENSG00000100206	protein_coding	2.32026	8.40451e-17	1.26787e-15
LINC02585	ENSG00000228350	lncRNA	2.32106	1.25635e-19	2.56025e-18
ADCY8	ENSG00000155897	protein_coding	2.32161	6.18565e-05	0.000196821
NRG2	ENSG00000158458	protein_coding	2.3219	1.35498e-16	1.99264e-15
CEND1	ENSG00000184524	protein_coding	2.32393	1.29066e-16	1.90413e-15
SPAG6	ENSG00000077327	protein_coding	2.32425	8.32965e-08	4.12439e-07
IGFL2	ENSG00000204866	protein_coding	2.32444	5.87461e-07	2.56311e-06
CDH13	ENSG00000140945	protein_coding	2.32469	4.36839e-63	1.69328e-60
TNFRSF4	ENSG00000186827	protein_coding	2.32533	7.12343e-47	1.26112e-44
PTCHD3P3	ENSG00000219700	processed_pseudogene	2.32546	2.42383e-05	8.23387e-05
RAD51	ENSG00000051180	protein_coding	2.32582	6.53572e-42	8.8158e-40
MIR4300HG	ENSG00000245832	lncRNA	2.32616	0.00100446	0.00256488
TK1	ENSG00000167900	protein_coding	2.32817	8.59757e-44	1.26639e-41
CAPN10-DT	ENSG00000260942	lncRNA	2.32853	3.73456e-52	9.22962e-50
HS3ST5	ENSG00000249853	protein_coding	2.32856	0.00170603	0.00415935
AC010997.5	ENSG00000273248	lncRNA	2.32902	6.13863e-10	4.06709e-09
AC073263.1	ENSG00000217702	lncRNA	2.32985	4.29e-11	3.28892e-10
SNX18P26	ENSG00000227568	processed_pseudogene	2.33053	0.000107128	0.00032799
RNVU1-6	ENSG00000201558	snRNA	2.33086	5.37845e-14	5.8767e-13
SLC44A5	ENSG00000137968	protein_coding	2.33097	1.91908e-10	1.3551e-09
AC079380.1	ENSG00000251388	lncRNA	2.33204	4.35978e-07	1.94152e-06
C7orf77	ENSG00000275356	lncRNA	2.33562	1.32223e-05	4.69616e-05
QRSL1P1	ENSG00000215833	processed_pseudogene	2.33634	5.05276e-08	2.57991e-07
AL157931.1	ENSG00000262198	lncRNA	2.33728	0.00305285	0.00707254
AC107398.3	ENSG00000260918	lncRNA	2.33858	1.55164e-06	6.37694e-06
AC096711.1	ENSG00000249463	lncRNA	2.33884	2.76649e-05	9.3154e-05
ATP2A1-AS1	ENSG00000260442	lncRNA	2.33975	2.94864e-18	5.1779e-17
UTS2R	ENSG00000181408	protein_coding	2.33994	9.83303e-06	3.56284e-05
TLDC2	ENSG00000101342	protein_coding	2.34147	4.63444e-28	2.11211e-26
LINC02416	ENSG00000257924	lncRNA	2.3418	2.2109e-06	8.88898e-06
AC009264.1	ENSG00000234352	lncRNA	2.34212	0.00103686	0.00263901
HERC2P5	ENSG00000260644	transcribed_unprocessed_pseudogene	2.34311	5.28671e-06	2.00183e-05
PVT1	ENSG00000249859	lncRNA	2.34545	3.77695e-29	1.96722e-27
AC012354.2	ENSG00000274520	misc_RNA	2.34599	0.00108179	0.00274333
AC048383.1	ENSG00000259503	lncRNA	2.34782	8.739e-06	3.19568e-05
GJC1	ENSG00000182963	protein_coding	2.34794	3.06329e-43	4.42363e-41
AL356215.1	ENSG00000255521	lncRNA	2.34829	4.19959e-07	1.87739e-06
AC036108.2	ENSG00000261054	lncRNA	2.34889	1.4949e-15	1.95832e-14
LINC01615	ENSG00000223485	lncRNA	2.34923	1.02562e-10	7.49357e-10
AC024937.2	ENSG00000231464	processed_pseudogene	2.35003	4.14927e-08	2.13786e-07
MELTF-AS1	ENSG00000228109	lncRNA	2.3513	4.44448e-27	1.86405e-25
SLC51B	ENSG00000186198	protein_coding	2.3517	7.71125e-16	1.04397e-14
CDH16	ENSG00000166589	protein_coding	2.35465	4.40628e-09	2.59652e-08
OR7E104P	ENSG00000219926	transcribed_unprocessed_pseudogene	2.35567	5.20013e-05	0.000167665
DLG5-AS1	ENSG00000233871	lncRNA	2.35578	8.21073e-28	3.65159e-26
FABP4	ENSG00000170323	protein_coding	2.35699	2.7991e-16	3.96896e-15
ERVMER34-1	ENSG00000226887	protein_coding	2.35851	3.02895e-09	1.82969e-08
PAX3	ENSG00000135903	protein_coding	2.35943	0.00403175	0.00909378
PPIAP77	ENSG00000249092	processed_pseudogene	2.36051	9.43391e-18	1.56837e-16
SLC5A11	ENSG00000158865	protein_coding	2.36095	5.05787e-14	5.54814e-13
BECN2	ENSG00000196289	protein_coding	2.36136	5.35079e-06	2.02484e-05
PRR36	ENSG00000183248	protein_coding	2.36162	2.67374e-20	5.8259e-19
CCDC28B	ENSG00000160050	protein_coding	2.36162	1.53925e-30	8.92622e-29
AL645939.5	ENSG00000272236	lncRNA	2.3624	2.80278e-08	1.48289e-07
LINC01703	ENSG00000225518	lncRNA	2.36275	4.22918e-28	1.94669e-26
H4C10P	ENSG00000217862	processed_pseudogene	2.363	2.43389e-07	1.12567e-06
ADAMDEC1	ENSG00000134028	protein_coding	2.36314	5.11074e-13	4.98801e-12
AC011921.1	ENSG00000259349	lncRNA	2.36352	4.6514e-19	8.9677e-18
TRIM60P17	ENSG00000223558	processed_pseudogene	2.36377	3.14917e-07	1.4345e-06
VASH2	ENSG00000143494	protein_coding	2.36442	5.96399e-24	1.80905e-22
CENPL	ENSG00000120334	protein_coding	2.36536	6.53824e-63	2.45678e-60
AL451050.2	ENSG00000272205	lncRNA	2.36583	3.2856e-23	9.44487e-22
AC007406.2	ENSG00000255746	lncRNA	2.36638	4.97261e-12	4.30041e-11
CHODL	ENSG00000154645	protein_coding	2.36652	3.78748e-09	2.25024e-08
AC026992.2	ENSG00000261634	lncRNA	2.36677	2.09394e-08	1.12417e-07
RNF144A-AS1	ENSG00000228203	lncRNA	2.36735	6.16633e-13	5.96294e-12
AC091931.1	ENSG00000278958	TEC	2.3677	3.37801e-05	0.000112176
AL162431.1	ENSG00000243155	lncRNA	2.36895	4.50733e-38	4.68864e-36
FOXN4	ENSG00000139445	protein_coding	2.36918	3.06459e-10	2.1133e-09
ZIM2	ENSG00000269699	protein_coding	2.37174	3.14739e-06	1.23626e-05
ZP1	ENSG00000149506	protein_coding	2.37231	2.21038e-08	1.18204e-07
MGAM2	ENSG00000257743	protein_coding	2.37329	5.70161e-07	2.49384e-06
KRTAP5-1	ENSG00000205869	protein_coding	2.3737	3.243e-11	2.5317e-10
TMEM61	ENSG00000143001	protein_coding	2.37395	2.77093e-11	2.17702e-10
STIL	ENSG00000123473	protein_coding	2.37566	6.61483e-50	1.36081e-47
AC125421.1	ENSG00000263574	lncRNA	2.37596	5.57143e-05	0.000178728
PCDHGA1	ENSG00000204956	protein_coding	2.37661	1.08896e-17	1.79901e-16
LINC00922	ENSG00000261742	lncRNA	2.37745	0.000360696	0.00100145
FAP	ENSG00000078098	protein_coding	2.37748	3.37052e-18	5.87671e-17
U95743.1	ENSG00000262267	lncRNA	2.37771	0.000292515	0.000825915
AL021807.1	ENSG00000272468	lncRNA	2.37806	1.4473e-18	2.64624e-17
SLC6A2	ENSG00000103546	protein_coding	2.37817	5.95455e-05	0.000190009
AL139002.1	ENSG00000233379	lncRNA	2.37825	0.000216975	0.000627641
SGO2	ENSG00000163535	protein_coding	2.37923	6.49849e-49	1.27968e-46
DEPDC1-AS1	ENSG00000234264	lncRNA	2.38148	3.246e-08	1.69836e-07
CAMK2N2	ENSG00000163888	protein_coding	2.38164	2.50415e-19	4.96564e-18
FOXH1	ENSG00000160973	protein_coding	2.38184	4.9872e-13	4.8739e-12
AC011352.1	ENSG00000248362	lncRNA	2.3823	1.86277e-06	7.56532e-06
C20orf144	ENSG00000149609	protein_coding	2.38264	1.81911e-17	2.92904e-16
AC007064.2	ENSG00000237689	lncRNA	2.38356	1.23865e-05	4.41934e-05
AC025265.3	ENSG00000257766	lncRNA	2.38417	1.68894e-05	5.89622e-05
CPXM1	ENSG00000088882	protein_coding	2.38436	2.79234e-22	7.38157e-21
LINC00316	ENSG00000237664	lncRNA	2.38573	3.46567e-06	1.3519e-05
MCM2	ENSG00000073111	protein_coding	2.38704	9.60603e-45	1.48627e-42
LINC01775	ENSG00000267201	lncRNA	2.38723	4.76185e-11	3.62594e-10
LYG2	ENSG00000185674	protein_coding	2.38728	1.35613e-12	1.2612e-11
ECT2	ENSG00000114346	protein_coding	2.38859	2.54377e-44	3.87073e-42
AC006538.1	ENSG00000261342	lncRNA	2.38905	8.04013e-20	1.67177e-18
FAM83D	ENSG00000101447	protein_coding	2.39195	1.10497e-47	2.07599e-45
CLVS1	ENSG00000177182	protein_coding	2.39318	1.75171e-18	3.16512e-17
KREMEN2	ENSG00000131650	protein_coding	2.39369	1.5383e-15	2.01159e-14
PLA2G4F	ENSG00000168907	protein_coding	2.39414	5.94784e-07	2.59199e-06
AC078850.1	ENSG00000248187	lncRNA	2.39458	5.26343e-09	3.06921e-08
PRRG3	ENSG00000130032	protein_coding	2.39467	1.38453e-23	4.08526e-22
C5orf34	ENSG00000172244	protein_coding	2.39507	6.59863e-57	1.9439e-54
EZH2	ENSG00000106462	protein_coding	2.39561	9.75096e-66	4.60345e-63
FBXL16	ENSG00000127585	protein_coding	2.39636	1.55473e-13	1.61818e-12
OLFML2A	ENSG00000185585	protein_coding	2.3968	3.33144e-47	6.07312e-45
CAPN9	ENSG00000135773	protein_coding	2.39761	1.25549e-15	1.65647e-14
AC009121.3	ENSG00000262703	lncRNA	2.39775	2.97858e-09	1.80133e-08
LINC01731	ENSG00000234283	lncRNA	2.3981	3.47035e-05	0.000115055
CTNND2	ENSG00000169862	protein_coding	2.39903	1.83855e-07	8.65101e-07
SNHG4	ENSG00000281398	lncRNA	2.39985	3.96483e-26	1.50516e-24
KC877373.1	ENSG00000243537	processed_pseudogene	2.40056	8.19307e-09	4.66381e-08
AL356740.3	ENSG00000269376	lncRNA	2.40056	2.46922e-05	8.37492e-05
SERPINB11	ENSG00000206072	protein_coding	2.40118	0.00339382	0.00778572
ZBED2	ENSG00000177494	protein_coding	2.40168	1.46558e-10	1.04916e-09
CNGB3	ENSG00000170289	protein_coding	2.40211	1.51156e-08	8.27682e-08
AC132192.2	ENSG00000268403	lncRNA	2.40245	2.48952e-48	4.79969e-46
LINC02125	ENSG00000250514	lncRNA	2.40295	0.000339526	0.000948324
INAVA	ENSG00000163362	protein_coding	2.40303	7.00347e-14	7.54302e-13
TRPM5	ENSG00000070985	protein_coding	2.40308	1.01154e-08	5.66608e-08
LINC00853	ENSG00000224805	lncRNA	2.40335	9.47886e-29	4.69784e-27
ADIG	ENSG00000182035	protein_coding	2.40398	1.32291e-07	6.3671e-07
AC108865.1	ENSG00000250829	lncRNA	2.40452	6.64564e-05	0.000210366
CCDC197	ENSG00000175699	protein_coding	2.40464	0.0001431	0.000428382
MDFI	ENSG00000112559	protein_coding	2.4047	7.51433e-18	1.25776e-16
LINC02315	ENSG00000251363	lncRNA	2.40491	1.69029e-06	6.90825e-06
SHISA2	ENSG00000180730	protein_coding	2.40628	1.93088e-13	1.99111e-12
AC145207.8	ENSG00000264769	lncRNA	2.40857	1.96356e-13	2.02255e-12
AP005205.2	ENSG00000266441	lncRNA	2.40939	1.7307e-05	6.02945e-05
AL445437.1	ENSG00000279778	TEC	2.40966	1.20255e-10	8.70675e-10
DSG1-AS1	ENSG00000266729	lncRNA	2.40975	0.000332411	0.000930244
TRIM16L	ENSG00000108448	protein_coding	2.40986	1.24081e-21	3.10194e-20
RACGAP1	ENSG00000161800	protein_coding	2.41073	3.15991e-66	1.55147e-63
AL391832.1	ENSG00000237520	lncRNA	2.41189	6.55056e-13	6.32287e-12
MCRIP2P1	ENSG00000241418	processed_pseudogene	2.41191	2.00843e-08	1.08095e-07
AL033384.2	ENSG00000271218	lncRNA	2.4136	2.78947e-10	1.93373e-09
MYHAS	ENSG00000272975	lncRNA	2.41526	3.75094e-05	0.000123657
PURPL	ENSG00000250337	lncRNA	2.41622	4.65532e-14	5.13871e-13
AP000569.1	ENSG00000273102	lncRNA	2.41683	5.09031e-08	2.59692e-07
LINC02568	ENSG00000259459	lncRNA	2.41684	1.73453e-06	7.07804e-06
RPRM	ENSG00000177519	protein_coding	2.4173	0.000111501	0.000340456
LINC00607	ENSG00000235770	lncRNA	2.41821	3.33008e-17	5.21817e-16
SPOCD1	ENSG00000134668	protein_coding	2.41882	1.56204e-18	2.84053e-17
KCNC2	ENSG00000166006	protein_coding	2.41887	1.95772e-05	6.7558e-05
CEMIP	ENSG00000103888	protein_coding	2.41893	6.18474e-19	1.17517e-17
WFDC21P	ENSG00000261040	transcribed_unitary_pseudogene	2.42045	2.16951e-13	2.21978e-12
AC026355.2	ENSG00000228561	lncRNA	2.42291	5.35856e-07	2.3547e-06
CSTL1	ENSG00000125823	protein_coding	2.42334	5.09592e-07	2.24652e-06
BMS1P22	ENSG00000232775	transcribed_unprocessed_pseudogene	2.42468	1.61467e-08	8.80736e-08
HSPB3	ENSG00000169271	protein_coding	2.42643	0.00181107	0.00438986
AC092119.2	ENSG00000274460	lncRNA	2.42783	1.06452e-37	1.07103e-35
LINC02641	ENSG00000230131	lncRNA	2.4279	1.17382e-06	4.89911e-06
AC013244.1	ENSG00000271018	processed_pseudogene	2.42794	9.51607e-09	5.35155e-08
AC023302.1	ENSG00000271983	lncRNA	2.42829	8.41288e-11	6.20958e-10
AC104590.1	ENSG00000259251	lncRNA	2.42883	8.39062e-14	8.96103e-13
LINC00616	ENSG00000248307	lncRNA	2.42973	0.00253727	0.00597242
SYT8	ENSG00000149043	protein_coding	2.4299	9.91429e-10	6.41869e-09
TTC39A-AS1	ENSG00000261664	lncRNA	2.4304	3.3688e-11	2.62434e-10
MRPL40P1	ENSG00000256037	processed_pseudogene	2.43126	4.45459e-11	3.40465e-10
BX322639.1	ENSG00000215146	transcribed_unprocessed_pseudogene	2.43188	8.41195e-15	1.01495e-13
MIR3131	ENSG00000264755	miRNA	2.43198	3.3376e-08	1.74282e-07
LINC00485	ENSG00000258169	lncRNA	2.43229	3.92608e-10	2.66889e-09
HELLS	ENSG00000119969	protein_coding	2.4323	1.35638e-40	1.65938e-38
RPS18P6	ENSG00000244048	processed_pseudogene	2.43294	0.000551517	0.00147735
PPFIA4	ENSG00000143847	protein_coding	2.43396	1.78686e-14	2.077e-13
UBTFL6	ENSG00000228970	unprocessed_pseudogene	2.43491	1.25634e-10	9.07307e-10
AC090116.1	ENSG00000277223	lncRNA	2.43495	2.93277e-05	9.8402e-05
AC090709.1	ENSG00000257191	lncRNA	2.43531	8.2149e-06	3.01511e-05
IFITM5	ENSG00000206013	protein_coding	2.43545	3.68913e-06	1.43209e-05
LINC02802	ENSG00000232527	lncRNA	2.43579	5.27493e-15	6.51388e-14
CHRNB4	ENSG00000117971	protein_coding	2.43631	9.76745e-17	1.46389e-15
MSC	ENSG00000178860	protein_coding	2.43747	7.94499e-14	8.50484e-13
LINC02307	ENSG00000258969	lncRNA	2.43785	0.00180307	0.00437219
AC011447.6	ENSG00000279039	TEC	2.43799	1.59095e-07	7.56425e-07
EXTL1	ENSG00000158008	protein_coding	2.43837	5.77471e-15	7.09773e-14
H2BC7	ENSG00000277224	protein_coding	2.43871	7.4575e-11	5.53436e-10
AC013553.3	ENSG00000277351	lncRNA	2.43919	2.37091e-12	2.13307e-11
AC141557.1	ENSG00000256673	unprocessed_pseudogene	2.43941	9.83973e-18	1.63215e-16
AC233280.1	ENSG00000229178	lncRNA	2.44085	1.70626e-16	2.47173e-15
AP000593.2	ENSG00000228286	processed_pseudogene	2.44086	0.00336028	0.00771873
AL136528.1	ENSG00000227589	lncRNA	2.44177	2.64292e-08	1.40255e-07
C1QTNF1-AS1	ENSG00000265096	lncRNA	2.44181	1.68246e-10	1.19558e-09
SLC6A11	ENSG00000132164	protein_coding	2.44198	3.28141e-07	1.49197e-06
KCNK12	ENSG00000184261	protein_coding	2.44215	3.05466e-08	1.60509e-07
ARX	ENSG00000004848	protein_coding	2.44237	8.2721e-05	0.000258277
OR2H1	ENSG00000204688	protein_coding	2.44439	0.00130909	0.00326421
CNTNAP5	ENSG00000155052	protein_coding	2.44511	0.000212441	0.000615253
USP32P3	ENSG00000189423	transcribed_unprocessed_pseudogene	2.4454	2.99721e-09	1.81201e-08
CD109	ENSG00000156535	protein_coding	2.44631	5.35473e-26	2.01207e-24
SHISA8	ENSG00000234965	protein_coding	2.44737	5.87378e-08	2.97396e-07
PCARE	ENSG00000179270	protein_coding	2.4474	0.00195897	0.00471391
BLM	ENSG00000197299	protein_coding	2.44781	2.48174e-38	2.62609e-36
GCG	ENSG00000115263	protein_coding	2.44787	0.000453055	0.00123388
CCDC162P	ENSG00000203799	transcribed_unitary_pseudogene	2.44918	1.09802e-12	1.03357e-11
LVRN	ENSG00000172901	protein_coding	2.44975	2.305e-12	2.07732e-11
AC010457.1	ENSG00000251257	lncRNA	2.45225	1.45041e-06	5.97918e-06
ZNF98	ENSG00000197360	protein_coding	2.45238	4.26913e-06	1.6427e-05
BCAS1	ENSG00000064787	protein_coding	2.45268	8.55712e-14	9.12826e-13
SYPL1P2	ENSG00000265683	processed_pseudogene	2.4552	3.1142e-18	5.44786e-17
MS4A8	ENSG00000166959	protein_coding	2.45548	8.06698e-05	0.0002523
CACNA1S	ENSG00000081248	protein_coding	2.45672	3.81707e-11	2.94736e-10
ZWINT	ENSG00000122952	protein_coding	2.45707	2.06368e-51	4.87135e-49
KCNH2	ENSG00000055118	protein_coding	2.4575	5.16929e-11	3.92078e-10
SPATA21	ENSG00000187144	protein_coding	2.45778	1.35955e-12	1.26393e-11
AC009292.1	ENSG00000245719	lncRNA	2.45799	1.2214e-07	5.91643e-07
ELOVL3	ENSG00000119915	protein_coding	2.45811	1.53263e-11	1.24613e-10
SERPINA12	ENSG00000165953	protein_coding	2.45816	3.0193e-14	3.40216e-13
PINCR	ENSG00000224294	lncRNA	2.46044	0.00374102	0.00849789
BDKRB1	ENSG00000100739	protein_coding	2.461	2.80351e-19	5.52066e-18
AP000997.2	ENSG00000255599	lncRNA	2.46148	1.64462e-08	8.95878e-08
H2BC16P	ENSG00000217646	processed_pseudogene	2.46164	1.86042e-07	8.73607e-07
ELAVL2	ENSG00000107105	protein_coding	2.46245	1.31254e-11	1.07765e-10
AC010615.2	ENSG00000268119	lncRNA	2.46257	3.89397e-15	4.86733e-14
SSX2B	ENSG00000268447	protein_coding	2.46257	0.000929875	0.00238818
AC006483.2	ENSG00000272719	lncRNA	2.46279	3.23425e-10	2.22281e-09
SCGB2A1	ENSG00000124939	protein_coding	2.46295	7.32059e-09	4.18657e-08
PCLAF	ENSG00000166803	protein_coding	2.46307	1.95547e-46	3.34922e-44
AC122694.1	ENSG00000250122	lncRNA	2.46721	5.73398e-05	0.000183479
AMH	ENSG00000104899	protein_coding	2.46826	1.42215e-14	1.6694e-13
HMX2	ENSG00000188816	protein_coding	2.46847	0.00416891	0.00937491
AC092821.1	ENSG00000214776	transcribed_unprocessed_pseudogene	2.46916	8.49577e-27	3.45307e-25
AL359878.1	ENSG00000205740	lncRNA	2.46922	1.54773e-19	3.14187e-18
CDIPTOSP	ENSG00000214725	transcribed_unitary_pseudogene	2.46961	9.01987e-14	9.59687e-13
AC084864.1	ENSG00000242078	lncRNA	2.47037	5.72991e-07	2.50473e-06
GAL3ST1	ENSG00000128242	protein_coding	2.47143	3.2509e-15	4.10673e-14
TDGF1	ENSG00000241186	protein_coding	2.47147	8.82925e-15	1.06321e-13
LINC00272	ENSG00000203729	lncRNA	2.47322	0.000170435	0.000503416
AC007036.1	ENSG00000227017	lncRNA	2.4739	2.31347e-08	1.23501e-07
AC126564.1	ENSG00000280217	TEC	2.47445	3.05247e-05	0.000102121
AC111000.4	ENSG00000250696	lncRNA	2.47572	1.91205e-26	7.54656e-25
POLD2P1	ENSG00000213730	processed_pseudogene	2.47598	2.68081e-07	1.23244e-06
SP5	ENSG00000204335	protein_coding	2.47676	2.55576e-19	5.05986e-18
PI3	ENSG00000124102	protein_coding	2.47698	5.31116e-10	3.54758e-09
GMCL2	ENSG00000244234	protein_coding	2.47705	1.60194e-05	5.61754e-05
AC002378.1	ENSG00000225676	lncRNA	2.47827	5.19221e-07	2.2876e-06
ANKRD65	ENSG00000235098	protein_coding	2.4797	8.0781e-19	1.52002e-17
HSPA8P13	ENSG00000253425	unprocessed_pseudogene	2.47994	0.00110438	0.00279479
GXYLT2	ENSG00000172986	protein_coding	2.4814	7.90912e-15	9.56471e-14
AL513217.1	ENSG00000223774	lncRNA	2.48191	9.73616e-10	6.30872e-09
LINC02434	ENSG00000248370	lncRNA	2.48302	0.00369156	0.00840006
AC103808.6	ENSG00000266743	lncRNA	2.48373	0.000548339	0.00147001
EPHB2	ENSG00000133216	protein_coding	2.48717	1.31934e-17	2.16407e-16
GAS2L1P2	ENSG00000228376	transcribed_processed_pseudogene	2.48725	4.09719e-07	1.83658e-06
CHST6	ENSG00000183196	protein_coding	2.48804	4.95294e-14	5.44115e-13
AC133644.1	ENSG00000273445	lncRNA	2.48963	1.07384e-11	8.88612e-11
PRR11	ENSG00000068489	protein_coding	2.49016	2.69702e-41	3.52181e-39
AL353708.3	ENSG00000272906	lncRNA	2.49069	1.18587e-33	8.79117e-32
AC009275.1	ENSG00000273297	lncRNA	2.49115	8.61328e-16	1.15757e-14
PCDHB8	ENSG00000120322	protein_coding	2.49223	1.05049e-11	8.70654e-11
IRX3	ENSG00000177508	protein_coding	2.49315	3.13921e-18	5.48899e-17
CCDC170	ENSG00000120262	protein_coding	2.49339	1.38525e-20	3.10661e-19
AC100803.2	ENSG00000244998	lncRNA	2.49411	1.08586e-05	3.90716e-05
AP000829.1	ENSG00000263551	lncRNA	2.49529	3.15573e-05	0.000105336
AC092296.2	ENSG00000267053	lncRNA	2.49552	8.85351e-13	8.40912e-12
AC012236.1	ENSG00000259772	lncRNA	2.49575	3.67617e-20	7.88418e-19
STAU2-AS1	ENSG00000253302	lncRNA	2.4968	3.13446e-19	6.1376e-18
EGFR-AS1	ENSG00000224057	lncRNA	2.497	1.66085e-09	1.03994e-08
AC000067.1	ENSG00000225007	lncRNA	2.49714	2.70365e-12	2.41766e-11
P2RX2	ENSG00000187848	protein_coding	2.49912	2.17678e-06	8.75839e-06
ARID3A	ENSG00000116017	protein_coding	2.49946	6.82875e-25	2.26747e-23
MMP10	ENSG00000166670	protein_coding	2.49982	3.14212e-10	2.16433e-09
H2AC17	ENSG00000278677	protein_coding	2.50099	1.53283e-20	3.41883e-19
SCTR-AS1	ENSG00000231013	lncRNA	2.50195	1.50965e-15	1.97552e-14
SLC4A3	ENSG00000114923	protein_coding	2.502	1.64129e-12	1.50308e-11
RNU6-725P	ENSG00000252371	snRNA	2.50296	0.000380978	0.00105292
AC020658.4	ENSG00000273786	lncRNA	2.50333	1.08537e-09	6.97758e-09
AL133372.2	ENSG00000248975	lncRNA	2.5039	0.00354369	0.00809407
AL358473.1	ENSG00000229191	lncRNA	2.5043	3.97427e-09	2.35514e-08
AC026740.1	ENSG00000271781	lncRNA	2.50471	1.33211e-24	4.30293e-23
TOB2P1	ENSG00000176933	processed_pseudogene	2.50599	4.10711e-30	2.29848e-28
H2BC13	ENSG00000185130	protein_coding	2.50624	1.83387e-11	1.47608e-10
PYCR1	ENSG00000183010	protein_coding	2.50674	2.93631e-18	5.16117e-17
Z97192.2	ENSG00000213279	lncRNA	2.50796	6.46389e-12	5.50529e-11
P2RY4	ENSG00000186912	protein_coding	2.50814	7.01595e-07	3.02418e-06
AC122685.1	ENSG00000258763	lncRNA	2.50816	0.000765645	0.00199873
AC130686.1	ENSG00000278954	TEC	2.51015	7.18261e-11	5.3476e-10
KRT23	ENSG00000108244	protein_coding	2.51072	2.08007e-09	1.28582e-08
PYDC1	ENSG00000169900	protein_coding	2.51128	0.000179487	0.000527953
H4C5	ENSG00000276966	protein_coding	2.5116	2.47976e-16	3.53385e-15
AF254983.1	ENSG00000273840	lncRNA	2.51437	0.00249597	0.00588497
FMO8P	ENSG00000238087	unprocessed_pseudogene	2.51508	0.0014936	0.00368093
CSPG5	ENSG00000114646	protein_coding	2.51509	9.01863e-30	4.92003e-28
EPHA5	ENSG00000145242	protein_coding	2.51526	0.00142607	0.00353104
NRSN1	ENSG00000152954	protein_coding	2.51543	1.75402e-05	6.10145e-05
CDH18	ENSG00000145526	protein_coding	2.51607	0.000455303	0.00123945
AL590705.1	ENSG00000203279	lncRNA	2.51709	1.99511e-17	3.19426e-16
MT-TM	ENSG00000210112	Mt_tRNA	2.51759	1.74268e-08	9.45661e-08
DLGAP1-AS5	ENSG00000261520	lncRNA	2.51771	0.0026713	0.00626348
AP005271.1	ENSG00000265554	lncRNA	2.5183	0.000156031	0.00046396
AC024560.2	ENSG00000249626	processed_pseudogene	2.52084	3.46951e-19	6.76342e-18
FGD5P1	ENSG00000275340	transcribed_unprocessed_pseudogene	2.52129	5.79487e-06	2.18057e-05
AC005993.1	ENSG00000266869	lncRNA	2.52218	0.00143835	0.00355739
LINC02211	ENSG00000245662	lncRNA	2.52327	3.37515e-05	0.000112091
AL122126.2	ENSG00000258065	processed_pseudogene	2.52363	0.000383583	0.00105925
SBSN	ENSG00000189001	protein_coding	2.52421	2.00954e-06	8.1336e-06
GPR19	ENSG00000183150	protein_coding	2.52604	1.60226e-28	7.67249e-27
VN1R51P	ENSG00000228038	processed_pseudogene	2.52711	7.93831e-08	3.94707e-07
OLFM3	ENSG00000118733	protein_coding	2.52718	0.000564972	0.00151031
LHX4	ENSG00000121454	protein_coding	2.52774	5.01778e-35	4.16159e-33
AC011445.1	ENSG00000269246	lncRNA	2.52799	9.44526e-21	2.17383e-19
SCRT1	ENSG00000261678	protein_coding	2.52802	3.45693e-11	2.68788e-10
AP000526.1	ENSG00000271127	transcribed_unprocessed_pseudogene	2.52916	1.3545e-08	7.45341e-08
LINC01762	ENSG00000233154	lncRNA	2.52963	7.70492e-17	1.16808e-15
TRIM7	ENSG00000146054	protein_coding	2.53122	3.98619e-26	1.51172e-24
AL035446.1	ENSG00000234147	lncRNA	2.53155	1.52462e-10	1.08846e-09
ARHGAP11A	ENSG00000198826	protein_coding	2.53511	6.90254e-52	1.67223e-49
AP000757.2	ENSG00000254844	lncRNA	2.53517	1.13959e-06	4.76651e-06
AC092969.1	ENSG00000240086	lncRNA	2.53528	0.000347218	0.000967737
TUBAL3	ENSG00000178462	protein_coding	2.53554	6.50952e-05	0.000206427
CU104787.1	ENSG00000279973	lncRNA	2.53586	0.00430928	0.00966294
AL021997.2	ENSG00000273712	processed_pseudogene	2.53636	1.10209e-09	7.07153e-09
TMEM151B	ENSG00000178233	protein_coding	2.53664	3.3722e-13	3.35073e-12
SOX21-AS1	ENSG00000227640	lncRNA	2.53669	2.54313e-06	1.01219e-05
IGSF3	ENSG00000143061	protein_coding	2.53711	6.01539e-29	3.04463e-27
GDNF-AS1	ENSG00000248587	lncRNA	2.53747	4.34541e-10	2.93714e-09
AC092343.1	ENSG00000247345	lncRNA	2.53786	0.00110048	0.00278573
LINGO1	ENSG00000169783	protein_coding	2.53866	1.98033e-22	5.31126e-21
THY1	ENSG00000154096	protein_coding	2.53985	1.94533e-55	5.34589e-53
ICAM5	ENSG00000105376	protein_coding	2.54036	1.97896e-12	1.79624e-11
MCOLN3	ENSG00000055732	protein_coding	2.54076	3.57222e-10	2.44096e-09
LINC02577	ENSG00000228742	lncRNA	2.54317	2.10946e-05	7.24009e-05
GABRR1	ENSG00000146276	protein_coding	2.54383	1.33726e-06	5.53669e-06
AL118505.1	ENSG00000278192	lncRNA	2.54481	5.32829e-11	4.03141e-10
SLITRK1	ENSG00000178235	protein_coding	2.54639	0.0014247	0.00352835
CCKBR	ENSG00000110148	protein_coding	2.54651	0.000331846	0.000929002
AL355388.1	ENSG00000273002	lncRNA	2.54711	8.23638e-18	1.37362e-16
DNASE1L2	ENSG00000167968	protein_coding	2.54802	1.03102e-22	2.84178e-21
ATP6V0D2	ENSG00000147614	protein_coding	2.54837	2.02671e-14	2.33589e-13
RNA5SP18	ENSG00000212237	rRNA_pseudogene	2.54941	3.8599e-06	1.49366e-05
WDR62	ENSG00000075702	protein_coding	2.54957	3.33598e-49	6.71279e-47
LINC01136	ENSG00000233791	lncRNA	2.5496	1.18617e-16	1.75914e-15
ERVV-2	ENSG00000268964	protein_coding	2.5498	0.00416724	0.00937185
RNF157	ENSG00000141576	protein_coding	2.55037	3.36414e-30	1.90294e-28
AL359881.3	ENSG00000270171	lncRNA	2.55081	2.15518e-05	7.38117e-05
AL022324.3	ENSG00000272942	lncRNA	2.55233	5.43232e-07	2.38426e-06
SLC12A1	ENSG00000074803	protein_coding	2.55319	1.17265e-07	5.68852e-07
CRYBG2	ENSG00000176092	protein_coding	2.55374	3.11809e-31	1.95273e-29
LINC01970	ENSG00000265692	lncRNA	2.554	6.27401e-20	1.31419e-18
LINC00941	ENSG00000235884	lncRNA	2.55494	5.89546e-13	5.71887e-12
PNMA6F	ENSG00000225110	protein_coding	2.5576	0.000692678	0.00182363
AC022296.4	ENSG00000272832	lncRNA	2.55811	3.69606e-10	2.51904e-09
SLC12A5-AS1	ENSG00000204044	lncRNA	2.55822	8.19251e-16	1.10506e-14
LINC00601	ENSG00000235180	lncRNA	2.55822	0.00143085	0.00354145
AC092171.4	ENSG00000272953	lncRNA	2.55946	3.53236e-31	2.20094e-29
ONECUT3	ENSG00000205922	protein_coding	2.56047	2.96733e-08	1.56255e-07
UBD	ENSG00000213886	protein_coding	2.56098	2.59412e-27	1.11596e-25
AC073111.1	ENSG00000239377	lncRNA	2.5615	2.37251e-14	2.70397e-13
PTP4A3	ENSG00000184489	protein_coding	2.56155	1.8861e-33	1.38354e-31
PCDHA2	ENSG00000204969	protein_coding	2.56272	2.89684e-06	1.14395e-05
GUCA2A	ENSG00000197273	protein_coding	2.56283	4.58832e-08	2.35026e-07
CASP14	ENSG00000105141	protein_coding	2.56383	0.000558137	0.00149366
RASGRF1	ENSG00000058335	protein_coding	2.56398	1.05604e-15	1.40388e-14
NUS1P2	ENSG00000234685	processed_pseudogene	2.56407	0.00052052	0.00139991
BEX2	ENSG00000133134	protein_coding	2.56499	4.46536e-13	4.38253e-12
AC145207.9	ENSG00000278876	TEC	2.56618	5.91565e-31	3.60062e-29
AC011005.4	ENSG00000243230	lncRNA	2.56669	2.89984e-19	5.69816e-18
AP000561.1	ENSG00000226043	lncRNA	2.56673	9.28703e-07	3.93132e-06
AC008875.1	ENSG00000271788	lncRNA	2.56876	1.01272e-14	1.21237e-13
HOXD11	ENSG00000128713	protein_coding	2.56978	0.000693225	0.00182481
CHAF1B	ENSG00000159259	protein_coding	2.57028	1.34635e-42	1.88509e-40
DPYSL5	ENSG00000157851	protein_coding	2.5708	6.37715e-06	2.38554e-05
DNAJC6	ENSG00000116675	protein_coding	2.57105	4.30426e-36	3.83778e-34
CLPSL2	ENSG00000196748	protein_coding	2.5714	8.76685e-05	0.000272454
AC016773.2	ENSG00000270195	lncRNA	2.57217	9.57658e-32	6.27487e-30
RBM24	ENSG00000112183	protein_coding	2.57289	8.86921e-27	3.60088e-25
FZD10	ENSG00000111432	protein_coding	2.57448	8.2948e-13	7.89914e-12
SLC66A1L	ENSG00000174899	transcribed_unitary_pseudogene	2.57484	6.07212e-07	2.6424e-06
TDRG1	ENSG00000204091	lncRNA	2.57545	0.000139739	0.00041883
LINC01096	ENSG00000246095	lncRNA	2.57726	0.00183501	0.00444029
ITPKA	ENSG00000137825	protein_coding	2.57744	3.93982e-31	2.43832e-29
CENPW	ENSG00000203760	protein_coding	2.57806	3.39711e-50	7.10768e-48
RNF157-AS1	ENSG00000267128	lncRNA	2.58041	1.30758e-15	1.72212e-14
CLDN18	ENSG00000066405	protein_coding	2.58061	6.42934e-11	4.82285e-10
SOX21	ENSG00000125285	protein_coding	2.5812	1.60667e-06	6.58767e-06
MAGEC3	ENSG00000165509	protein_coding	2.58139	0.000349367	0.000973228
C17orf99	ENSG00000187997	protein_coding	2.58142	5.93465e-09	3.43522e-08
EDIL3	ENSG00000164176	protein_coding	2.58412	1.26737e-32	8.69084e-31
AC010307.4	ENSG00000250244	lncRNA	2.58429	8.09091e-06	2.97434e-05
RGS20	ENSG00000147509	protein_coding	2.5861	9.53351e-14	1.012e-12
RPS27P25	ENSG00000239881	transcribed_processed_pseudogene	2.58802	9.17973e-08	4.52039e-07
AC096637.2	ENSG00000231057	lncRNA	2.5882	5.10033e-11	3.87087e-10
KCNJ9	ENSG00000162728	protein_coding	2.58857	3.86231e-08	2.00036e-07
GRIK4	ENSG00000149403	protein_coding	2.5898	2.29989e-14	2.62772e-13
AL031864.1	ENSG00000213060	processed_pseudogene	2.59063	1.37433e-12	1.27605e-11
H4C8	ENSG00000158406	protein_coding	2.5915	4.08225e-25	1.38548e-23
AC092171.2	ENSG00000230733	lncRNA	2.59339	7.26856e-65	3.11229e-62
KCNN1	ENSG00000105642	protein_coding	2.59349	1.00495e-16	1.50431e-15
LINC01483	ENSG00000227517	lncRNA	2.59354	1.11818e-06	4.68386e-06
GPRIN1	ENSG00000169258	protein_coding	2.59498	3.404e-40	4.05659e-38
AC092954.1	ENSG00000272797	lncRNA	2.5979	7.43427e-06	2.74942e-05
AC083849.1	ENSG00000199370	snoRNA	2.59798	4.03684e-06	1.55771e-05
CDH7	ENSG00000081138	protein_coding	2.59806	2.69152e-05	9.07624e-05
FAM111B	ENSG00000189057	protein_coding	2.59814	2.05573e-39	2.32924e-37
G6PD	ENSG00000160211	protein_coding	2.5986	5.38125e-34	4.10267e-32
LINC02600	ENSG00000250986	lncRNA	2.59861	7.94551e-13	7.59568e-12
AP000769.1	ENSG00000173727	transcribed_unprocessed_pseudogene	2.5999	1.73256e-22	4.65693e-21
LRRC52-AS1	ENSG00000237463	lncRNA	2.60086	0.000237213	0.000680731
GPR119	ENSG00000147262	protein_coding	2.60215	0.000560902	0.00150052
UPK1A	ENSG00000105668	protein_coding	2.60238	5.11339e-14	5.6057e-13
SLC30A2	ENSG00000158014	protein_coding	2.60294	1.14816e-10	8.3261e-10
AL031736.1	ENSG00000227777	processed_pseudogene	2.60314	5.25717e-06	1.99105e-05
AL590652.1	ENSG00000227885	lncRNA	2.60347	2.13465e-12	1.93041e-11
AC018809.1	ENSG00000269894	lncRNA	2.60403	1.44917e-23	4.26573e-22
LINC02202	ENSG00000245812	lncRNA	2.60908	4.37299e-26	1.6533e-24
TNP1	ENSG00000118245	protein_coding	2.61078	0.0016602	0.00405863
CNNM1	ENSG00000119946	protein_coding	2.61112	1.60031e-13	1.66328e-12
AC003973.2	ENSG00000279377	TEC	2.6118	1.35814e-14	1.59886e-13
ARHGAP40	ENSG00000124143	protein_coding	2.61261	1.04696e-07	5.11316e-07
TAL2	ENSG00000186051	protein_coding	2.61288	7.06558e-16	9.59023e-15
IL17B	ENSG00000127743	protein_coding	2.61416	1.28139e-11	1.05373e-10
ASB15	ENSG00000146809	protein_coding	2.61462	8.45446e-08	4.18338e-07
MRLN	ENSG00000227877	protein_coding	2.61643	2.40863e-05	8.18449e-05
AC132872.2	ENSG00000264548	lncRNA	2.61661	2.82619e-20	6.13629e-19
LINC02804	ENSG00000274372	lncRNA	2.6171	7.71551e-13	7.38539e-12
SLC25A34-AS1	ENSG00000224459	lncRNA	2.61782	1.95294e-11	1.56678e-10
C19orf67	ENSG00000188032	protein_coding	2.61814	2.04156e-13	2.09703e-12
AL356234.1	ENSG00000220412	processed_pseudogene	2.61915	1.03209e-08	5.77244e-08
LINC01675	ENSG00000234142	lncRNA	2.62023	9.12169e-10	5.92934e-09
C1orf61	ENSG00000125462	protein_coding	2.62261	3.14609e-15	3.98389e-14
CELF3	ENSG00000159409	protein_coding	2.62399	4.66837e-12	4.05827e-11
TPT1P8	ENSG00000219491	transcribed_processed_pseudogene	2.62654	7.2981e-05	0.000229501
GRIN1	ENSG00000176884	protein_coding	2.62664	1.59154e-10	1.13425e-09
GOLGA2P11	ENSG00000260062	transcribed_unprocessed_pseudogene	2.6279	7.43109e-07	3.19005e-06
AC093063.1	ENSG00000268088	transcribed_unprocessed_pseudogene	2.63071	9.30036e-05	0.00028753
NLRP4	ENSG00000160505	protein_coding	2.63116	4.73006e-05	0.000153449
ZCCHC12	ENSG00000174460	protein_coding	2.63123	1.13075e-10	8.20629e-10
FGF19	ENSG00000162344	protein_coding	2.63202	4.99464e-08	2.552e-07
AC090164.2	ENSG00000274139	lncRNA	2.63265	2.11317e-16	3.03124e-15
CENPK	ENSG00000123219	protein_coding	2.63305	6.36639e-46	1.07048e-43
AC011503.3	ENSG00000269421	unprocessed_pseudogene	2.63421	6.4645e-12	5.50529e-11
STRIP2	ENSG00000128578	protein_coding	2.63446	2.29761e-30	1.31174e-28
ANKS1B	ENSG00000185046	protein_coding	2.63459	8.07872e-18	1.34978e-16
RASD2	ENSG00000100302	protein_coding	2.63619	6.7459e-49	1.32133e-46
PXDNL	ENSG00000147485	protein_coding	2.63709	2.60485e-31	1.64812e-29
AC092685.1	ENSG00000232906	processed_pseudogene	2.63735	4.27503e-07	1.9077e-06
CNR1	ENSG00000118432	protein_coding	2.63766	3.72343e-13	3.68283e-12
RNF126P1	ENSG00000261192	transcribed_processed_pseudogene	2.63816	5.94747e-15	7.29721e-14
NT5DC2	ENSG00000168268	protein_coding	2.63853	1.15211e-37	1.15331e-35
TUBB3	ENSG00000258947	protein_coding	2.63866	1.97673e-14	2.28113e-13
AL136360.1	ENSG00000249006	processed_pseudogene	2.64009	1.26753e-05	4.51232e-05
CLCNKA	ENSG00000186510	protein_coding	2.64103	8.35877e-17	1.26201e-15
SLC26A6	ENSG00000225697	protein_coding	2.64168	2.16892e-81	2.66228e-78
AL450322.2	ENSG00000229672	lncRNA	2.64183	1.62195e-07	7.69871e-07
AL592466.1	ENSG00000235356	lncRNA	2.64275	0.00262278	0.00615676
SYN3	ENSG00000185666	protein_coding	2.64292	2.92415e-21	7.02871e-20
ATP4A	ENSG00000105675	protein_coding	2.6432	7.65482e-06	2.82587e-05
LINC01967	ENSG00000235493	lncRNA	2.64381	0.000161942	0.000480335
S100A3	ENSG00000188015	protein_coding	2.64387	5.37876e-21	1.26885e-19
OR5H8	ENSG00000232535	polymorphic_pseudogene	2.64517	0.000230191	0.000662282
LINC00595	ENSG00000230417	lncRNA	2.64598	2.34972e-07	1.08906e-06
LINC01711	ENSG00000268941	lncRNA	2.64849	7.31639e-07	3.14484e-06
GRIA2	ENSG00000120251	protein_coding	2.64954	7.76118e-06	2.86256e-05
PVALEF	ENSG00000225180	protein_coding	2.65078	0.000164424	0.000486873
LINC00635	ENSG00000241469	lncRNA	2.65203	1.25985e-05	4.48804e-05
NANOS1	ENSG00000188613	protein_coding	2.65217	5.92482e-26	2.21498e-24
SSTR3	ENSG00000278195	protein_coding	2.65222	6.58356e-09	3.78742e-08
AC113554.1	ENSG00000264813	protein_coding	2.65314	3.51417e-05	0.000116362
AC099850.3	ENSG00000265415	lncRNA	2.6544	2.75379e-27	1.1764e-25
AL133215.2	ENSG00000273162	lncRNA	2.6549	3.4495e-18	6.00872e-17
RN7SL751P	ENSG00000240964	misc_RNA	2.65494	5.10099e-10	3.41898e-09
AC020928.1	ENSG00000267260	lncRNA	2.65499	6.28727e-12	5.36926e-11
LINC02840	ENSG00000224893	lncRNA	2.65524	0.00325484	0.00749711
RASGRF2-AS1	ENSG00000251450	lncRNA	2.65827	1.25118e-13	1.31263e-12
USH1C	ENSG00000006611	protein_coding	2.65857	2.32079e-09	1.42245e-08
MYMX	ENSG00000262179	protein_coding	2.65858	7.98284e-16	1.07836e-14
EPHX4	ENSG00000172031	protein_coding	2.65886	9.29551e-22	2.35095e-20
CRLF2	ENSG00000205755	protein_coding	2.66075	5.5267e-10	3.68353e-09
AC018553.1	ENSG00000277559	lncRNA	2.6611	1.60855e-14	1.87803e-13
ERFE	ENSG00000178752	protein_coding	2.66182	2.15707e-34	1.69726e-32
ATP5PBP3	ENSG00000214003	processed_pseudogene	2.66237	4.35286e-05	0.00014205
LINC02477	ENSG00000249425	lncRNA	2.66348	3.26614e-05	0.000108726
BCRP2	ENSG00000169668	transcribed_unprocessed_pseudogene	2.66408	3.95895e-06	1.52942e-05
ADAM23	ENSG00000114948	protein_coding	2.66502	8.29805e-16	1.11725e-14
LINC00632	ENSG00000203930	lncRNA	2.66514	8.73124e-06	3.19316e-05
SERTAD4-AS1	ENSG00000203706	lncRNA	2.66541	2.29246e-18	4.09197e-17
AL731556.1	ENSG00000213514	processed_pseudogene	2.6662	6.15485e-12	5.26839e-11
AL358394.1	ENSG00000227683	lncRNA	2.66712	0.00284663	0.00663572
MXD3	ENSG00000213347	protein_coding	2.66798	2.86926e-79	3.10758e-76
RHBG	ENSG00000132677	protein_coding	2.66825	3.12216e-11	2.4415e-10
NELL1	ENSG00000165973	protein_coding	2.67009	0.000709157	0.00186342
MNS1	ENSG00000138587	protein_coding	2.6705	1.89996e-21	4.66427e-20
MYH2	ENSG00000125414	protein_coding	2.67148	4.98362e-05	0.000161192
TMEM132A	ENSG00000006118	protein_coding	2.67312	2.9485e-27	1.25812e-25
LINC02595	ENSG00000231566	lncRNA	2.67332	8.50731e-11	6.27676e-10
FAM155B	ENSG00000130054	protein_coding	2.67385	9.86983e-17	1.47803e-15
ZNF720P1	ENSG00000260010	processed_pseudogene	2.67404	0.00274905	0.00643022
PRRX2	ENSG00000167157	protein_coding	2.67658	2.43602e-11	1.92995e-10
AC005165.1	ENSG00000223561	lncRNA	2.67674	1.248e-09	7.94678e-09
AURKA	ENSG00000087586	protein_coding	2.67786	7.26964e-64	2.90975e-61
DLX4	ENSG00000108813	protein_coding	2.67838	1.27049e-12	1.18652e-11
H3C12	ENSG00000197153	protein_coding	2.67994	8.14418e-13	7.77349e-12
EVPL	ENSG00000167880	protein_coding	2.6824	9.03277e-12	7.57856e-11
AC092506.1	ENSG00000215869	transcribed_processed_pseudogene	2.68327	1.42035e-10	1.01876e-09
CT47B1	ENSG00000236446	protein_coding	2.6838	0.00128482	0.00320845
AC073352.1	ENSG00000272662	lncRNA	2.68421	2.23223e-16	3.19222e-15
CRABP1	ENSG00000166426	protein_coding	2.68495	0.000168821	0.000499011
AC012501.3	ENSG00000242575	transcribed_processed_pseudogene	2.685	0.00323037	0.00744587
ROS1	ENSG00000047936	protein_coding	2.68564	1.0982e-10	7.9874e-10
H1-12P	ENSG00000216331	unprocessed_pseudogene	2.68621	1.80609e-13	1.86976e-12
APLP1	ENSG00000105290	protein_coding	2.6881	2.0329e-18	3.64103e-17
RECQL4	ENSG00000160957	protein_coding	2.68916	8.96775e-52	2.14434e-49
NR5A1	ENSG00000136931	protein_coding	2.68946	1.08433e-09	6.97334e-09
KCP	ENSG00000135253	protein_coding	2.6906	2.62884e-25	9.14974e-24
LRRC52	ENSG00000162763	protein_coding	2.69276	4.08718e-06	1.57615e-05
CBX2	ENSG00000173894	protein_coding	2.6934	5.78976e-40	6.78988e-38
AL139288.1	ENSG00000231563	lncRNA	2.69605	5.19114e-11	3.93492e-10
LINC01929	ENSG00000267013	lncRNA	2.69731	4.66612e-11	3.55893e-10
MMP13	ENSG00000137745	protein_coding	2.69819	5.01457e-05	0.000162079
LINC00519	ENSG00000258955	lncRNA	2.6982	5.35309e-09	3.11902e-08
DNAH12	ENSG00000174844	protein_coding	2.69834	4.11602e-18	7.11254e-17
RNFT2	ENSG00000135119	protein_coding	2.69967	3.82304e-36	3.44204e-34
ANKRD7	ENSG00000106013	protein_coding	2.70222	8.00221e-07	3.41888e-06
KLHL34	ENSG00000185915	protein_coding	2.70282	9.43347e-10	6.12228e-09
MUC5B	ENSG00000117983	protein_coding	2.70289	2.00985e-07	9.39581e-07
DYDC1	ENSG00000170788	protein_coding	2.70316	3.73231e-09	2.22069e-08
AC020934.1	ENSG00000267424	lncRNA	2.70378	8.49498e-08	4.20286e-07
AC125603.2	ENSG00000257883	lncRNA	2.7038	2.01703e-11	1.61608e-10
AC098859.1	ENSG00000248795	processed_pseudogene	2.70445	1.89985e-11	1.52685e-10
AC034229.4	ENSG00000272417	lncRNA	2.70533	4.33526e-17	6.72175e-16
PTGES	ENSG00000148344	protein_coding	2.70724	5.65253e-15	6.95685e-14
SEPTIN14P12	ENSG00000235748	processed_pseudogene	2.70743	1.0518e-11	8.71544e-11
ZNF679	ENSG00000197123	protein_coding	2.70842	0.00329031	0.00757501
PARPBP	ENSG00000185480	protein_coding	2.70916	4.88185e-57	1.46154e-54
CLDN19	ENSG00000164007	protein_coding	2.7093	5.78132e-12	4.95903e-11
OR13A1	ENSG00000256574	protein_coding	2.70949	4.87971e-07	2.15689e-06
AL356364.1	ENSG00000238232	lncRNA	2.70989	0.000720832	0.001891
CPNE7	ENSG00000178773	protein_coding	2.71052	5.96698e-19	1.13672e-17
IQCD	ENSG00000166578	protein_coding	2.71121	1.0319e-30	6.08952e-29
AC119751.3	ENSG00000248583	unprocessed_pseudogene	2.71332	3.52618e-07	1.59577e-06
TSPEAR-AS2	ENSG00000182912	lncRNA	2.71389	3.39866e-20	7.32313e-19
SIX3	ENSG00000138083	protein_coding	2.71476	0.000120986	0.000367106
DNAJB1P1	ENSG00000213946	processed_pseudogene	2.71514	8.89556e-08	4.39161e-07
H2AW	ENSG00000181218	protein_coding	2.7173	1.20289e-15	1.58935e-14
AC010735.1	ENSG00000261379	lncRNA	2.71968	2.03764e-11	1.63082e-10
AC040174.1	ENSG00000261502	lncRNA	2.72109	0.000408099	0.00112106
KCNG3	ENSG00000171126	protein_coding	2.72119	7.17513e-06	2.65999e-05
ST6GALNAC5	ENSG00000117069	protein_coding	2.72278	3.57213e-12	3.14614e-11
RPL12P25	ENSG00000235330	transcribed_processed_pseudogene	2.72425	3.92146e-10	2.66625e-09
GINS1	ENSG00000101003	protein_coding	2.7256	1.8063e-50	3.88977e-48
ACTBP12	ENSG00000233125	processed_pseudogene	2.72721	3.68607e-06	1.43121e-05
AL132655.2	ENSG00000268649	lncRNA	2.72791	2.83716e-08	1.49958e-07
HASPIN	ENSG00000177602	protein_coding	2.72823	3.0405e-39	3.41351e-37
AC114811.2	ENSG00000260641	lncRNA	2.7287	7.11717e-10	4.68089e-09
AL137060.3	ENSG00000274270	lncRNA	2.73134	8.48526e-27	3.45261e-25
CSAG3	ENSG00000268916	protein_coding	2.73325	5.44582e-06	2.05763e-05
AP002800.1	ENSG00000280032	TEC	2.73481	7.26916e-13	6.98537e-12
SPARCL1	ENSG00000152583	protein_coding	2.73555	5.60554e-24	1.70594e-22
IL21-AS1	ENSG00000227145	lncRNA	2.73655	2.13935e-06	8.62015e-06
AC099489.2	ENSG00000262636	processed_pseudogene	2.73658	8.33337e-11	6.15707e-10
NPTX1	ENSG00000171246	protein_coding	2.73789	1.29433e-10	9.33276e-10
AC079160.1	ENSG00000250546	lncRNA	2.73815	0.00101323	0.00258549
CYP2W1	ENSG00000073067	protein_coding	2.74014	1.65012e-17	2.6686e-16
FMO9P	ENSG00000215834	transcribed_unprocessed_pseudogene	2.74049	0.000350423	0.000975874
TMEM178B	ENSG00000261115	protein_coding	2.74157	5.1301e-17	7.9009e-16
CEACAMP10	ENSG00000241104	transcribed_processed_pseudogene	2.7432	2.05291e-06	8.29634e-06
PIF1	ENSG00000140451	protein_coding	2.74415	1.60737e-45	2.65425e-43
PMFBP1	ENSG00000118557	protein_coding	2.74482	2.49083e-32	1.69229e-30
SH2D4B	ENSG00000178217	protein_coding	2.74641	4.10082e-13	4.04307e-12
LOXHD1	ENSG00000167210	protein_coding	2.74683	1.91196e-17	3.06868e-16
ASPHD1	ENSG00000174939	protein_coding	2.74812	1.27834e-16	1.88748e-15
COLCA2	ENSG00000214290	protein_coding	2.74847	7.49081e-32	4.93456e-30
ARF4P2	ENSG00000236527	processed_pseudogene	2.74861	4.29256e-10	2.90301e-09
SLC30A8	ENSG00000164756	protein_coding	2.75118	3.58803e-06	1.39609e-05
LINC02188	ENSG00000261175	lncRNA	2.75121	2.92328e-10	2.02154e-09
CHRNA3	ENSG00000080644	protein_coding	2.75148	1.80048e-09	1.12252e-08
SAPCD2	ENSG00000186193	protein_coding	2.75218	1.92314e-31	1.2231e-29
AP000525.1	ENSG00000272872	lncRNA	2.75323	2.44712e-14	2.7847e-13
OVAAL	ENSG00000236719	lncRNA	2.7544	4.40425e-06	1.69151e-05
BPESC1	ENSG00000232416	lncRNA	2.75482	3.24192e-08	1.69671e-07
SNORD104	ENSG00000199753	snoRNA	2.75645	2.9513e-38	3.09625e-36
AC104134.1	ENSG00000225420	lncRNA	2.75709	3.30503e-07	1.50215e-06
AL355596.1	ENSG00000259828	lncRNA	2.7586	6.40016e-06	2.39366e-05
TESC	ENSG00000088992	protein_coding	2.76516	4.5971e-19	8.8723e-18
AIRE	ENSG00000160224	protein_coding	2.76591	1.10002e-09	7.05946e-09
LINC01694	ENSG00000233922	lncRNA	2.76594	5.96516e-12	5.10958e-11
MAPT-IT1	ENSG00000279685	lncRNA	2.76683	2.69785e-11	2.12367e-10
CACNA1I	ENSG00000100346	protein_coding	2.76792	2.21327e-12	1.99612e-11
RFX8	ENSG00000196460	protein_coding	2.76837	6.22651e-35	5.09522e-33
ZNF280A	ENSG00000169548	protein_coding	2.76883	0.000112952	0.000344402
GAP43	ENSG00000172020	protein_coding	2.76955	5.589e-13	5.42889e-12
CFAP20DC-AS1	ENSG00000242428	lncRNA	2.76984	1.87628e-10	1.32666e-09
RGS9BP	ENSG00000186326	protein_coding	2.77091	9.45395e-15	1.13361e-13
LINC00160	ENSG00000230978	lncRNA	2.77254	2.80649e-05	9.44231e-05
TCF19	ENSG00000137310	protein_coding	2.7737	3.89639e-58	1.21594e-55
TEDC2	ENSG00000162062	protein_coding	2.77665	2.41033e-52	6.07932e-50
AC025252.2	ENSG00000257035	unprocessed_pseudogene	2.7771	0.00231762	0.00550039
ZBTB46-AS1	ENSG00000231208	lncRNA	2.77751	0.000337336	0.000942851
FGF4	ENSG00000075388	protein_coding	2.77976	0.00280311	0.0065442
GSC	ENSG00000133937	protein_coding	2.78088	4.983e-09	2.91445e-08
LUZP2	ENSG00000187398	protein_coding	2.78104	2.53575e-10	1.76716e-09
RLN3	ENSG00000171136	protein_coding	2.78135	8.07243e-05	0.00025245
NWD2	ENSG00000174145	protein_coding	2.78243	9.26612e-09	5.22056e-08
AC132807.2	ENSG00000274840	lncRNA	2.78244	5.61014e-06	2.11559e-05
AL359881.2	ENSG00000270035	lncRNA	2.78338	5.3218e-07	2.33994e-06
AL713899.1	ENSG00000206878	snoRNA	2.7835	4.2888e-07	1.91292e-06
SLC4A11	ENSG00000088836	protein_coding	2.78424	2.38195e-20	5.221e-19
MISP	ENSG00000099812	protein_coding	2.78459	1.90641e-09	1.18424e-08
BNIP3P17	ENSG00000271524	processed_pseudogene	2.78488	1.93886e-09	1.20338e-08
MIR3125	ENSG00000264370	miRNA	2.78704	3.39466e-06	1.32547e-05
SPATA3-AS1	ENSG00000238062	lncRNA	2.78853	5.8757e-14	6.38438e-13
GDF10	ENSG00000266524	protein_coding	2.78873	3.15021e-09	1.89858e-08
H1-7	ENSG00000187166	protein_coding	2.79032	3.58051e-07	1.61857e-06
AC090954.1	ENSG00000228874	processed_pseudogene	2.79188	3.0891e-06	1.21518e-05
MIR325HG	ENSG00000280870	lncRNA	2.79193	1.84798e-12	1.68191e-11
COL11A1	ENSG00000060718	protein_coding	2.79303	9.88362e-12	8.22931e-11
IGFL2-AS1	ENSG00000268621	lncRNA	2.79417	1.64901e-06	6.75002e-06
TMC5	ENSG00000103534	protein_coding	2.79424	1.01241e-13	1.07037e-12
SHOX2	ENSG00000168779	protein_coding	2.79582	3.47563e-17	5.43236e-16
LINC00664	ENSG00000268658	lncRNA	2.79627	1.86027e-13	1.92099e-12
PSMC1P10	ENSG00000236348	processed_pseudogene	2.79772	6.84424e-09	3.9337e-08
PRAMEF9	ENSG00000204505	protein_coding	2.79786	0.000454934	0.00123854
LINC00665	ENSG00000232677	lncRNA	2.80009	1.45485e-26	5.76058e-25
C1QTNF3	ENSG00000082196	protein_coding	2.80202	1.41985e-22	3.85865e-21
DLX2-DT	ENSG00000236651	lncRNA	2.80248	7.9517e-05	0.000248949
CLSPN	ENSG00000092853	protein_coding	2.80271	4.79487e-35	3.99471e-33
LINC02154	ENSG00000235385	lncRNA	2.80356	8.04882e-06	2.96123e-05
CTSLP8	ENSG00000234575	unprocessed_pseudogene	2.80399	8.37721e-05	0.000261249
MCF2L2	ENSG00000053524	protein_coding	2.80626	9.33211e-20	1.92303e-18
BX322234.2	ENSG00000233085	lncRNA	2.80698	1.07032e-06	4.4936e-06
RPLP0P2	ENSG00000243742	transcribed_processed_pseudogene	2.80899	2.23856e-22	5.97772e-21
AC068669.1	ENSG00000279199	TEC	2.80944	8.09005e-17	1.22445e-15
NFE2L1-DT	ENSG00000263412	lncRNA	2.81128	1.34405e-44	2.05366e-42
TRAIP	ENSG00000183763	protein_coding	2.8113	1.64982e-63	6.46307e-61
PRR7-AS1	ENSG00000246334	lncRNA	2.81242	1.67976e-18	3.03959e-17
LINC01117	ENSG00000224577	lncRNA	2.81688	1.38541e-10	9.95052e-10
HOXC11	ENSG00000123388	protein_coding	2.8171	0.000164622	0.00048738
ATP5MC1P4	ENSG00000227440	processed_pseudogene	2.81745	9.13454e-19	1.70746e-17
ZNF883	ENSG00000228623	transcribed_unprocessed_pseudogene	2.81751	1.51613e-20	3.3857e-19
HOXA3	ENSG00000105997	protein_coding	2.81943	9.10391e-24	2.73221e-22
PRKG1-AS1	ENSG00000236671	lncRNA	2.82177	3.39706e-07	1.54132e-06
KLHL38	ENSG00000175946	protein_coding	2.82393	1.70749e-12	1.55994e-11
AL355987.5	ENSG00000274356	unprocessed_pseudogene	2.82462	2.57969e-14	2.9265e-13
MYADML2	ENSG00000185105	protein_coding	2.82481	3.64002e-11	2.81893e-10
LINC01060	ENSG00000249378	lncRNA	2.82553	5.90072e-06	2.21677e-05
PLXDC1	ENSG00000161381	protein_coding	2.82565	3.13446e-52	7.85194e-50
AL355796.1	ENSG00000220154	processed_pseudogene	2.82633	2.17543e-08	1.1646e-07
NKX1-2	ENSG00000229544	protein_coding	2.82788	4.14377e-05	0.000135684
BNIP5	ENSG00000189325	protein_coding	2.82999	7.91428e-09	4.51418e-08
HAGHL	ENSG00000103253	protein_coding	2.83044	5.39493e-29	2.76304e-27
AC007848.1	ENSG00000255983	lncRNA	2.83074	3.72715e-05	0.000122949
DDX11-AS1	ENSG00000245614	lncRNA	2.83076	9.42366e-41	1.17625e-38
APELA	ENSG00000248329	protein_coding	2.83182	0.00019577	0.000571567
GABRE	ENSG00000102287	protein_coding	2.83277	3.04096e-33	2.20001e-31
TMC2	ENSG00000149488	protein_coding	2.83356	2.90098e-14	3.27686e-13
LINC00944	ENSG00000256128	lncRNA	2.83399	6.74282e-17	1.02645e-15
NOX4	ENSG00000086991	protein_coding	2.83417	5.6283e-54	1.49105e-51
RNF183	ENSG00000165188	protein_coding	2.83436	3.40106e-13	3.37849e-12
HRCT1	ENSG00000196196	protein_coding	2.83539	6.78532e-26	2.51371e-24
AC119751.6	ENSG00000251630	processed_pseudogene	2.83632	1.92205e-06	7.79887e-06
AP003068.4	ENSG00000278952	TEC	2.83801	2.66094e-24	8.36775e-23
SAPCD1	ENSG00000228727	protein_coding	2.83827	3.63233e-34	2.81594e-32
AC108517.1	ENSG00000249111	lncRNA	2.83884	0.00430324	0.00964998
EYA1	ENSG00000104313	protein_coding	2.83891	1.41855e-09	8.95996e-09
PLEKHG4B	ENSG00000153404	protein_coding	2.83992	2.33537e-13	2.37432e-12
AC005670.1	ENSG00000261886	lncRNA	2.84021	1.49689e-14	1.75267e-13
AC010719.1	ENSG00000270933	lncRNA	2.84158	4.52996e-47	8.17703e-45
FOXS1	ENSG00000179772	protein_coding	2.84324	1.05806e-36	9.83886e-35
TOMM40P1	ENSG00000277156	processed_pseudogene	2.84471	9.06393e-13	8.60454e-12
LINC01186	ENSG00000236751	lncRNA	2.84471	4.40937e-20	9.39645e-19
AL358075.2	ENSG00000227857	lncRNA	2.84606	6.3805e-15	7.79548e-14
CA12	ENSG00000074410	protein_coding	2.84618	3.22812e-15	4.08216e-14
LINC01426	ENSG00000234380	lncRNA	2.84636	1.34141e-23	3.96436e-22
MDGA2	ENSG00000139915	protein_coding	2.84765	1.14864e-06	4.79999e-06
ORC6	ENSG00000091651	protein_coding	2.84824	1.52267e-50	3.33756e-48
LINC00628	ENSG00000280924	lncRNA	2.84832	1.2347e-17	2.02704e-16
AC008443.2	ENSG00000248103	lncRNA	2.84999	2.80176e-06	1.10795e-05
TLX1	ENSG00000107807	protein_coding	2.85061	1.36877e-27	6.00758e-26
NDUFA4L2	ENSG00000185633	protein_coding	2.85079	5.72013e-46	9.6623e-44
RTKN2	ENSG00000182010	protein_coding	2.85133	1.1997e-31	7.80524e-30
COX4I2	ENSG00000131055	protein_coding	2.85223	1.28752e-46	2.22591e-44
ZNF676	ENSG00000196109	protein_coding	2.85424	8.62359e-12	7.25674e-11
AL121906.2	ENSG00000275223	lncRNA	2.85484	9.72931e-35	7.80549e-33
PRAMEF15	ENSG00000204501	protein_coding	2.85559	5.35313e-06	2.02552e-05
AP005212.2	ENSG00000274214	processed_pseudogene	2.85692	1.97667e-08	1.06448e-07
SOSTDC1	ENSG00000171243	protein_coding	2.85783	1.88938e-14	2.18788e-13
MYH8	ENSG00000133020	protein_coding	2.85803	3.77672e-06	1.46378e-05
PLPPR4	ENSG00000117600	protein_coding	2.85899	1.2146e-20	2.7541e-19
TCL6	ENSG00000187621	lncRNA	2.85906	3.99598e-12	3.50019e-11
AC008825.2	ENSG00000270495	processed_pseudogene	2.86082	9.63574e-06	3.49914e-05
ZNF492	ENSG00000229676	protein_coding	2.86094	6.45105e-12	5.49892e-11
GAL	ENSG00000069482	protein_coding	2.86113	1.15206e-07	5.59527e-07
FOXJ1	ENSG00000129654	protein_coding	2.86217	2.44331e-12	2.19445e-11
RETNLB	ENSG00000163515	protein_coding	2.86243	4.4248e-06	1.69817e-05
AL512652.1	ENSG00000275485	lncRNA	2.86266	6.81296e-17	1.03627e-15
TLX1NB	ENSG00000236311	lncRNA	2.86315	4.78158e-10	3.21602e-09
CR382285.1	ENSG00000270533	transcribed_processed_pseudogene	2.86461	1.62473e-08	8.85701e-08
RNF224	ENSG00000233198	protein_coding	2.8665	2.18026e-13	2.22955e-12
LINC02562	ENSG00000260265	lncRNA	2.87056	9.36698e-07	3.9638e-06
TNNC1	ENSG00000114854	protein_coding	2.8727	2.6758e-19	5.28047e-18
AC090578.1	ENSG00000253553	lncRNA	2.87529	0.000117129	0.000356134
TPRXL	ENSG00000180438	transcribed_processed_pseudogene	2.87661	2.19582e-10	1.54105e-09
BRDTP1	ENSG00000271209	processed_pseudogene	2.87701	1.62699e-07	7.71767e-07
CHGB	ENSG00000089199	protein_coding	2.87768	3.18569e-09	1.91871e-08
SPINK1	ENSG00000164266	protein_coding	2.8803	9.79351e-13	9.25183e-12
AL033527.2	ENSG00000261798	lncRNA	2.88099	1.55639e-11	1.26406e-10
INSRR	ENSG00000027644	protein_coding	2.88109	9.49457e-12	7.93347e-11
AC025176.1	ENSG00000250081	lncRNA	2.88262	6.68719e-14	7.21715e-13
DLL3	ENSG00000090932	protein_coding	2.8828	2.08278e-08	1.11867e-07
AL596223.2	ENSG00000231748	lncRNA	2.88293	2.86671e-11	2.24843e-10
SMKR1	ENSG00000240204	protein_coding	2.88303	2.17369e-16	3.11456e-15
HES2	ENSG00000069812	protein_coding	2.88381	1.66211e-18	3.01209e-17
TCF24	ENSG00000261787	protein_coding	2.88519	7.7468e-06	2.85782e-05
GUCY2C	ENSG00000070019	protein_coding	2.88569	7.91898e-14	8.47945e-13
STEAP1B	ENSG00000105889	protein_coding	2.88573	8.22593e-18	1.3725e-16
ROBO1	ENSG00000169855	protein_coding	2.88841	1.30651e-40	1.6037e-38
CEL	ENSG00000170835	protein_coding	2.88935	2.22541e-23	6.48841e-22
GFY	ENSG00000261949	protein_coding	2.89227	4.06353e-07	1.8226e-06
ZNF730	ENSG00000183850	protein_coding	2.89312	5.4689e-11	4.13016e-10
XRCC2	ENSG00000196584	protein_coding	2.89399	3.51294e-52	8.74058e-50
LINC01579	ENSG00000258754	lncRNA	2.89786	6.3136e-06	2.36248e-05
AC108136.1	ENSG00000255325	lncRNA	2.8989	3.11716e-13	3.11327e-12
LINC01338	ENSG00000281327	lncRNA	2.90133	2.95787e-06	1.16617e-05
MYBPC1	ENSG00000196091	protein_coding	2.90146	3.02757e-21	7.263e-20
GBX2	ENSG00000168505	protein_coding	2.90361	1.44776e-10	1.0372e-09
H2AC16	ENSG00000276903	protein_coding	2.90375	3.5254e-14	3.94108e-13
SPATC1L	ENSG00000160284	protein_coding	2.90463	1.95459e-37	1.93228e-35
LINC02041	ENSG00000228952	lncRNA	2.9047	7.4061e-10	4.86136e-09
PLVAP	ENSG00000130300	protein_coding	2.90545	5.84216e-99	7.17105e-95
SULT1C2P1	ENSG00000237223	transcribed_unprocessed_pseudogene	2.90563	4.24123e-12	3.70356e-11
LINC02489	ENSG00000255007	lncRNA	2.90579	3.78291e-05	0.000124633
NEB	ENSG00000183091	protein_coding	2.90641	2.24292e-23	6.53428e-22
PRAMEF7	ENSG00000204510	protein_coding	2.90676	1.3108e-06	5.43448e-06
AC089983.1	ENSG00000257732	lncRNA	2.90988	9.80173e-09	5.50464e-08
AC008750.2	ENSG00000267905	lncRNA	2.91422	7.77152e-13	7.43707e-12
AC002351.1	ENSG00000258240	lncRNA	2.91433	3.27985e-06	1.28418e-05
PCDHB2	ENSG00000112852	protein_coding	2.91458	3.20428e-19	6.26631e-18
ORC1	ENSG00000085840	protein_coding	2.9169	1.19734e-53	3.127e-51
FP325330.3	ENSG00000279712	lncRNA	2.91745	1.01752e-07	4.97861e-07
GRM4	ENSG00000124493	protein_coding	2.91763	4.07801e-10	2.76554e-09
SLC6A8	ENSG00000130821	protein_coding	2.91801	1.98688e-25	7.00141e-24
SOHLH1	ENSG00000165643	protein_coding	2.91924	1.89128e-06	7.67854e-06
TPBGL	ENSG00000261594	protein_coding	2.9195	8.18573e-22	2.08315e-20
AL162726.3	ENSG00000228430	transcribed_unprocessed_pseudogene	2.92004	2.0694e-14	2.38137e-13
PAGE5	ENSG00000158639	protein_coding	2.92015	2.07976e-11	1.66201e-10
LINC00645	ENSG00000258548	lncRNA	2.92018	3.12232e-05	0.000104268
MYCNOS	ENSG00000233718	lncRNA	2.92332	2.82784e-10	1.95848e-09
LRRC37A6P	ENSG00000230445	transcribed_processed_pseudogene	2.92489	1.08019e-26	4.34246e-25
LINC02212	ENSG00000249396	lncRNA	2.92535	0.000731605	0.00191707
PKIA-AS1	ENSG00000254266	lncRNA	2.92553	1.20636e-06	5.0292e-06
CEACAM7	ENSG00000007306	protein_coding	2.9263	0.000584087	0.00155757
FLJ12825	ENSG00000248265	lncRNA	2.92684	6.44089e-15	7.85622e-14
MND1	ENSG00000121211	protein_coding	2.92696	6.89125e-59	2.20664e-56
SAMMSON	ENSG00000240405	lncRNA	2.92794	1.15174e-06	4.81149e-06
MIR148A	ENSG00000199085	miRNA	2.92886	2.48398e-16	3.53849e-15
LINC01508	ENSG00000231107	lncRNA	2.92919	0.000127542	0.000385377
NKX2-5	ENSG00000183072	protein_coding	2.93109	2.02097e-05	6.9623e-05
MLXP1	ENSG00000226539	processed_pseudogene	2.93121	4.31147e-07	1.92164e-06
ARHGEF39	ENSG00000137135	protein_coding	2.93143	2.30215e-82	3.39097e-79
STRC	ENSG00000242866	protein_coding	2.93301	1.39996e-14	1.64545e-13
SLC6A7	ENSG00000011083	protein_coding	2.93323	2.17826e-12	1.96743e-11
LINC00494	ENSG00000235621	lncRNA	2.93413	1.08346e-09	6.96899e-09
RPRML	ENSG00000179673	protein_coding	2.93477	7.27984e-11	5.41561e-10
ZNF729	ENSG00000196350	protein_coding	2.93502	0.000172833	0.000509967
EDIL3-DT	ENSG00000250320	lncRNA	2.93554	3.46939e-12	3.06004e-11
NPPB	ENSG00000120937	protein_coding	2.93588	2.19706e-07	1.02204e-06
ZNF725P	ENSG00000268100	unprocessed_pseudogene	2.93957	0.00243019	0.00574476
AC105411.1	ENSG00000259867	lncRNA	2.94119	1.58868e-16	2.31232e-15
KASH5	ENSG00000161609	protein_coding	2.94127	3.52537e-11	2.73763e-10
MAFG-DT	ENSG00000265688	lncRNA	2.94313	1.02842e-40	1.27511e-38
AC012625.1	ENSG00000251361	lncRNA	2.94473	4.57721e-07	2.03172e-06
FER1L6-AS2	ENSG00000253868	lncRNA	2.94552	8.16957e-05	0.000255314
NAP1L4P1	ENSG00000177173	processed_pseudogene	2.94668	8.30046e-24	2.49923e-22
AKAP14	ENSG00000186471	protein_coding	2.94865	8.24792e-10	5.38513e-09
ARFGEF3	ENSG00000112379	protein_coding	2.94979	1.02904e-22	2.83844e-21
NTM	ENSG00000182667	protein_coding	2.95001	1.05116e-18	1.951e-17
MED15P9	ENSG00000223760	transcribed_unprocessed_pseudogene	2.95151	0.000462659	0.00125715
LDC1P	ENSG00000260386	transcribed_unitary_pseudogene	2.9527	6.81369e-15	8.2972e-14
CPA1	ENSG00000091704	protein_coding	2.95649	3.88627e-07	1.74671e-06
NPHS1	ENSG00000161270	protein_coding	2.95728	2.24573e-09	1.37989e-08
AC136621.1	ENSG00000278928	TEC	2.95746	2.02612e-05	6.9794e-05
THAP12P3	ENSG00000227972	processed_pseudogene	2.95748	2.05742e-08	1.10602e-07
LINC01108	ENSG00000226673	lncRNA	2.95829	2.88126e-16	4.07918e-15
RIBC2	ENSG00000128408	protein_coding	2.95837	1.14265e-28	5.57309e-27
AC022098.2	ENSG00000267670	lncRNA	2.95896	2.62408e-06	1.04194e-05
FER1L4	ENSG00000088340	transcribed_unitary_pseudogene	2.96045	4.82845e-23	1.36982e-21
AL603650.1	ENSG00000232355	unprocessed_pseudogene	2.96073	2.38672e-05	8.12129e-05
PTP4A2P2	ENSG00000254481	processed_pseudogene	2.96131	3.94702e-25	1.34579e-23
TRAM1L1	ENSG00000174599	protein_coding	2.96256	9.44766e-20	1.94467e-18
TRIM16	ENSG00000221926	protein_coding	2.9644	3.45018e-33	2.49117e-31
SLC6A3	ENSG00000142319	protein_coding	2.96473	1.2963e-08	7.15881e-08
NCAPH	ENSG00000121152	protein_coding	2.9654	5.13169e-60	1.73366e-57
CRYBA2	ENSG00000163499	protein_coding	2.96553	1.04463e-07	5.10315e-07
H3C8	ENSG00000273983	protein_coding	2.96596	2.71401e-10	1.88318e-09
LINC02050	ENSG00000242781	lncRNA	2.96618	1.07707e-05	3.87856e-05
MNX1-AS2	ENSG00000235029	lncRNA	2.96639	2.17114e-05	7.43167e-05
IGDCC4	ENSG00000103742	protein_coding	2.96764	3.53073e-19	6.8755e-18
MPZ	ENSG00000158887	protein_coding	2.97	1.15555e-22	3.1708e-21
PDZK1IP1	ENSG00000162366	protein_coding	2.97252	2.35525e-16	3.36162e-15
SFRP4	ENSG00000106483	protein_coding	2.97305	5.06592e-25	1.70208e-23
AC011447.7	ENSG00000280079	TEC	2.97467	7.00278e-23	1.96548e-21
RXFP4	ENSG00000173080	protein_coding	2.97468	1.92967e-08	1.04084e-07
EGFEM1P	ENSG00000206120	transcribed_unitary_pseudogene	2.97509	5.17883e-10	3.468e-09
ASF1B	ENSG00000105011	protein_coding	2.9753	4.82212e-57	1.45549e-54
OLFML2B	ENSG00000162745	protein_coding	2.97543	3.46931e-60	1.20522e-57
ALOX15B	ENSG00000179593	protein_coding	2.97599	1.04818e-16	1.56649e-15
RGSL1	ENSG00000121446	protein_coding	2.9799	2.32811e-10	1.62954e-09
AC079597.1	ENSG00000280049	TEC	2.9809	0.00145769	0.00360013
MAPT	ENSG00000186868	protein_coding	2.98163	4.63306e-45	7.45013e-43
LINC02505	ENSG00000248215	lncRNA	2.98174	0.000722446	0.00189483
ETV4	ENSG00000175832	protein_coding	2.98443	8.78472e-25	2.88829e-23
ELFN1-AS1	ENSG00000236081	lncRNA	2.98662	5.05792e-11	3.84106e-10
BAIAP2L2	ENSG00000128298	protein_coding	2.98732	1.22112e-31	7.9066e-30
AC005324.3	ENSG00000251537	protein_coding	2.98766	3.45465e-11	2.68668e-10
FUT2	ENSG00000176920	protein_coding	2.98828	3.58842e-25	1.22693e-23
AP000997.3	ENSG00000260254	lncRNA	2.98859	1.60557e-10	1.14292e-09
LEF1	ENSG00000138795	protein_coding	2.98955	1.09739e-32	7.5959e-31
LINC02875	ENSG00000187013	lncRNA	2.99064	3.59306e-39	3.98527e-37
POLQ	ENSG00000051341	protein_coding	2.99153	1.68834e-50	3.65714e-48
CASC8	ENSG00000246228	lncRNA	2.99225	1.08406e-10	7.89702e-10
E2F2	ENSG00000007968	protein_coding	2.9932	4.78079e-51	1.08672e-48
AL133325.3	ENSG00000278041	lncRNA	2.99385	6.88499e-09	3.95574e-08
RFX6	ENSG00000185002	protein_coding	2.99416	1.9344e-08	1.04324e-07
UBL4B	ENSG00000186150	protein_coding	2.99583	6.62773e-08	3.33597e-07
GAPLINC	ENSG00000266835	lncRNA	2.99636	1.88535e-20	4.1823e-19
LINC01549	ENSG00000232560	lncRNA	2.99714	2.79146e-15	3.55807e-14
SP6	ENSG00000189120	protein_coding	2.99778	7.77798e-34	5.82147e-32
METTL11B	ENSG00000203740	protein_coding	2.99841	2.3383e-06	9.35727e-06
SPATA31C2	ENSG00000177910	transcribed_unprocessed_pseudogene	2.99856	3.4039e-05	0.000112978
LINC00332	ENSG00000230710	lncRNA	2.99921	8.79806e-07	3.73772e-06
AC005537.1	ENSG00000232006	lncRNA	3.00087	1.67544e-07	7.93627e-07
GPR35	ENSG00000178623	protein_coding	3.00108	5.73216e-23	1.615e-21
C10orf88B	ENSG00000255624	transcribed_processed_pseudogene	3.00327	1.09797e-16	1.63426e-15
HTR3B	ENSG00000149305	protein_coding	3.00451	3.3443e-06	1.30789e-05
BFSP2	ENSG00000170819	protein_coding	3.00712	1.39596e-16	2.04719e-15
GCNT3	ENSG00000140297	protein_coding	3.00794	1.78078e-19	3.59121e-18
AC239585.2	ENSG00000279750	lncRNA	3.01095	1.55411e-06	6.38569e-06
C1orf158	ENSG00000157330	protein_coding	3.01153	1.81769e-06	7.39692e-06
MTFR2	ENSG00000146410	protein_coding	3.0121	3.00002e-51	6.94798e-49
AC013451.2	ENSG00000258976	lncRNA	3.01317	4.39895e-11	3.36561e-10
HRAT92	ENSG00000223855	lncRNA	3.01394	2.37231e-26	9.25403e-25
DAND5	ENSG00000179284	protein_coding	3.01558	4.3455e-18	7.481e-17
LINC02228	ENSG00000251273	lncRNA	3.01565	8.25133e-06	3.02697e-05
MYO1A	ENSG00000166866	protein_coding	3.01599	4.27022e-27	1.79505e-25
LINC01842	ENSG00000267147	lncRNA	3.01715	1.66745e-11	1.34692e-10
OR51E2	ENSG00000167332	protein_coding	3.0174	3.05074e-14	3.43233e-13
LINC01164	ENSG00000189275	lncRNA	3.02142	1.06031e-05	3.82268e-05
AC083809.1	ENSG00000277247	lncRNA	3.02157	5.40306e-09	3.14565e-08
AL354798.1	ENSG00000273628	unprocessed_pseudogene	3.02219	7.73956e-16	1.04742e-14
CCL26	ENSG00000006606	protein_coding	3.02297	1.66316e-15	2.16564e-14
SMIM12P1	ENSG00000271284	processed_pseudogene	3.02403	7.71547e-08	3.84406e-07
AC021491.2	ENSG00000250286	lncRNA	3.02791	4.83529e-16	6.66372e-15
KLF2P4	ENSG00000236516	processed_pseudogene	3.02848	0.000340284	0.000950154
AC024581.1	ENSG00000249894	lncRNA	3.02903	5.72043e-11	4.31216e-10
PRAC2	ENSG00000229637	protein_coding	3.02923	0.000170172	0.000502762
LRRC77P	ENSG00000244227	transcribed_unitary_pseudogene	3.03024	1.30309e-20	2.93845e-19
FAM3B	ENSG00000183844	protein_coding	3.03093	2.67111e-15	3.41294e-14
SULT1C3	ENSG00000196228	protein_coding	3.03445	8.13147e-05	0.000254231
MCM10	ENSG00000065328	protein_coding	3.03473	1.80002e-47	3.34768e-45
MIR483	ENSG00000207805	miRNA	3.0357	0.00047479	0.00128708
XKR3	ENSG00000172967	protein_coding	3.03616	8.90703e-07	3.78177e-06
AC023347.1	ENSG00000235774	lncRNA	3.04014	1.70289e-05	5.9393e-05
ANO2	ENSG00000047617	protein_coding	3.04274	2.10049e-23	6.14363e-22
LINC00114	ENSG00000223806	lncRNA	3.04323	9.59526e-11	7.04137e-10
AC024563.1	ENSG00000268981	lncRNA	3.04367	7.72498e-06	2.85035e-05
AC025575.2	ENSG00000258053	lncRNA	3.04538	2.95693e-10	2.04366e-09
PSCA	ENSG00000167653	protein_coding	3.04655	8.56392e-16	1.15136e-14
AC091133.3	ENSG00000250838	lncRNA	3.04711	0.000364918	0.00101203
AC113404.1	ENSG00000250348	lncRNA	3.04792	1.76458e-15	2.29283e-14
PARAL1	ENSG00000243961	lncRNA	3.04803	1.87372e-09	1.16491e-08
SGO1	ENSG00000129810	protein_coding	3.04832	5.24923e-57	1.55885e-54
AC100872.2	ENSG00000263443	lncRNA	3.0494	7.09589e-13	6.82778e-12
CACNB4	ENSG00000182389	protein_coding	3.05009	4.1251e-23	1.17937e-21
CEP55	ENSG00000138180	protein_coding	3.0509	4.11331e-48	7.80765e-46
LINC02046	ENSG00000242440	lncRNA	3.05217	0.000461935	0.00125556
LINC01257	ENSG00000204603	lncRNA	3.05289	5.1984e-05	0.000167624
PPY2P	ENSG00000265060	transcribed_unprocessed_pseudogene	3.05298	0.00141145	0.0034993
AL355601.1	ENSG00000234692	lncRNA	3.05396	1.08356e-06	4.5466e-06
OR51E1	ENSG00000180785	protein_coding	3.05715	2.8165e-44	4.2681e-42
USH1G	ENSG00000182040	protein_coding	3.05853	4.66573e-08	2.38792e-07
BNIP3P9	ENSG00000270325	processed_pseudogene	3.05856	5.82786e-08	2.95274e-07
AC124067.4	ENSG00000254290	lncRNA	3.06338	3.10774e-14	3.49485e-13
LINC02587	ENSG00000229108	lncRNA	3.06632	1.15655e-08	6.43044e-08
ACTBP8	ENSG00000220267	processed_pseudogene	3.06739	3.54544e-11	2.75205e-10
TNNT1	ENSG00000105048	protein_coding	3.06748	2.16924e-14	2.48692e-13
LINC01511	ENSG00000250584	lncRNA	3.06827	1.63992e-05	5.73979e-05
AL139275.2	ENSG00000227131	lncRNA	3.06978	3.18948e-05	0.000106376
SRRM3	ENSG00000177679	protein_coding	3.07108	1.18007e-21	2.96217e-20
CST2	ENSG00000170369	protein_coding	3.07262	6.0989e-14	6.60742e-13
LINC01977	ENSG00000262772	lncRNA	3.07351	1.28405e-15	1.69355e-14
RRM2	ENSG00000171848	protein_coding	3.07486	3.8368e-66	1.85903e-63
CAMKV	ENSG00000164076	protein_coding	3.07498	6.03469e-08	3.05207e-07
WDR82P1	ENSG00000234629	processed_pseudogene	3.0752	4.46356e-05	0.000145302
CDC45	ENSG00000093009	protein_coding	3.07635	2.90535e-60	1.01892e-57
LINC00898	ENSG00000205634	lncRNA	3.08343	1.96739e-06	7.97085e-06
REEP2	ENSG00000132563	protein_coding	3.08639	5.72336e-27	2.37607e-25
AP005262.1	ENSG00000266602	lncRNA	3.08675	5.92011e-12	5.07336e-11
AC109439.1	ENSG00000250284	lncRNA	3.08774	1.59646e-05	5.59941e-05
H1-5	ENSG00000184357	protein_coding	3.09043	2.9464e-15	3.74003e-14
MROH3P	ENSG00000233217	transcribed_unitary_pseudogene	3.09336	2.78571e-09	1.68885e-08
CENPI	ENSG00000102384	protein_coding	3.0935	8.03024e-58	2.46421e-55
AL110292.1	ENSG00000258081	lncRNA	3.0955	4.27111e-07	1.90619e-06
HOXD8	ENSG00000175879	protein_coding	3.09565	3.3645e-35	2.84161e-33
AL023803.2	ENSG00000274825	lncRNA	3.09729	7.03125e-31	4.23762e-29
AP1M2	ENSG00000129354	protein_coding	3.09795	2.09417e-15	2.70202e-14
AL591501.1	ENSG00000233928	lncRNA	3.09861	0.000252919	0.000722144
KIF14	ENSG00000118193	protein_coding	3.09924	9.51869e-59	2.99587e-56
AL713998.1	ENSG00000227706	lncRNA	3.10084	0.00431524	0.00967456
TEDDM2P	ENSG00000233537	unitary_pseudogene	3.10122	9.45998e-05	0.00029217
AC119751.4	ENSG00000250753	processed_pseudogene	3.10281	2.07753e-09	1.28447e-08
AC104041.1	ENSG00000259692	lncRNA	3.10363	2.45172e-07	1.13334e-06
LINC01116	ENSG00000163364	lncRNA	3.10423	1.19361e-23	3.5475e-22
TRPC7-AS1	ENSG00000248211	lncRNA	3.10536	1.36321e-08	7.49794e-08
LINC02820	ENSG00000258815	lncRNA	3.10739	7.20899e-07	3.1023e-06
AC092447.5	ENSG00000233288	lncRNA	3.10755	2.4212e-06	9.66487e-06
CXCL17	ENSG00000189377	protein_coding	3.11026	1.88703e-17	3.03045e-16
AP001331.1	ENSG00000230948	processed_pseudogene	3.11178	8.32038e-08	4.12147e-07
SNCG	ENSG00000173267	protein_coding	3.11223	5.36293e-26	2.0131e-24
LINC01249	ENSG00000231532	lncRNA	3.11458	0.000750856	0.00196263
AC138761.1	ENSG00000264956	lncRNA	3.11603	4.37051e-05	0.000142589
CDH17	ENSG00000079112	protein_coding	3.11651	1.01176e-11	8.40831e-11
LINC00501	ENSG00000203645	lncRNA	3.11698	5.67956e-10	3.78062e-09
HIGD1B	ENSG00000131097	protein_coding	3.1171	7.07983e-69	4.01089e-66
RN7SKP106	ENSG00000222764	misc_RNA	3.11836	3.61201e-05	0.000119398
CSMD2	ENSG00000121904	protein_coding	3.11934	4.54354e-28	2.07325e-26
SEPTIN3	ENSG00000100167	protein_coding	3.12161	9.13893e-30	4.97828e-28
AC007608.4	ENSG00000278909	TEC	3.12304	3.64356e-08	1.89186e-07
AP000553.2	ENSG00000272954	lncRNA	3.12524	1.78459e-17	2.8747e-16
HTR2C	ENSG00000147246	protein_coding	3.12539	6.47978e-05	0.000205611
LNCAROD	ENSG00000231131	lncRNA	3.12684	1.14531e-08	6.37081e-08
ERC2	ENSG00000187672	protein_coding	3.12876	5.13003e-13	5.00552e-12
AC018641.1	ENSG00000226468	processed_pseudogene	3.12884	5.75381e-08	2.91884e-07
SPC25	ENSG00000152253	protein_coding	3.13061	7.98052e-66	3.81655e-63
AC092490.1	ENSG00000249790	lncRNA	3.13097	3.16405e-12	2.80822e-11
YWHAEP7	ENSG00000276715	transcribed_unprocessed_pseudogene	3.13173	3.22727e-10	2.21843e-09
AC040173.1	ENSG00000263257	lncRNA	3.13243	3.83021e-09	2.27307e-08
AGR2	ENSG00000106541	protein_coding	3.13371	2.21805e-09	1.36402e-08
AL391730.1	ENSG00000228940	unprocessed_pseudogene	3.13489	2.09822e-11	1.67603e-10
DCC	ENSG00000187323	protein_coding	3.1358	5.07519e-12	4.38501e-11
AL606489.1	ENSG00000226330	lncRNA	3.13585	1.07724e-35	9.31184e-34
LINC01235	ENSG00000270547	lncRNA	3.13599	2.13821e-22	5.72637e-21
PRDM7	ENSG00000126856	protein_coding	3.13741	1.47448e-16	2.15718e-15
AL445228.3	ENSG00000271387	lncRNA	3.13761	1.77664e-17	2.86315e-16
DUXAP8	ENSG00000206195	lncRNA	3.13794	1.15094e-31	7.51458e-30
AL049830.3	ENSG00000258525	lncRNA	3.13808	1.91321e-14	2.21408e-13
MS4A10	ENSG00000172689	protein_coding	3.13921	1.5526e-06	6.38019e-06
ADAMTS18	ENSG00000140873	protein_coding	3.13924	2.57068e-15	3.29147e-14
PIMREG	ENSG00000129195	protein_coding	3.13967	2.96036e-31	1.86665e-29
OR2AT1P	ENSG00000254475	unprocessed_pseudogene	3.14233	9.68291e-06	3.51398e-05
KIF5A	ENSG00000155980	protein_coding	3.14388	1.01522e-15	1.35206e-14
AP004147.1	ENSG00000250493	lncRNA	3.14497	2.07921e-08	1.11708e-07
AP001178.3	ENSG00000266456	lncRNA	3.14663	6.73426e-18	1.13441e-16
CENPE	ENSG00000138778	protein_coding	3.14705	8.08222e-64	3.20021e-61
TTC39A	ENSG00000085831	protein_coding	3.14738	5.92657e-34	4.49071e-32
AL035045.1	ENSG00000233625	lncRNA	3.14818	1.58227e-07	7.52494e-07
AC007099.1	ENSG00000231172	lncRNA	3.14835	3.75539e-11	2.90461e-10
C9orf57	ENSG00000204669	protein_coding	3.14876	8.36885e-11	6.1808e-10
LINC01269	ENSG00000258689	lncRNA	3.15456	3.56157e-12	3.13834e-11
KCNE5	ENSG00000176076	protein_coding	3.15549	9.45627e-23	2.6241e-21
AL591848.2	ENSG00000235021	lncRNA	3.15634	3.57212e-14	3.99089e-13
LINC01632	ENSG00000277199	lncRNA	3.15746	3.56656e-05	0.000117971
RBP2	ENSG00000114113	protein_coding	3.1601	1.20151e-12	1.1261e-11
PKMYT1	ENSG00000127564	protein_coding	3.16093	3.18769e-69	1.83411e-66
C5orf58	ENSG00000234511	protein_coding	3.16127	1.9291e-16	2.77815e-15
IL17D	ENSG00000172458	protein_coding	3.16199	1.06093e-24	3.46652e-23
LINC01451	ENSG00000279141	lncRNA	3.16259	2.50289e-28	1.18011e-26
CDCA8	ENSG00000134690	protein_coding	3.16442	6.72661e-71	4.34563e-68
LINC00958	ENSG00000251381	lncRNA	3.16545	5.93322e-07	2.58654e-06
AC010931.1	ENSG00000248540	lncRNA	3.16688	2.85658e-12	2.54946e-11
LINC01436	ENSG00000231106	lncRNA	3.16734	1.18463e-13	1.2467e-12
H2BU1	ENSG00000196890	protein_coding	3.16809	2.33468e-12	2.1015e-11
AC078909.2	ENSG00000274444	lncRNA	3.17158	5.23169e-17	8.04728e-16
TMPOP2	ENSG00000262904	processed_pseudogene	3.17539	3.46509e-19	6.7584e-18
SLC34A3	ENSG00000198569	protein_coding	3.17572	4.77773e-16	6.58934e-15
CDRT1	ENSG00000241322	protein_coding	3.1758	4.75384e-17	7.3491e-16
OPN4	ENSG00000122375	protein_coding	3.17665	2.14286e-09	1.32175e-08
GIP	ENSG00000159224	protein_coding	3.17907	7.07581e-06	2.62608e-05
TDGF1P3	ENSG00000225366	transcribed_processed_pseudogene	3.18189	1.44922e-07	6.94597e-07
AC023824.5	ENSG00000261800	lncRNA	3.1827	0.00331522	0.00762378
PHEX	ENSG00000102174	protein_coding	3.18345	8.90653e-21	2.05755e-19
AC099552.1	ENSG00000217825	lncRNA	3.18409	7.22982e-05	0.000227548
CDCA2	ENSG00000184661	protein_coding	3.18567	1.29657e-49	2.6525e-47
CKMT1B	ENSG00000237289	protein_coding	3.18577	2.77146e-09	1.68105e-08
LINC01297	ENSG00000274827	lncRNA	3.1874	9.29804e-05	0.000287494
CKAP2L	ENSG00000169607	protein_coding	3.19331	4.75987e-60	1.62294e-57
ERCC6L	ENSG00000186871	protein_coding	3.19334	2.91263e-55	7.94478e-53
FAM87A	ENSG00000182366	lncRNA	3.19528	4.43356e-13	4.35364e-12
TUBB4A	ENSG00000104833	protein_coding	3.19564	7.6011e-18	1.27171e-16
UGT2B11	ENSG00000213759	protein_coding	3.1959	1.24248e-25	4.50769e-24
STMND1	ENSG00000230873	protein_coding	3.19651	1.07151e-19	2.19573e-18
SLN	ENSG00000170290	protein_coding	3.19686	1.49608e-06	6.15822e-06
TOMM40P2	ENSG00000215270	processed_pseudogene	3.19692	3.88798e-18	6.73746e-17
AC103808.3	ENSG00000265717	lncRNA	3.19736	9.00772e-08	4.444e-07
LINC01992	ENSG00000260019	lncRNA	3.19751	0.000230285	0.000662501
GRIN2A	ENSG00000183454	protein_coding	3.19763	2.08594e-14	2.3968e-13
GRP	ENSG00000134443	protein_coding	3.19886	3.63964e-07	1.64368e-06
UBE2T	ENSG00000077152	protein_coding	3.19921	5.77203e-92	3.54249e-88
CDC6	ENSG00000094804	protein_coding	3.20111	6.397e-65	2.80432e-62
DEPDC1B	ENSG00000035499	protein_coding	3.20162	7.62628e-44	1.12783e-41
COL7A1	ENSG00000114270	protein_coding	3.20299	6.89142e-27	2.83225e-25
AC147055.1	ENSG00000248635	unprocessed_pseudogene	3.20553	6.04146e-19	1.15031e-17
AC125603.1	ENSG00000257654	lncRNA	3.20623	2.91921e-08	1.53897e-07
MKRN9P	ENSG00000258128	transcribed_processed_pseudogene	3.20631	1.22175e-06	5.08819e-06
AL359510.2	ENSG00000280157	TEC	3.20719	8.03629e-28	3.58642e-26
FAM72C	ENSG00000263513	protein_coding	3.21061	2.54827e-27	1.0988e-25
LINC02293	ENSG00000257185	lncRNA	3.21085	4.55478e-07	2.02298e-06
FBN3	ENSG00000142449	protein_coding	3.21383	8.94001e-20	1.84533e-18
PRC1	ENSG00000198901	protein_coding	3.21431	1.10839e-80	1.27548e-77
AC008991.1	ENSG00000267683	lncRNA	3.21492	5.21393e-06	1.97589e-05
SPINK5	ENSG00000133710	protein_coding	3.21547	9.6848e-29	4.79346e-27
PCSK1N	ENSG00000102109	protein_coding	3.21768	6.25098e-12	5.34322e-11
LINC-ROR	ENSG00000258609	lncRNA	3.2186	1.40641e-09	8.88787e-09
AC006305.1	ENSG00000206129	lncRNA	3.21999	2.20534e-10	1.54744e-09
AC099792.1	ENSG00000231252	lncRNA	3.22129	1.06441e-10	7.76465e-10
LINC01681	ENSG00000233985	lncRNA	3.22203	5.85039e-10	3.88241e-09
CCNO	ENSG00000152669	protein_coding	3.22243	1.31075e-21	3.2679e-20
LINC01192	ENSG00000241369	lncRNA	3.22266	7.4894e-08	3.74155e-07
AC008060.4	ENSG00000260426	lncRNA	3.22606	0.000136556	0.000409891
CA4	ENSG00000167434	protein_coding	3.22689	4.94253e-19	9.50412e-18
HMMR	ENSG00000072571	protein_coding	3.22882	4.28469e-70	2.58655e-67
UNC5D	ENSG00000156687	protein_coding	3.23137	6.73923e-07	2.91376e-06
CSAG2	ENSG00000268902	protein_coding	3.23223	1.61181e-06	6.60721e-06
HOXB8	ENSG00000120068	protein_coding	3.2323	4.69584e-12	4.07829e-11
UHRF1	ENSG00000276043	protein_coding	3.23268	7.78936e-52	1.87474e-49
CREG2	ENSG00000175874	protein_coding	3.2341	1.19094e-23	3.54241e-22
INSL6	ENSG00000120210	protein_coding	3.23562	4.16447e-06	1.60444e-05
SLC22A6	ENSG00000197901	protein_coding	3.23584	1.44854e-06	5.97258e-06
CYP2AB1P	ENSG00000233441	transcribed_unitary_pseudogene	3.23592	2.05379e-07	9.58419e-07
ZNF385D	ENSG00000151789	protein_coding	3.23802	7.6033e-19	1.43655e-17
EME1	ENSG00000154920	protein_coding	3.23853	1.69515e-65	7.90156e-63
HAPLN1	ENSG00000145681	protein_coding	3.24055	3.73196e-11	2.8877e-10
AL445209.1	ENSG00000271776	lncRNA	3.24131	4.94261e-08	2.52612e-07
AC079760.2	ENSG00000243144	lncRNA	3.24336	4.50492e-11	3.44097e-10
POU3F2	ENSG00000184486	protein_coding	3.24398	7.63677e-14	8.18918e-13
AL590666.2	ENSG00000229953	lncRNA	3.24503	2.67721e-31	1.691e-29
AL163952.1	ENSG00000259868	lncRNA	3.24521	2.27221e-11	1.80716e-10
HTR3A	ENSG00000166736	protein_coding	3.24613	8.34108e-11	6.16152e-10
NRCAM	ENSG00000091129	protein_coding	3.2464	5.41156e-19	1.03789e-17
AC144833.1	ENSG00000261426	lncRNA	3.24852	3.80139e-05	0.000125185
OACYLP	ENSG00000224367	transcribed_unitary_pseudogene	3.25034	2.89234e-18	5.09362e-17
ELFN2	ENSG00000243902	lncRNA	3.25285	1.93735e-13	1.99723e-12
MAPK8IP2	ENSG00000008735	protein_coding	3.25548	1.87896e-36	1.72117e-34
DTL	ENSG00000143476	protein_coding	3.25742	1.39987e-66	7.06149e-64
PTF1A	ENSG00000168267	protein_coding	3.25778	5.43751e-05	0.00017463
AC068756.1	ENSG00000242828	lncRNA	3.26045	3.63758e-07	1.64296e-06
[truncated: 876 more rows]
