# Supplementary material for: Signature construction and molecular subtype identification based on immune-related genes for better prediction of prognosis in hepatocellular carcinoma
Source: BMC Med Genomics. 2023 Jun 14;16:130. doi: 10.1186/s12920-023-01558-z (PMC10265900; doi:10.1186/s12920-023-01558-z)
Supplement: Supplementary file 2 — Additional file 2: Table S2. Univariate cox regression for DEIGs. [file 12920_2023_1558_MOESM2_ESM.xlsx]

## Sheet: Sheet1
Table S2 Univariate cox regression for DEIGs.
gene	HR	HR.95L	HR.95H	pvalue
RBP2	1.02057	1.01127	1.02997	1.32e-05
BIRC5	1.02683	1.01456	1.03925	1.58e-05
GLP1R	1.13481	1.06798	1.20582	4.44e-05
FABP6	1.0841	1.03791	1.13233	0.000277754
IL17D	1.08479	1.03652	1.1353	0.00045692
GDF10	1.19509	1.07609	1.32725	0.000867215
EGF	1.50292	1.1811	1.91243	0.000920319
CSPG5	1.46135	1.1631	1.83608	0.00112497
NR0B1	1.06839	1.02611	1.1124	0.00132079
KCNH2	1.03611	1.0132	1.05954	0.0018745
MAPT	1.36012	1.12015	1.6515	0.00189863
ROBO1	1.02595	1.00863	1.04357	0.00318901
GAST	1.00984	1.00325	1.01647	0.00335354
SPP1	1.00019	1.00006	1.00033	0.00370676
GAL	1.18828	1.05608	1.33704	0.0041486
AMHR2	2.42208	1.31582	4.45842	0.00448901
HGF	1.0759	1.01954	1.13538	0.00769757
SEMA5B	1.22694	1.04502	1.44052	0.0124967
GLP2R	2.36757	1.1808	4.7471	0.0151746
ADM2	1.04232	1.00641	1.0795	0.0204882
CCR3	1.20174	1.02674	1.40658	0.0221014
LPA	0.942039	0.89375	0.992937	0.0261514
ESR1	0.730313	0.545875	0.977067	0.0343295
APLN	1.05089	1.00337	1.10066	0.0355174
IL17B	4.32377	1.08378	17.2497	0.0380857
MMP9	1.00538	1.00028	1.01051	0.0388251
IL1RN	0.984899	0.970225	0.999795	0.0469452
SSTR5	1.04508	1.00029	1.09187	0.0484879
