# Supplementary material for: Signature construction and molecular subtype identification based on immune-related genes for better prediction of prognosis in hepatocellular carcinoma
Source: BMC Med Genomics. 2023 Jun 14;16:130. doi: 10.1186/s12920-023-01558-z (PMC10265900; doi:10.1186/s12920-023-01558-z)
Supplement: Supplementary file 3 — Additional file 3: Table S3. The multivariate Cox regression analysis. [file 12920_2023_1558_MOESM3_ESM.xlsx]

## Sheet: Sheet1
Table S3 The multivariate Cox regression analysis
Gene	Coef	HR	HR.95L	HR.95H	pvalue
GAL	0.359457	1.43255	1.00446	2.04309	0.0471967
NR0B1	0.454027	1.57464	1.02134	2.42768	0.0398233
MAPT	0.494642	1.63991	0.997007	2.69738	0.051396
CCR3	0.641349	1.89904	0.980966	3.67633	0.0570478
GLP1R	0.306473	1.35863	0.942572	1.95833	0.100401
BIRC5	0.428151	1.53442	1.21367	1.93993	0.000345563
IL17B	2.10009	8.16689	1.47545	45.2053	0.0161508
